# Supplementary material for: The Association Between Familial Risk and Brain Abnormalities Is Disease Specific: An ENIGMA-Relatives Study of Schizophrenia and Bipolar Disorder
Source: PubMed Central journal article supplement — Biol Psychiatry. Author manuscript; Available in PMC 2020 Mar 13. (PMC7068800; doi:10.1016/j.biopsych.2019.03.985), 2019-06-13
Supplement: NIHMS1555631-supplement-Supplement_1.pdf [file NIHMS1555631-supplement-Supplement_1.pdf]

# The Association Between Familial Risk and Brain Abnormalities Is Disease-specific: An ENIGMA-Relatives Study of Schizophrenia and Bipolar Disorder

---

## Supplement Table of Contents

|                                                                                                                                                                                                                                              |    |
|----------------------------------------------------------------------------------------------------------------------------------------------------------------------------------------------------------------------------------------------|----|
| Supplementary Table S1. Sample inclusion criteria.....                                                                                                                                                                                       | 3  |
| Supplementary Table S2. Sample image acquisition and image processing details.....                                                                                                                                                           | 10 |
| Supplementary Table S3. Global and subcortical differences between bipolar and schizophrenia first-degree relatives, patients and controls.....                                                                                              | 13 |
| Supplementary Table S4. Global and subcortical differences between bipolar and schizophrenia first-degree relatives, patients and controls, controlling for intracranial volume (ICV).....                                                   | 14 |
| Supplementary Table S5. Global and subcortical differences between bipolar and schizophrenia first-degree relatives, patients and controls, controlling for psychopathology in relatives and/or controls.....                                | 15 |
| Supplementary Table S6. Global and subcortical differences between bipolar and schizophrenia first-degree relatives, patients and controls, controlling for psychopathology in relatives and/or controls and intracranial volume (ICV).....  | 16 |
| Supplementary Table S7a. Global and subcortical differences between MZ co-twins, DZ co-twins, offspring, siblings, parents of patients with bipolar disorder and controls.....                                                               | 17 |
| Supplementary Table S7b. Global and subcortical differences between MZ co-twins, DZ co-twins, offspring, siblings, parents of patients with schizophrenia and controls.....                                                                  | 18 |
| Supplementary Table S8a. Global and subcortical differences between MZ co-twins, DZ co-twins, offspring, siblings, parents of patients with bipolar disorder and controls, controlling for intracranial volume (ICV).....                    | 19 |
| Supplementary Table S8b. Global and subcortical differences between MZ co-twins, DZ co-twins, offspring, siblings, parents of patients with schizophrenia and controls, controlling for intracranial volume (ICV).....                       | 20 |
| Supplementary Table S9a. Global and subcortical differences between MZ co-twins, DZ co-twins, offspring, siblings, parents of patients with bipolar disorder and controls, controlling for psychopathology in relatives and/or controls..... | 21 |
| Supplementary Table S9b. Global and subcortical differences between MZ co-twins, DZ co-twins, offspring, siblings, parents of patients with schizophrenia and controls, controlling for psychopathology in relatives and/or controls.....    | 22 |

|                                                                                                                                                                                                                                                                             |    |
|-----------------------------------------------------------------------------------------------------------------------------------------------------------------------------------------------------------------------------------------------------------------------------|----|
| Supplementary Table S10a. Global and subcortical differences between MZ co-twins, DZ co-twins, offspring, siblings, parents of patients with bipolar disorder and controls, controlling for psychopathology in relatives and/or controls and intracranial volume (ICV)..... | 23 |
| Supplementary Table S10b. Global and subcortical differences between MZ co-twins, DZ co-twins, offspring, siblings, parents of patients with schizophrenia and controls, controlling for psychopathology in relatives and/or controls and intracranial volume (ICV).....    | 24 |
| Supplementary Table S11a. Global and subcortical differences between <i>healthy</i> MZ co-twins, DZ co-twins, offspring, siblings, parents of patients with bipolar disorder and <i>healthy</i> controls.....                                                               | 25 |
| Supplementary Table S11b. Global and subcortical differences between <i>healthy</i> MZ co-twins, DZ co-twins, offspring, siblings, parents of patients with schizophrenia and <i>healthy</i> controls.....                                                                  | 26 |
| Supplementary Table S12a. Global and subcortical differences between <i>healthy</i> MZ co-twins, DZ co-twins, offspring, siblings, parents of patients with bipolar disorder and <i>healthy</i> controls, controlling for intracranial volume (ICV).....                    | 27 |
| Supplementary Table S12b. Global and subcortical differences between <i>healthy</i> MZ co-twins, DZ co-twins, offspring, siblings, parents of patients with schizophrenia and <i>healthy</i> controls, controlling for intracranial volume (ICV).....                       | 28 |
| Supplementary Table S13. Meta-regression results for relationship between FDRs-BD and FDRs-SZ compared with controls, and mean age.....                                                                                                                                     | 29 |
| Supplementary Figure S1i-xvii. Forest plots per region of interest.....                                                                                                                                                                                                     | 30 |
| Supplementary Figure S2i-xvii. Meta-regression plots per region of interest.....                                                                                                                                                                                            | 47 |
| Supplementary Methods. Statistically comparing effect sizes.....                                                                                                                                                                                                            | 64 |
| Supplementary Results. FDRs subtype analyses.....                                                                                                                                                                                                                           | 65 |
| Supplementary References.....                                                                                                                                                                                                                                               | 66 |

**Table S1.** Sample inclusion criteria

| Sample     | Inclusion criteria                                                                                                                                                                                                                                                                                                                                                                                                                                                                                                                                                                                                                                                                                                                                                                                                                                                                                                                                                                                                                                            |
|------------|---------------------------------------------------------------------------------------------------------------------------------------------------------------------------------------------------------------------------------------------------------------------------------------------------------------------------------------------------------------------------------------------------------------------------------------------------------------------------------------------------------------------------------------------------------------------------------------------------------------------------------------------------------------------------------------------------------------------------------------------------------------------------------------------------------------------------------------------------------------------------------------------------------------------------------------------------------------------------------------------------------------------------------------------------------------|
| BPO_FLB    | BD patients were diagnosed with either type I or type II BD (BD I and BD II), or BD not otherwise specified (BD NOS) according to DSM-IV. Patients exclusion criteria included substance use within the past six months and general medical problems. Inclusion criteria for offspring of BD patients included diagnosis of BD in biological father and or mother according to SCID. Inclusion criteria for healthy controls included those without a history of any psychiatric/neurological disorders or mood disorders in first-degree relatives. Exclusion criteria for patient, healthy control and offspring groups included head injury with loss of consciousness, presence of metallic objects in the body, family history of hereditary neurological disorders, and pregnancy.                                                                                                                                                                                                                                                                      |
| C_SFS      | Schizophrenia and schizoaffective patients participated. Inclusion criteria for all participants included: 1) age 18-65; 2) minimum intelligence quotient (IQ) of 70 as measured by Wechsler Abbreviated Scale of Intelligence; 3) no current diagnosis of drug or alcohol dependence or abuse; 4) no history of head injury or being unconscious for more than 20 minutes; 5) no history of electroconvulsive therapy; and 6) no history of a neurological condition. Further criteria for inclusion of relatives and controls were no lifetime diagnosis of a psychotic or bipolar disorder, Axis II Cluster A disorder, or history of anti-psychotic medication use. Further criterion for inclusion of community controls was no family history of a psychotic or bipolar disorder.                                                                                                                                                                                                                                                                       |
| Cardiff    | All participants were age 35 years or older and included: 1) individuals with confirmed diagnosis of bipolar disorder type I or type II, euthymic at time of recruitment and reporting mood stability and no-change in medication for one month prior scanning; 2) unaffected relatives of bipolar participants with no personal history of mood disorders or psychosis; 3) healthy controls with no personal or first-degree family history of mental disorders. All DSM-IV diagnoses were confirmed through the Mini-international neuropsychiatric interview (1). Patients were recruited through the Bipolar Disorder Research Network (BDRN) and the National Centre for Mental Health (NCMH) both at Cardiff University, non-affected siblings were recruited via BD participants, and healthy controls from the community via advertisement.                                                                                                                                                                                                           |
| CLiNG – BD | Inclusion criteria for participants were a) age between 18 and 60 years, b) parents, siblings or offspring of index patients with bipolar disorder, c) no own diagnosis of a mental disorder and d) right-handedness. Diagnosis of bipolar disorder in index patients was made by an experienced clinician using the German version of the Structured Clinical Interview for DSM-IV, unless a medical report confirming diagnosis of bipolar disorder was provided. Exclusion criteria included history of neurological and severe medical disorders, current or past psychopathology as well as substance dependence and substance abuse.                                                                                                                                                                                                                                                                                                                                                                                                                    |
| CLiNG – SZ | Inclusion criteria for participants were a) age between 18 and 60 years, b) parents, siblings or offspring of index patients with schizophrenia, c) no own diagnosis of a mental disorder and d) right-handedness. Diagnosis of schizophrenia in index patients was made by an experienced clinician using the German version of the Structured Clinical Interview for DSM-IV, unless a medical report confirming diagnosis of schizophrenia was provided. Exclusion criteria included history of neurological and severe medical disorders, current or past psychopathology as well as substance dependence and substance abuse.                                                                                                                                                                                                                                                                                                                                                                                                                             |
| DEU        | The inclusion criteria for patient group were having a diagnosis of bipolar disorder type I according to DSM-IV, aging between 18 and 65 years, being in euthymic state (according to DSM-IV and scoring $\leq 7$ on both Young Mania Rating Scale and Hamilton Rating Scale for Depression) for at least six months and having no axis I comorbidity. The inclusion criteria for first degree relatives of bipolar disorder patients were having no lifetime axis I diagnosis, and for healthy controls, having no lifetime axis I diagnosis and family history for psychiatric disorders at the time of recruitment. The following exclusion criteria were applied to all groups: presence of auditory or visual impairment, history of neurosurgical intervention, being pregnant or breastfeeding, diagnosis of neurocognitive illness or substance use during the preceding six weeks before participating in the study. All participants were evaluated using the Structured Clinical Interview for Diagnostic Statistical Manual-IV (DSM-IV) (SCID-I). |
| EGEU       | All participants were aged between 20 and 55 years old and included: 1) patients with bipolar disorder type 1, euthymic at the time of recruitment (defined as scoring less than five on the Young Mania Rating Scale (YMRS), and less than 11 on the Hamilton Depression Rating Scale-17 item (HAM-D-17) for at least three months prior to and during the MRI scanning); 2) healthy siblings of bipolar participants, never diagnosed with mental illness; 3) unrelated healthy controls, no personal or family history of mental illness. All patients were recruited from the Ege University School of Medicine's Department of Psychiatry, where the patients had been receiving follow-up care with monthly assessments for at least three years, healthy siblings were recruited via BD patients, and unrelated healthy controls from community via local advertisement.                                                                                                                                                                               |

| Sample  | Inclusion criteria                                                                                                                                                                                                                                                                                                                                                                                                                                                                                                                                                                                                                                                                                                                                                                                                                                                                                                                                                                                                                                                                                                                                                                                                                                                                                                                                                                                                                                                                                                                                                                                                |
|---------|-------------------------------------------------------------------------------------------------------------------------------------------------------------------------------------------------------------------------------------------------------------------------------------------------------------------------------------------------------------------------------------------------------------------------------------------------------------------------------------------------------------------------------------------------------------------------------------------------------------------------------------------------------------------------------------------------------------------------------------------------------------------------------------------------------------------------------------------------------------------------------------------------------------------------------------------------------------------------------------------------------------------------------------------------------------------------------------------------------------------------------------------------------------------------------------------------------------------------------------------------------------------------------------------------------------------------------------------------------------------------------------------------------------------------------------------------------------------------------------------------------------------------------------------------------------------------------------------------------------------|
| EHRS    | All participants were aged between 16 and 25 years old and recruited across Scotland. High-risk individuals were included if they had no history of serious psychiatric problems and had at least two first- or second-degree relatives affected with schizophrenia. Participants for the control group were recruited from the social network of the high-risk individuals themselves; they had no personal or family history of other psychotic illness, but could have a family history of other psychiatric illness and otherwise were similar to the high-risk participants as possible. First-episode individuals were recruited from local hospitals, were balanced group-wise for age with the high-risk individuals and had no family history of schizophrenia.                                                                                                                                                                                                                                                                                                                                                                                                                                                                                                                                                                                                                                                                                                                                                                                                                                          |
| ENBD_UT | Specific inclusion criteria for the BD sibling pairs are: a) BD proband with diagnosis of BD I or II, based on DSM-IV criteria, b) having a same-gender sibling not affected by BD; c) ages 18-65 years old; d) BD proband and unaffected sibling no more than 10 years apart in age; e) BD proband at any current mood state at the time of the study; f) BD proband preferably off pharmacological treatment at the time of study, but if not feasible, being on antidepressants and mood stabilizers (including anticonvulsants, typical and atypical antipsychotics, and lithium will be allowed; g) BD proband and unaffected sibling brought up together in the same family. Exclusion criteria for the BD sibling pairs: a) diagnosis of Bipolar Disorder, Schizoaffective Disorder or Schizophrenia is not allowed. Alcohol and substance abuse/dependence (if in remission in the past 6 months) and anxiety disorders are allowed; b) being on a regular dose of benzodiazepines within two weeks of study participation; c) pregnancy d) ineligibility or inability of one of the members of the sibling pair to participate in the study. Exclusion criteria for controls: a) a lifetime psychiatric diagnosis, b) family history of psychiatric illness in a first-degree relative.                                                                                                                                                                                                                                                                                                                  |
| HHR     | Participants were recruited from an ongoing Offspring Risk for BD Imaging Study–ORBIS. We recruited offspring from families of well-characterized adult BD probands who had participated in previous genetic and HR studies (2–4) in Halifax, Nova Scotia. The inclusion criterion was 15–30 years of age. We included participants with BD type I or type II, but not with BD NOS as probands for this study. The offspring from BD probands were divided into two subgroups. 1) The unaffected HR group, which included offspring without a personal history of Axis I psychiatric disorders. These individuals were considered HR because they came from multiplex families (more than one member affected with BD) and had one parent affected with a primary mood disorder. 2) The affected familial group, which included offspring meeting criteria for a lifetime Axis I diagnosis of mood disorders (i.e. a personal history of at least one episode of depression, hypomania, or mania meeting full DSM-IV criteria) and had one parent affected with a primary mood disorder. Depressive episodes were included because unipolar depression is characteristically the first manifestation of illness in patients who later develop BD. Lastly, we recruited control participants free of personal or family history of DSM-IV Axis I psychiatric disorders. Common exclusion criteria for all groups were a personal history of 1) any serious medical or neurologic disorders, 2) substance abuse/dependence during the previous 6 months, or 3) magnetic resonance imaging (MRI) exclusion criteria. |
| HUBIN   | Patients diagnosed with long term psychotic disorder were recruited from outpatient clinics in the North-Western part of Stockholm County. The patients were diagnosed according to DSM-III-R and DSM-IV based on information from interviews and medical records. Non-psychotic siblings of patients with psychosis were asked to participate when their relative with a psychotic disorder had agreed to their participation. Control subjects were recruited among students, hospital staff members or from a population register. All controls with the exception of those recruited from a population register had earlier attended in biological research at the Karolinska Institute (5–7). The controls consisted of non-psychotic individuals unrelated to the patients. Neither the siblings, nor the controls received any psychotic diagnosis according to DSM-III-R and DSM-IV.                                                                                                                                                                                                                                                                                                                                                                                                                                                                                                                                                                                                                                                                                                                      |
| IDIBAPS | The study was conducted in the Child and Adolescent Psychiatry Department of the Hospital Clinic of Barcelona, Spain. The protocol was approved by the local ethics review board and further details of the sample can be found in (8). Patients with a diagnosis of schizophrenia or bipolar disorder from adult psychiatry units with offspring 6 to 17 years old were identified and invited to participate in the study. The exclusion criteria for proband parents were intellectual disability and drug or medically induced psychosis or mania. Exclusion criteria for offspring included intellectual disability, head injury with loss of consciousness, or severe neurological conditions. Community control parents were recruited through advertisements posted in primary health care centers and other community locations within the same geographic area as the patients. The exclusion criteria were intellectual disability, severe neurological conditions and personal or first-degree family history of schizophrenia or bipolar spectrum disorders. All 6- to 17-year-old offspring of community control parents were invited to participate in the study; exclusion criteria were the same as those for high-risk offspring. To decrease selection bias, parents who stated they were specifically motivated to participate because of concerns about school performance or emotional or behavioral problems in their offspring were excluded.                                                                                                                                             |

| Sample             | Inclusion criteria                                                                                                                                                                                                                                                                                                                                                                                                                                                                                                                                                                                                                                                                                                                                                                                                                                                                                                                                                                                                                                                                                                                                                                                                                                                                                                                                                                                                                                                                                                                                                                                                                                                                                                                                       |
|--------------------|----------------------------------------------------------------------------------------------------------------------------------------------------------------------------------------------------------------------------------------------------------------------------------------------------------------------------------------------------------------------------------------------------------------------------------------------------------------------------------------------------------------------------------------------------------------------------------------------------------------------------------------------------------------------------------------------------------------------------------------------------------------------------------------------------------------------------------------------------------------------------------------------------------------------------------------------------------------------------------------------------------------------------------------------------------------------------------------------------------------------------------------------------------------------------------------------------------------------------------------------------------------------------------------------------------------------------------------------------------------------------------------------------------------------------------------------------------------------------------------------------------------------------------------------------------------------------------------------------------------------------------------------------------------------------------------------------------------------------------------------------------|
| IoP – BD           | Twins were recruited using a variety of methods, these were: 1. Direct contact with health professionals, including psychiatrists, clinical psychologists, occupational therapists and so on; 2. Advertising: Adverts were placed national and local newspapers as well as in specific user group publications such as Pendulum, the Manic Depression Fellowship's quarterly newsletter. Flyers for the study were also distributed in hospitals, clinics and chemists. Links were also placed on various internet sites such as Wikipedia.org and self-help groups; and 3. Talks were given by team members at service user and professional conferences. Control subjects were recruited primarily via advertising in the national media, with further recruitment from a pool of research participants obtained for previous studies conducted at the Institute of Psychiatry (IoP, now IoPPN), with a smaller group being referred by members of staff at the Bethlem and Maudsley Hospital Trust and word of mouth. Exclusion criteria for all participants were a history of neurologic illness or of systemic illness with known neurologic complication, history of head injury with loss of consciousness, and current substance misuse or dependence. Controls had no personal or family history of psychotic illness. Controls and unaffected relatives with a nonpsychotic psychiatric diagnosis were included. All participants were between 16 and 65 years-old at the time of participation. All the studies were approved by institutional review boards, and all the participants gave written informed consent before participating. Further information can be found in Georgiades <i>et al.</i> (9) and Sugihara <i>et al.</i> (10). |
| IoP – SZ           | Twins were referred from across the United Kingdom by their treating psychiatrists. Control twins were recruited from the Institute of Psychiatry Volunteer Twin Register and by national media advertisements. Families were referred from clinics and voluntary organizations across the United Kingdom. Control subjects were ascertained from a pool of research participants obtained for previous studies conducted at the Institute of Psychiatry, from members of staff at the Bethlem and Maudsley Hospital Trust, and through advertisements in the press. Exclusion criteria for all participants were a history of neurologic illness or of systemic illness with known neurologic complication, history of head injury with loss of consciousness, and current substance misuse or dependence. Controls had no personal or family history of psychotic illness. Controls and unaffected relatives with a nonpsychotic psychiatric diagnosis were included. All the studies were approved by institutional review boards, and all the participants gave written informed consent before participating. Further information can be found in the following papers (11–13).                                                                                                                                                                                                                                                                                                                                                                                                                                                                                                                                                                     |
| LIBD               | Participants were recruited nationwide as part of a study at the National Institute of Mental Health, Bethesda, MD. Samples used in this study were under a standard procedure including a structured diagnostic interview (Structured Clinical Interview for <i>DSM-IV</i> ) and a formal neurological examination. All patients met <i>DSM-IV</i> criteria for schizophrenia or related diagnoses including schizoaffective disorder, psychosis (not otherwise specified), and schizoid, paranoid, and schizotypal personality disorders. The majority of patients were taking antipsychotic medication at the time of scan, and a minority had a lifetime history of comorbid mental illness or substance abuse/dependence (including alcohol). Exclusion criteria for normal controls included a current or past history of neurological or psychiatric disorders, hypertension or drug abuse. A minority of siblings had a past lifetime history of a non-psychotic mental illness and/or substance abuse and/or dependence (39.7%), but none met criteria at the time of evaluation. No subjects in any group had a current history of alcohol or substance abuse within 6 months of being scanned. All subjects provided written informed consent, and participated according to the guidelines of the National Institute of Mental Health Institutional Review Board.                                                                                                                                                                                                                                                                                                                                                                            |
| Maastricht – GROUP | Participants were recruited in selected representative geographical areas in the Netherlands and Belgium, patients were identified through representative clinicians providing health care for patients with psychotic disorder. Siblings were contacted through participating patients. Mailings and advertisements were effectuated in local newspapers of the same geographical area in order to recruit control participants. Inclusion criteria were; age range 16-50 years, fluent in Dutch language and for patients: a diagnosis of non-affective psychotic disorder with illness duration of <10 years. Siblings and controls were excluded if they had a lifetime diagnosis of any non-affective psychotic disorder. In addition, controls were excluded if they had a first-degree relative with a lifetime diagnosis of any psychotic disorder. This was assessed using the Family Interview for Genetic Studies (FIGS) (14). Diagnosis was based on the Diagnostic and Statistical Manual of Mental Disorder-IV ( <i>DSM-IV</i> ) criteria, measured with the Comprehensive Assessment of Symptoms and History (CASH) interview (15). All participants were screened before MRI scanning and excluded based on the following: brain injury with unconsciousness of > than 1 hour, meningitis or other neurological diseases with possible impact on brain structure or function, cardiac arrhythmia requiring medical treatment and severe claustrophobia. Participants with metal corpora aliena were excluded from the study, as were women with intrauterine device status and (suspected) pregnancy.                                                                                                                                    |

| Sample     | Inclusion criteria                                                                                                                                                                                                                                                                                                                                                                                                                                                                                                                                                                                                                                                                                                                                                                                                                                                                                                                                                                                                                                                                                                                                                                                                                                                                    |
|------------|---------------------------------------------------------------------------------------------------------------------------------------------------------------------------------------------------------------------------------------------------------------------------------------------------------------------------------------------------------------------------------------------------------------------------------------------------------------------------------------------------------------------------------------------------------------------------------------------------------------------------------------------------------------------------------------------------------------------------------------------------------------------------------------------------------------------------------------------------------------------------------------------------------------------------------------------------------------------------------------------------------------------------------------------------------------------------------------------------------------------------------------------------------------------------------------------------------------------------------------------------------------------------------------|
| MFS        | All individuals were aged 16-70. Participant groups included (i) patients with DSM-IV confirmed diagnoses of schizophrenia or bipolar 1 disorder; (ii) unaffected first-degree relatives of these patients including parents, siblings and offspring; (iii) healthy volunteers with no personal or family history of psychotic illness (16,17). Families were recruited through voluntary organizations or by direct psychiatric referral and on the basis of either being multiply affected, where the index patient had one or more first- or second- degree relatives with a psychotic disorder, or singly-affected where there was no known family history of psychotic disorder. All of the bipolar disorder patients and relatives were from multiply affected families. Exclusion criteria for all participants included organic brain disease, head trauma resulting in loss of consciousness for more than 5 minutes, or DSM-IV substance or alcohol dependence in the 12 months before the assessment.                                                                                                                                                                                                                                                                      |
| MooDS – BD | Participants were aged between 18 and 53 years. First-degree relatives were offspring or siblings of index patients with BPD. Diagnosis of BPD in index patients was made by an experienced clinician using the German version of the Structured Clinical Interview for DSM-IV, or the patients provided a medical report confirming diagnosis of BPD. All participants had no history of any neurologic disorder or current psychiatric Axis I disorder including drug or alcohol dependence as verified by the nonpatient version of the Structured Clinical Interview for DSM-IV and had no MRI contraindications.                                                                                                                                                                                                                                                                                                                                                                                                                                                                                                                                                                                                                                                                 |
| MooDS – SZ | Participants were aged between 18 and 55 years. First-degree relatives were parents, offspring or siblings of index patients with SCZ. Diagnosis of SCZ in index patients was made by an experienced clinician using the German version of the Structured Clinical Interview for DSM-IV, or the patients provided a medical report confirming diagnosis of SCZ. All participants had no history of any neurologic disorder or current psychiatric Axis I disorder including drug or alcohol dependence as verified by the nonpatient version of the Structured Clinical Interview for DSM-IV and had no MRI contraindications.                                                                                                                                                                                                                                                                                                                                                                                                                                                                                                                                                                                                                                                        |
| MSSM       | All participants were aged 18 to 67 years. The eligibility criteria for all participants were (a) IQ>70; (b) no history of head trauma or loss of consciousness; (c) no current or lifetime history of medical or neurological disorders; (d) no lifetime history of substance use disorder; (e) no MRI contraindications (e.g. metal implants, claustrophobia). Patients were required to fulfil diagnostic DSM-IV criteria for BD type-I or type II, while healthy volunteers were included if they had no lifetime personal history of mental disorders and no family history (up to second-degree relatives) of BD. Unaffected relatives of bipolar participants were included if they had no personal history of bipolar disorder or psychosis.                                                                                                                                                                                                                                                                                                                                                                                                                                                                                                                                  |
| NU         | Participants were recruited through the Conte Center for the Neuroscience of Mental Disorders (CCNMD) at Washington University in St. Louis. SCZ participants were recruited from local inpatient and outpatient treatment facilities and had to meet the criteria for DSM-IV schizophrenia. CON participants were recruited using local advertisements from the same community. Exclusion criteria for CON participants included a lifetime history of any Axis I psychiatric disorder and having a first-degree relative with a psychotic disorder. Both SCZ-SIB and CON-SIB were excluded for a lifetime history of Axis I psychotic disorders (including bipolar disorder) and current major depression, but not other Axis I disorders. Participants from any of the 4 groups were excluded if they 1) met DSM-IV criteria for substance abuse or dependence within the past 6 months; 2) had a clinically unstable or severe medical disorder, or a medical disorder that would confound the assessment of psychiatric diagnosis or render research participation dangerous; 3) had head injury (past or present) with documented neurological sequelae or resulting in loss of consciousness; and 4) met DSM-IV criteria for mental retardation (mild or greater in severity). |
| Olin       | Patients with bipolar I disorder, their unaffected siblings, and unrelated healthy volunteers were recruited from psychiatric facilities and community advertisements in Hartford, CT. Patients were included if they met DSM-IV criteria for bipolar I disorder based on the Structured Clinical Interview for DSM-IV disorders; had no history of major medical or neurological conditions (e.g. epilepsy, migraine, head trauma with loss of consciousness); had an IQ > 80 (based on WASI); and had a sibling willing to participate in the study. Eligibility criteria for siblings and unrelated healthy volunteers were identical to those for patients, with the exception of a personal lifetime diagnosis of bipolar or psychosis spectrum disorders (having a DSM-IV diagnosis other than bipolar or psychosis spectrum disorders was not an exclusion criterium). In addition, unrelated healthy volunteers could not have a family history of mood or psychotic disorders. All participants provided informed consent as approved by the institutional review board at Hartford Hospital and Yale University.                                                                                                                                                            |

| Sample                        | Inclusion criteria                                                                                                                                                                                                                                                                                                                                                                                                                                                                                                                                                                                                                                                                                                                                                                                                                                                                                                                                                                                                                                                                                                                                                                                                                                                                                                                                                                                                                                     |
|-------------------------------|--------------------------------------------------------------------------------------------------------------------------------------------------------------------------------------------------------------------------------------------------------------------------------------------------------------------------------------------------------------------------------------------------------------------------------------------------------------------------------------------------------------------------------------------------------------------------------------------------------------------------------------------------------------------------------------------------------------------------------------------------------------------------------------------------------------------------------------------------------------------------------------------------------------------------------------------------------------------------------------------------------------------------------------------------------------------------------------------------------------------------------------------------------------------------------------------------------------------------------------------------------------------------------------------------------------------------------------------------------------------------------------------------------------------------------------------------------|
| PHHR                          | Families were identified through adult probands with BD, who had participated in the Czech Bipolar Disorder Case Registry. Only the offspring from these families, not the probands, were a part of the MRI study. The inclusion criterion was 15–30 years of age. We included participants with BD type I or type II, but not with BD NOS as probands for this study. The offspring from BD parents were divided into two subgroups: 1) the Unaffected HR group, which consisted of offspring with no lifetime history of psychiatric disorders. These individuals were at an increased risk for BD because they had one parent affected with a primary mood disorder. 2) The Affected Familial group, which consisted of offspring who met criteria for a lifetime Axis I diagnosis of mood disorders (i.e., a personal history of at least one episode of depression, hypomania, or mania meeting full DSM-IV criteria). Also, we recruited control participants free of personal or family history of DSM-IV Axis I psychiatric disorders. Common exclusion criteria for all groups were a personal history of 1) any serious medical or neurologic disorders, 2) substance abuse/dependence during the previous 6 months, or 3) magnetic resonance imaging (MRI) exclusion criteria.                                                                                                                                                              |
| STAR (Swedish) BD twin cohort | Subjects were identified on a nation-wide basis through the Sweden Twin Registry. Twin pairs were eligible for inclusion if they were same sex, between the ages of 25 and 65, and born in Sweden between 1940 and 1985 (inclusive). To ascertain twin pairs comprising at least one twin with a diagnosis of schizophrenia or bipolar disorder, this set of twins was screened using hospital admission and discharge diagnosis information from the Swedish National Patient Registry. Monozygotic and dizygotic pairs were recruited from all counties in Sweden and invited to Karolinska Institute for structured diagnostic interviews and additional evaluations, including neuroimaging. Final diagnoses were determined by a consensus procedure. Zygosity was determined for nearly all twin pairs using DNA testing or a well-validated screening measure for those without DNA available on both co-twins. Exclusion criteria were presence of a neurological disorder, history of significant head injury with loss of consciousness, mental retardation, history of substance dependence within 6 months of the screening interview, or inability to read or comprehend spoken and written Swedish. Healthy control pairs were recruited to match proband pairs on age, sex, and zygosity. Healthy controls were excluded if they had a family history of schizophrenia or bipolar disorder according to medical records or self-report. |
| STAR (Swedish) SZ twin cohort | Subjects were identified on a nation-wide basis through the Sweden Twin Registry. Twin pairs were eligible for inclusion if they were same sex, between the ages of 25 and 65, and born in Sweden between 1940 and 1985 (inclusive). To ascertain twin pairs comprising at least one twin with a diagnosis of schizophrenia or bipolar disorder, this set of twins was screened using hospital admission and discharge diagnosis information from the Swedish National Patient Registry. Monozygotic and dizygotic pairs were recruited from all counties in Sweden and invited to Karolinska Institute for structured diagnostic interviews and additional evaluations, including neuroimaging. Final diagnoses were determined by a consensus procedure. Zygosity was determined for nearly all twin pairs using DNA testing or a well-validated screening measure for those without DNA available on both co-twins. Exclusion criteria were presence of a neurological disorder, history of significant head injury with loss of consciousness, mental retardation, history of substance dependence within 6 months of the screening interview, or inability to read or comprehend spoken and written Swedish. Healthy control pairs were recruited to match proband pairs on age, sex, and zygosity. Healthy controls were excluded if they had a family history of schizophrenia or bipolar disorder according to medical records or self-report. |
| SydneyBipolarGroup            | All participants were aged between 12 and 30 years and included: 1) individuals with a confirmed diagnosis of bipolar disorder I, II, or schizoaffective disorder; 2) the offspring or siblings of a proband with a confirmed DSM-IV diagnosis of bipolar disorder I, II, or schizoaffective disorder; 3) control subjects with no family history of bipolar disorder I or II, schizoaffective disorder, schizophrenia, recurrent major depression, recurrent substance abuse, or psychiatric hospitalization, and no personal history of bipolar disorder I, II, or schizoaffective disorder. Current or lifetime diagnoses of psychiatric disorders other than bipolar disorder were not considered an exclusion factor for controls or bipolar relatives. All DSM-IV diagnoses were confirmed by two independent raters using Best Estimate Methodology (18) and the K-SADS-BP (19) or DIGS Version 4 (20), the FIGS (14), and available medical records. Participants were recruited from bipolar research clinics, mental health organizations, families participating in alternate bipolar research projects, electronic and printed media, and public notice boards.                                                                                                                                                                                                                                                                            |
| UMCG – GROUP                  | Fifty siblings of patients with schizophrenia and fifty matched healthy controls without any first- or second-degree family members with a psychotic disorder were included in this study. All 80 siblings and 56 controls were included from a multi-center (Groningen and Amsterdam) add-on study from the GROUP project [Genetic Risk & Outcome of Psychosis (21)]. This sample partially overlaps with a previous study from our group [nsiblings=20, ncontrols=8] (22). The other 24 controls were recruited outside of the GROUP study through advertisements. None of the participants reported a presence or history of any psychiatric or neurological disorder.                                                                                                                                                                                                                                                                                                                                                                                                                                                                                                                                                                                                                                                                                                                                                                              |

| Sample          | Inclusion criteria                                                                                                                                                                                                                                                                                                                                                                                                                                                                                                                                                                                                                                                                                                                                                                                                                                                                                                                                                                                                                                                                                                                                                                                                                                                                                                                                                                                                                                                                                                                                                                                                                                                                                                                                                                                                    |
|-----------------|-----------------------------------------------------------------------------------------------------------------------------------------------------------------------------------------------------------------------------------------------------------------------------------------------------------------------------------------------------------------------------------------------------------------------------------------------------------------------------------------------------------------------------------------------------------------------------------------------------------------------------------------------------------------------------------------------------------------------------------------------------------------------------------------------------------------------------------------------------------------------------------------------------------------------------------------------------------------------------------------------------------------------------------------------------------------------------------------------------------------------------------------------------------------------------------------------------------------------------------------------------------------------------------------------------------------------------------------------------------------------------------------------------------------------------------------------------------------------------------------------------------------------------------------------------------------------------------------------------------------------------------------------------------------------------------------------------------------------------------------------------------------------------------------------------------------------|
| UMCU – BD twins | <p>All twins were raised together, except for one control pair where twins were separated at 12 years of age when both parents died. Subjects were between 18 and 60 years of age at the time of enrolment in the study. Clinical diagnosis of Axis I psychiatric disorders and Axis II personality disorders was confirmed using the SCID and SIDP, respectively, and through available medical records. Patients were also interviewed on their medication history. The twin pairs had no history of drug or alcohol dependency for the last 6 months prior to inclusion in the study, for this was an exclusion criterion. Moreover, none had severe medical illness, verified with a medical history inventory. The current mood state of BD patients was assessed using the YMRS and the IDS. Upon inclusion, all patients were euthymic with a YMRS score of 4 or less and an IDS score of 12 or less, except for nine BD patients who were mildly to severely depressed or hypomanic. Healthy control pairs were matched to the bipolar pairs for zygosity, gender, age and parental education. Control pairs had no history of severe medical illness and had no first-degree relative with a history of a major Axis I psychiatric disorder (DSM-IV). Family histories of all twins were obtained via the Family Interview Genetic Studies, performed with both twins of each pair. Zygosity was determined with DNA fingerprinting using high polymorphic microsatellite markers 9 to 11. The medical ethics review board of the University Medical Center Utrecht approved the study and all participants gave written informed consent after full explanation of the study aims and procedures. Further information can be found in Van der Schot <i>et al.</i> (23) and Bootsman <i>et al.</i> (24).</p> |
| UMCU – DBSOS    | <p>This study includes participants between 8 and 18 years of age, including offspring of a patient with schizophrenia, offspring of a patient with bipolar disorder, and community control subjects. None met DSM-V criteria for schizophrenia or a related psychotic disorder at the time of baseline assessment (present and lifetime). For each family, all offspring in the appropriate age range entered our study to prevent a biased selection of participants within the family, as offspring with (subthreshold) symptoms may otherwise be more likely to be signed up for study participation than offspring with no (subthreshold) symptoms. Clinical diagnoses of parents were confirmed using the SCID-I. Control parents were screened for psychopathology using the mini-SCAN. The medical ethics committee of the University Medical Center Utrecht approved the study, and all participating children and their parents provided written informed consent. The K-SADS-PL was used to evaluate symptoms and DSM-V diagnoses of all participants. The majority of the offspring were naive to psychotropic medication. Further information can be found in Collin <i>et al.</i> (25).</p>                                                                                                                                                                                                                                                                                                                                                                                                                                                                                                                                                                                                             |
| UMCU – GROUP    | <p>Patients had to fulfil the following criteria: 1) age between 16 and 50 years, 2) meeting DSM-IV criteria for a nonaffective psychotic disorder (including schizophrenia, schizophreniform disorder, and schizoaffective disorder), 3) fluent in Dutch, and 4) able and willing to give written informed consent. Eligible siblings had to fulfil the criteria of 1) age between 16 and 50 years, 2) fluent in Dutch, and 3) able and willing to give written informed consent. Eligible healthy control subjects had to fulfil the criteria of 1) age between 16 and 50 years, 2) no lifetime psychotic disorder and/or use of lithium medication (in the past), 3) no first- or second-degree family member with a lifetime psychotic disorder, 4) fluent in Dutch, and 5) able and willing to give written informed consent. Presence or absence of psychopathology was established by using the CASH. Diagnosis was based on the DSM-IV criteria. Of all subjects, urine was screened for cocaine, amphetamines, and for cannabis. Subjects with substance dependence/abuse (based on the criteria of the CIDI [sections B, J, and L]) and a major medical or neurological illness were excluded. Further information can be found in Boos <i>et al.</i> (26).</p>                                                                                                                                                                                                                                                                                                                                                                                                                                                                                                                                             |
| UMCU – Parents  | <p>Both parents of patients with schizophrenia were recruited at the University Medical Center Utrecht, as well as healthy control couples. The CASH, SADS-L, SIDP-IV, and the FIGS were obtained from all participants. Psychiatric diagnosis was established according to DSM-IV criteria. At least one of the children of the parents met DSM-IV criteria for schizophrenia on the basis of the CASH. Parents of patients were excluded if they had a history of psychotic illness. For control couples, exclusion followed in case of any axis-I DSM-IV diagnosis, or diagnosis of depression, manic depression, or psychotic disorder in first-degree family, or psychotic disorder in second-degree family. In both groups all participants were physically healthy and had no history of neurological illness, or drug or alcohol abuse. Further information can be found in Boos <i>et al.</i> (27).</p>                                                                                                                                                                                                                                                                                                                                                                                                                                                                                                                                                                                                                                                                                                                                                                                                                                                                                                      |



| Sample        | Inclusion criteria                                                                                                                                                                                                                                                                                                                                                                                                                                                                                                                                                                                                                                                                                                                                                                                                                                                                                                                                                                                                                                                                                                                                                                                                                                                                                                                                                                                                                                                                                                                                                                                                                                                                                                                                                                                                                                                                                                                                                                                                                                                                                                                                                                                                                                                                                                                                                                                                                                                                                                                                                                                                                                                                                                                                                                                                                                                                                                                                                                                                                                                                                                                                                                                                                                                                                                                                                                                                                          |
|---------------|---------------------------------------------------------------------------------------------------------------------------------------------------------------------------------------------------------------------------------------------------------------------------------------------------------------------------------------------------------------------------------------------------------------------------------------------------------------------------------------------------------------------------------------------------------------------------------------------------------------------------------------------------------------------------------------------------------------------------------------------------------------------------------------------------------------------------------------------------------------------------------------------------------------------------------------------------------------------------------------------------------------------------------------------------------------------------------------------------------------------------------------------------------------------------------------------------------------------------------------------------------------------------------------------------------------------------------------------------------------------------------------------------------------------------------------------------------------------------------------------------------------------------------------------------------------------------------------------------------------------------------------------------------------------------------------------------------------------------------------------------------------------------------------------------------------------------------------------------------------------------------------------------------------------------------------------------------------------------------------------------------------------------------------------------------------------------------------------------------------------------------------------------------------------------------------------------------------------------------------------------------------------------------------------------------------------------------------------------------------------------------------------------------------------------------------------------------------------------------------------------------------------------------------------------------------------------------------------------------------------------------------------------------------------------------------------------------------------------------------------------------------------------------------------------------------------------------------------------------------------------------------------------------------------------------------------------------------------------------------------------------------------------------------------------------------------------------------------------------------------------------------------------------------------------------------------------------------------------------------------------------------------------------------------------------------------------------------------------------------------------------------------------------------------------------------------|
| UMCU – UTWINS | <p>1.5T: Twin pairs discordant for schizophrenia, and healthy control twins were pairwise matched on zygosity, sex, age, and birth order took part in the study. Subjects were recruited in collaboration with psychiatric services and by advertisements in national newspapers. All subjects gave written informed consent to participate in the study. Zygosity was determined by DNA fingerprinting. Except for 1 control twin pair, all twins were reared together. The 1 control twin pair was separated at age 12 years when both their parents died. All subjects underwent extensive psychiatric assessment procedures using the CASH interview, the SADS-L, the Structured Interviews for DSM-III-R and DSM-IV, the FIGS, and a medical history inventory. Psychiatric diagnosis was established according to criteria of DSM- IV. The following subtypes were diagnosed in the twins with schizophrenia: paranoid, disorganized, undifferentiated, residual, and catatonic. Diagnoses in non-schizophrenic co-twins included paranoid personality disorder, schizotypal personality disorder, schizoid personality disorder, major depressive disorder, avoidant personality disorder, generalized anxiety disorder with a dependent personality disorder, and no psychiatric diagnoses. Moreover, some patients and co-twins had histories of substance or alcohol abuse. Healthy control twins had no schizophrenic spectrum disorders, no first-degree relatives with a history of psychiatric illness, and no second-degree relatives with a psychotic disorder. Two patients had never been on antipsychotic medication. Further information can be found in Baaré <i>et al.</i> (28).</p> <p>3T: U-TWIN consists of twins with discordance for schizophrenia and control twins. The control twins were selected to match the discordant twins on age, handedness, and parental educational level. There were more males in the discordant twin group compared with the control twins, which was corrected for statistically. Control twins were excluded if they ever met criteria for a psychotic or manic disorder or substance dependence, had a first-degree relative with schizophrenia, or were diagnosed as having a neurologic disorder. Zygosity of all twins was determined through testing polygenic genetic markers. The zygosity of incomplete pairs was known from participation in earlier studies. All subjects underwent psychiatric assessment by means of the CASH interview, symptom severity in the patients was assessed using the PANSS. Diagnoses were established using DSM-IV criteria. All but one patient received antipsychotic medication. The twins were recruited through the UMC Utrecht twin database, the participant database of the GROUP cohort, 3 national newspaper advertisement and local psychiatry clinics. All subjects from the previous cohort agreed to participate again in this new 3T MRI study; no data from previous measurements was used. The Medical Ethical Committee of the University Medical Center Utrecht approved this study, and the experiments were in accordance with the Declaration of Helsinki. All participants gave their written informed consent. The subject overlap with our previous twin cohort is 30.5% (and in case of overlap, only the 3T measurement was included). Further information can be found in Bohlken <i>et al.</i> (29).</p> |
| UNIBA         | <p>Participants included patients with schizophrenia, unaffected siblings and healthy subjects. All individuals were white Caucasian, from the province of Bari, and they were aged 18 to 65 years. The eligibility criteria for all participants were (a) IQ&gt;70; (b) no history of head trauma or loss of consciousness; (c) no current or lifetime history of medical or neurological disorders; (d) no lifetime history of substance use disorder; (e) no MRI contraindications (e.g. metal implants). Patients were required to fulfil diagnostic DSM-IV criteria for Schizophrenia, while unaffected relatives of schizophrenic patients and healthy volunteers were included if they had no lifetime history of psychiatric disorders.</p>                                                                                                                                                                                                                                                                                                                                                                                                                                                                                                                                                                                                                                                                                                                                                                                                                                                                                                                                                                                                                                                                                                                                                                                                                                                                                                                                                                                                                                                                                                                                                                                                                                                                                                                                                                                                                                                                                                                                                                                                                                                                                                                                                                                                                                                                                                                                                                                                                                                                                                                                                                                                                                                                                         |

Table S2. Sample image acquisition and image processing details

| Sample  | Number of Scanners | Scanner Vendor & Type               | Imaging Protocols                                                                                                                                                                                                                                                                                                                                          | Slice Orientation | Free-Surfer Version | Operating System/Linux Kernel Version           |
|---------|--------------------|-------------------------------------|------------------------------------------------------------------------------------------------------------------------------------------------------------------------------------------------------------------------------------------------------------------------------------------------------------------------------------------------------------|-------------------|---------------------|-------------------------------------------------|
| BPO_FLB | 1                  | 3.0T<br>Siemens Allegra             | T1-weighted scans were acquired using a three-dimensional magnetization prepared rapid gradient echo (3DMPRAGE) protocol with the following parameters. Repetition time (TR) = 1750 ms, echo time (TE) = 4.38 ms, flip angle = 8°, Slice thickness = 1mm, matrix size = 256 x 208 and voxel size = 1 mm.                                                   |                   | v5.3.0              |                                                 |
| C_SFS   | 1                  | 3T General Electric Discovery MR750 | Each scan consisted of a whole-brain T1-weighted 3D magnetization-prepared rapid gradient-echo (MP-RAGE) sequence with the following parameters: echo time (TE)=3.1ms, inversion time (TI)=650ms, repetition time (TR)=7.4ms, flip angle=11°, field of view (FOV)=25.6, matrix=256x256, slice thickness=1mm, 236 coronal slices.                           |                   | v6.0.0              |                                                 |
| Cardiff | 1                  | GE HDx 3T scanner                   | T1 - axial 3D fast spoiled gradient recalled (FSPGR) sequence (TR/TE/TI = 8/3/ 450 ms; Flip Angle = 200; acquisition matrix= 256(AP)x192(LR)x172(SI), 1mm isotropic voxels)                                                                                                                                                                                |                   | v5.3.0              | 3.0.80-0.7-default                              |
| CLING   | 1                  | 3T Magnetom TIM Trio                | MRI scanning was performed on a 3.0-Tesla Magnetom TIM Trio (Siemens, Erlangen, Germany). A T1-weighted, 3D magnetization prepared rapid gradient echo sequence (MPRAGE) (TR/TE/TI/FA=2250 ms/3.26 ms/900 ms/9°; image matrix = 256 x 256; duration 8 min and 26 sec) was acquired generating 192 sagittal slices with a voxel size of 1 mm <sup>3</sup> . | Sagittal          | v5.3.0              | Ubuntu 12.04:<br>2.6.32-<br>431.17.1.el6.x86_64 |
| DEU     | 1                  | 1.5 T Philips Tesla Achieva MRI     | 3D T1-fast field echo (FFE) axial images were acquired with the following parameters: repetition time (TR) =8.7 ms, echo time (TE) =4 ms, flip angle=8°, field of view (FOV) =230 mm x 220 mm, slice thickness=1 mm, number of signal averages (NSA) =1, matrix=192                                                                                        |                   | v5.3.0              | 2.6.32-<br>573.12.1.el6.x86_64                  |
| EGEU    | 1                  | Siemens 3T Magnetom Verio           | T1-weighted anatomical 3D (MP-RAGE) 1 mm <sup>3</sup> isotropic (FoV=256, TR=1600 msec, TE=221 msec, TI= 900 msec, FA=9°), matrix 256X256                                                                                                                                                                                                                  |                   | v5.3.0              | 2.6.32-<br>431.17.1.el6.x86_64                  |
| EHR5    | 1                  | 1T Siemens                          | scanned with a 1 Tesla 42 SPE Siemens MRI scanner (Siemens, Erlangen, Germany). 128 contiguous coronal T1-weighted slices (thickness 1.88 mm, field-of-view 250 × 250 mm) were obtained using a Magnetisation Prepared Rapid Acquisition of Gradient Echo (MPRAGE)sequence (TR=10ms, TE=4ms, TI=200ms, relaxation time 500ms).                             | Coronal           | v5.3.0              | Linux: 2.6.32-<br>754.2.1.e16.x86_64            |
| ENBD_UT | 1                  | Philips 3 Tesla                     | T1-weighted, axial, 25.6cm x 25.6 cm square field-of-view (1.0mm slice, Tr=1750msec, Te=4.4msec, Ti=900msec, flip=80, data acquisition matrix=256(phase)x256(frequency)x(160 slice).                                                                                                                                                                       |                   | v5.3.0              |                                                 |
| HHR     | 1                  | 1.5-Tesla<br>GE Signa               | We acquired T1-weighted SPGR (Spoiled Gradient Recalled) scans: flip angle=40°, TE=5 ms, TR=25 ms, FOV=24 cm x18 cm, matrix=256x160 pixels, NEX=1, no inter-slice gap, 124 coronal, 1.5 mm thick slices.                                                                                                                                                   |                   | v5.3.0              | macOS: Darwin<br>kernel 15.6.0                  |
| HUBIN   | 1                  | 1.5T GE Signa                       | 3D spoiled gradient recalled pulse sequence for T1-weighted images: 1.5 mm coronal slices, no gap, 35° flip angle, repetition time 24 ms, echo time 6.0 ms, number of excitations 2, field of view 24 cm, acquisition matrix 256 × 192.                                                                                                                    |                   | v5.3.0              | 3.13.0-79-generic                               |

| Sample              | Number of Scanners | Scanner Vendor & Type                  | Imaging Protocols                                                                                                                                                                                                                                                                                                                                                                                                                                                                       | Slice Orientation | Free-Surfer Version | Operating System/Linux Kernel Version   |
|---------------------|--------------------|----------------------------------------|-----------------------------------------------------------------------------------------------------------------------------------------------------------------------------------------------------------------------------------------------------------------------------------------------------------------------------------------------------------------------------------------------------------------------------------------------------------------------------------------|-------------------|---------------------|-----------------------------------------|
| IDIBAPS             | 1                  | Siemens Trio 3 T                       | 240 sagittal slices, 2,300-ms repetition time, 3.01-ms echo time, 1-mm slice thickness, 900-ms inversion time, 394x240 field of view, 256x256 matrix size, and 9 degrees flip angle.                                                                                                                                                                                                                                                                                                    |                   | v5.3.0              | 2.6.32.12-0.7;<br>3.0.76-0.11; 3.2.0-23 |
| IoP – BD            | 1                  | 1.5 Tesla GE N/Vi Signa System scanner | Coronal FSPGR. Matrix: 256 X 256, 124 slices with 1.5mm slice thickness. FOV: 220x160. Flip angle: 20°. Number of excitations: 1. No gap. RT=13.1ms echo time = 5.8ms TI=450ms. Matched to MFS.                                                                                                                                                                                                                                                                                         |                   | v5.3.0              | 2.6.32-358.6.2.el6.x86_64               |
| IoP – SZ            | 1                  | 1.5 Tesla GE N/Vi Signa System scanner | Participants underwent MRI scanning on a General Electric Signa Advantage scanner at 1.5 Tesla. A 3-dimensional T1-weighted, coronal, spoiled gradient (SPGR) of the whole head was obtained (TE=5ms, TR=35ms, flip angle=30°, NEX=1, FOV=200x200mm, voxel dimensions=1x1x1.5mm), yielding 124 contiguous slices 1.5mm thick. Imaging took place on identical scanners with identical protocols at either of two sites (St Georges Hospital, London, or The Maudsley Hospital, London). |                   | v5.3.0              | 2.6.32-358.6.2.el6.x86_64               |
| LIBD                | 1                  | 1.5T GE                                | T1-weighted spoiled gradient recalled sequence (spgr). Repetition time, 24 milliseconds; echo time, 5 milliseconds; number of excitations, 1; flip angle, 45 degrees; matrix size 256 x 256; field of view, 24 x 24 cm; 124 sagittal slices (0.94 x 0.94 x 1.5 mm).                                                                                                                                                                                                                     | Sagittal          | v5.0.0              | Linux: 2.6.32-696.23.1.el6.x86_64       |
| Maastricht – GROUP  | 1                  | 3T Siemens Magnetom Allegra            | Modified Driven Equilibrium Fourier Transform sequence (MDEFT); TR=7.92msec, TE=2.4msec, IR=910msec, flip angle=15°, FOV=256x240. Acquisition Matrix=256x240x176 (1 x 1 x 1mm). Magnetisation Prepared Rapid Acquisition of Gradient Echo (MPRAGE); TR=2250msec, TE=2.6msec, IR=900msec, flip angle=9°, FOV=256x256. Acquisition Matrix=256x256x192 (1 x 1 x 1mm).                                                                                                                      |                   | v5.3.0              | macOS: 10.8.0                           |
| MFS                 | 1                  | 1.5T GE N/Vi Signa System              | 3D T1-weighted spoiled gradient recall echo sequence (SPGR). TR=13.1 ms, TI=450 ms, TE=5.8 ms, number of excitations=1, flip angle=20°, acquisition matrix=256X256X128, 1.5mm thick contiguous coronal slices.                                                                                                                                                                                                                                                                          |                   | v5.3.0              | 3.0.0-21-generic                        |
| MooDS               | 1                  | Siemens Trio 3T                        | T1-weighted anatomical 3D (MP-RAGE) 1 mm3 isotropic (FoV=192, TR=1.57 s, TE=2.74 ms, FA=15°)                                                                                                                                                                                                                                                                                                                                                                                            |                   | v5.3.0              | 4.4.0-142-generic                       |
| MSSM                | 1                  | 1.5T GE Signa                          | 3D T1-weighted spoiled gradient recalled acquisition in steady state; Voxel Size: 0.9375x0.9375x1.5mm3, TR/TE/TI=5.1/18/450 ms, Flip Angle: 20°.                                                                                                                                                                                                                                                                                                                                        | Axial             | v5.3.0              | 2.6.32-358.6.2.el6.x86_64               |
| NU                  | 1                  | SIEMENS VISION 1.5T                    | MPRAGE; 1.25mm x1mm x1mm; TR: 9.70 msec, TE: 4.00 msec, TI: 20.00 msec, flip angle: 10.00 degrees, FOV: 256                                                                                                                                                                                                                                                                                                                                                                             |                   | v5.3.0              |                                         |
| Olin                | 1                  | Siemens Magnetom Allegra 3T            | 3D magnetization-prepared rapid gradient-echo (MPRage) sequence: TI=766; TR=2200; TE=4.13; flip angle 13 deg; FOV 256 mm; 0.8mm iso; axial slices parallel to the AC-PC line. To increase signal-to-noise ratio, four volumes were acquired per subject.                                                                                                                                                                                                                                |                   | v5.3.0              | Linux: 2.6.32-504.16.2.el6.x86_64       |
| PHHR                | 1                  | 1.5-Tesla GE Signa                     | We acquired T1-weighted SPGR (Spoiled Gradient Recalled) scans: flip angle=40°, TE=5 ms, TR=25 ms, FOV=24 cm x18 cm, matrix=256x160 pixels, NEX=1, no inter-slice gap, 124 coronal, 1.5 mm thick slices.                                                                                                                                                                                                                                                                                |                   | v5.3.0              | macOS: Darwin kernel 15.6.0             |
| SydneyBipolar Group | 1                  | Philips Achieva 3T                     | 180 T1-weighted 3D turbo field-echo images were acquired sagittally (TR=5.5msec, TE=2.5ms, flip angle=8°, field of view=256x256x180mm, voxel size=1x1x1mm, scan time=371s).                                                                                                                                                                                                                                                                                                             | Sagittal          | v5.3.0              | Linux: 2.6.32-504.3.3.el6.x86_64        |

| Sample                        | Number of Scanners | Scanner Vendor & Type              | Imaging Protocols                                                                                                                                                                                                                                                                                                                                                                                                                                                                                     | Slice Orientation | Free-Surfer Version | Operating System/Linux Kernel Version |
|-------------------------------|--------------------|------------------------------------|-------------------------------------------------------------------------------------------------------------------------------------------------------------------------------------------------------------------------------------------------------------------------------------------------------------------------------------------------------------------------------------------------------------------------------------------------------------------------------------------------------|-------------------|---------------------|---------------------------------------|
| STAR (Swedish) BD twin cohort | 1                  | GE 1.5T Signa                      | T1 - sagittal irSPGR sequence, 1mm3 isotropic voxels, 256mm FOV, TR/TE = 25/6 msec, 35 degree flip                                                                                                                                                                                                                                                                                                                                                                                                    |                   | v5.3.0              | 3.10.0-693.43.1.el7.x86_64            |
| STAR (Swedish) SZ twin cohort | 1                  | GE 1.5T Signa                      | T1 - sagittal irSPGR sequence, 1mm3 isotropic voxels, 256mm FOV, TR/TE = 25/6 msec, 35 degree flip                                                                                                                                                                                                                                                                                                                                                                                                    |                   | v5.3.0              | 3.10.0-693.43.1.el7.x86_64            |
| UMCG – GROUP                  | 1                  | 3.0 T scanner Philips Intera       | Imaging data were acquired using a 3.0 T scanner (Philips Intera) at the University Medical Center Groningen or at the Academic Medical Center in Amsterdam, the Netherlands. Both systems were equipped with an 8-SENSE head coil, and anatomic images were obtained using a sagittal 3-dimensional T1-weighted sequence (176 slices, repetition time 9 ms, echo time 3.5 ms, field of view 256 mm, voxel size 1 × 1 × 1 mm, slice thickness 1.0 mm).                                                |                   | v6.0.0              | 3.10.0-693.2.2.el7.x86_64             |
| UMCU – BD twins               | 1                  | 1.5T Philips NT                    | The acquired scans were T1-weighted, 3-dimensional, fast-field echo scans with 160-180 contiguous coronal slices (256×256 matrix, echo time = 4.6ms, repetition time = 30ms, flip angle = 30°, 1×1×1.2 mm3 voxels, field of view = 256mm/70%).                                                                                                                                                                                                                                                        |                   | v5.1.0              | 2.6.32-358.6.2.el6.x86_64             |
| UMCU – DBSOS                  | 1                  | 3T Philips Achieva                 | The T1-weighted 3-dimensional fast-field echo scans were acquired with the following parameters: 220 0.8 mm contiguous slices, echo time = 4.6 ms, repetition time = 10 ms, flip angle = 8°, in-plane voxel size 0.75x0.75 mm <sup>2</sup> .                                                                                                                                                                                                                                                          |                   | v5.3.0              | 2.6.32-358.6.2.el6.x86_64             |
| UMCU – GROUP                  | 1                  | 1.5T Philips Achieva               | The acquired scans were T1-weighted, 3-dimensional, fast-field echo scans with 160-180 contiguous coronal slices (256×256 matrix, echo time = 4.6ms, repetition time = 30ms, flip angle = 30°, 1×1×1.2 mm3 voxels, field of view = 256mm/70%).                                                                                                                                                                                                                                                        |                   | v5.1.0              | 2.6.32-358.6.2.el6.x86_64             |
| UMCU – Parents                | 1                  | 1.5T Philips NT                    | The acquired scans were T1-weighted, 3-dimensional, fast-field echo scans with 160-180 contiguous coronal slices (256×256 matrix, echo time = 4.6ms, repetition time = 30ms, flip angle = 30°, 1×1×1.2 mm3 voxels, field of view = 256mm/70%).                                                                                                                                                                                                                                                        |                   | v5.3.0              | 2.6.32-358.6.2.el6.x86_64             |
| UMCU – UTWINS                 | 2                  | 1.5T Philips NT/3T Philips Achieva | 1.5T: The acquired scans were T1-weighted, 3-dimensional, fast-field echo scans with 160-180 contiguous coronal slices (256×256 matrix, echo time = 4.6ms, repetition time = 30ms, flip angle = 30°, 1×1×1.2 mm3 voxels, field of view = 256mm/70%). 3T: The T1-weighted 3-dimensional fast-field echo scans were acquired with the following parameters: 220 0.8 mm contiguous slices, echo time = 4.6 ms, repetition time = 10 ms, flip angle = 8°, in-plane voxel size 0.75x0.75 mm <sup>2</sup> . |                   | v5.3.0              | 2.6.32-358.6.2.el6.x86_64             |
| UNIBA                         | 1                  | GE 3T                              | 124 1.3-mm slices using 3D T1-weighted gradient echo fast SPGR sequence (TE=min full; flip angle, 6°; prep time, 725; field of view, 250 mm; bandwidth, 31.25; matrix, 256 x 256)                                                                                                                                                                                                                                                                                                                     |                   | v5.3.0              | 4.4.0-116-generic                     |

**Table S3.** Global and subcortical brain measures differences (Cohen's *d* effect sizes [ $\pm$  95% CI]) between controls and (from left to right) FDRs-BD, patients with bipolar disorder, FDRs-SZ, patients with schizophrenia. Last column displays whether the effect sizes differed significantly between FDRs-BD and FDRs-SZ and between BD and SZ patients.

|                            | BIPOLAR DISORDER             |                                          | SCHIZOPHRENIA                |                             | <i>Significant differences</i>  |
|----------------------------|------------------------------|------------------------------------------|------------------------------|-----------------------------|---------------------------------|
|                            | Relatives<br>ES $\pm$ 95% CI | Patients <sup>#</sup><br>ES $\pm$ 95% CI | Relatives<br>ES $\pm$ 95% CI | Patients<br>ES $\pm$ 95% CI |                                 |
| <i>Global measures</i>     |                              |                                          |                              |                             |                                 |
| ICV                        | 0.16 [0.06, 0.27]**          | 0.04 [-0.12, 0.20]                       | -0.01 [-0.11, 0.09]          | -0.12 [-0.30, 0.06]         | BD rel > SZ rel   BD pt > SZ pt |
| Total brain                | 0.11 [0.00, 0.22]*           | -0.13 [-0.30, 0.04]                      | -0.10 [-0.20, -0.00]*        | -0.40 [-0.59, -0.21]**      | BD rel > SZ rel   BD pt > SZ pt |
| Surface area               | 0.15 [0.03, 0.27]*           | 0.08 [-0.10, 0.25]                       | -0.01 [-0.12, 0.10]          | -0.21 [-0.45, 0.03]         | BD rel > SZ rel   BD pt > SZ pt |
| Cortical thickness         | -0.01 [-0.11, 0.09]          | -0.35 [-0.60, -0.11]**                   | -0.13 [-0.24, -0.02]*        | -0.62 [-0.76, -0.48]**      | BD rel > SZ rel   BD pt > SZ pt |
| Cortical gray matter       | 0.15 [0.04, 0.27]*           | -0.08 [-0.25, 0.10]                      | -0.08 [-0.19, 0.04]          | -0.48 [-0.65, -0.31]**      | BD rel > SZ rel   BD pt > SZ pt |
| Cerebral white matter      | 0.06 [-0.05, 0.17]           | -0.10 [-0.27, 0.07]                      | -0.09 [-0.17, -0.01]*        | -0.27 [-0.43, -0.10]**      | BD rel > SZ rel   BD pt > SZ pt |
| Cerebellum gray matter†    | 0.13 [0.01, 0.25]*           | -0.19 [-0.35, -0.02]*                    | -0.10 [-0.17, -0.02]*        | -0.26 [-0.40, -0.13]**      | BD rel > SZ rel                 |
| Cerebellum white matter†   | 0.00 [-0.13, 0.14]           | -0.13 [-0.25, -0.01]*                    | -0.10 [-0.17, -0.02]*        | -0.18 [-0.34, -0.02]**      |                                 |
| Third ventricle            | -0.01 [-0.11, 0.10]          | 0.32 [0.06, 0.58]*                       | 0.14 [0.03, 0.25]*           | 0.51 [0.38, 0.65]**         | BD rel < SZ rel   BD pt < SZ pt |
| Lateral ventricles         | 0.14 [0.04, 0.23]*           | 0.31 [0.03, 0.60]*                       | 0.07 [-0.01, 0.15]           | 0.33 [0.17, 0.49]**         |                                 |
| <i>Subcortical volumes</i> |                              |                                          |                              |                             |                                 |
| Thalamus                   | 0.02 [-0.08, 0.12]           | -0.33 [-0.54, -0.12]**                   | -0.12 [-0.19, -0.04]**       | -0.32 [-0.45, -0.18]**      | BD rel > SZ rel                 |
| Caudate                    | 0.08 [-0.01, 0.17]           | -0.07 [-0.23, 0.10]                      | -0.04 [-0.12, 0.04]          | 0.16 [0.00, 0.31]**         | BD rel > SZ rel   BD pt < SZ pt |
| Putamen                    | 0.01 [-0.09, 0.12]           | -0.08 [-0.35, 0.18]                      | -0.07 [-0.15, -0.00]*        | 0.25 [0.12, 0.38]**         | BD pt < SZ pt                   |
| Pallidum                   | 0.05 [-0.06, 0.15]           | 0.09 [-0.07, 0.26]                       | -0.05 [-0.12, 0.02]          | 0.40 [0.25, 0.55]**         | BD pt < SZ pt                   |
| Hippocampus                | 0.02 [-0.07, 0.11]           | -0.20 [-0.37, -0.02]*                    | -0.07 [-0.15, 0.00]          | -0.49 [-0.57, -0.40]**      | BD pt > SZ pt                   |
| Amygdala                   | 0.07 [-0.02, 0.16]           | -0.13 [-0.33, 0.08]                      | -0.01 [-0.12, 0.11]          | -0.33 [-0.41, -0.24]**      | BD pt > SZ pt                   |
| Accumbens                  | 0.07 [-0.05, 0.19]           | -0.20 [-0.45, 0.06]                      | -0.07 [-0.15, 0.01]          | -0.25 [-0.38, -0.13]**      | BD rel > SZ rel                 |

\*  $p < 0.05$ , uncorrected | \*\*  $q < 0.05$ , corrected | † excluded Olin in cerebellum analyses | # lithium corrected

**Table S4.** Global and subcortical brain measures differences (Cohen's *d* effect sizes [ $\pm$  95% CI]) between controls and (from left to right) FDRs-BD, patients with bipolar disorder, FDRs-SZ, patients with schizophrenia, controlling for intracranial volume (ICV). Last column displays whether the effect sizes differed significantly between FDRs-BD and FDRs-SZ and between BD and SZ patients.

| <i>Corrected for ICV</i>   | BIPOLAR DISORDER             |                                          | SCHIZOPHRENIA                |                             | Significant differences                          |
|----------------------------|------------------------------|------------------------------------------|------------------------------|-----------------------------|--------------------------------------------------|
|                            | Relatives<br>ES $\pm$ 95% CI | Patients <sup>#</sup><br>ES $\pm$ 95% CI | Relatives<br>ES $\pm$ 95% CI | Patients<br>ES $\pm$ 95% CI |                                                  |
| <i>Global measures</i>     |                              |                                          |                              |                             |                                                  |
| ICV                        | -                            | -                                        | -                            | -                           |                                                  |
| Total brain                | 0.00 [-0.11, 0.11]           | -0.36 [-0.54, -0.18]**                   | -0.16 [-0.23, -0.09]**       | -0.57 [-0.74, -0.39]**      | BD rel > SZ rel   BD pt > SZ pt   SZ rel > SZ pt |
| Surface area               | 0.06 [-0.05, 0.16]           | 0.03 [-0.17, 0.23]                       | -0.03 [-0.11, 0.06]          | -0.22 [-0.41, -0.03]**      | BD pt > SZ pt                                    |
| Cortical thickness         | 0.00 [-0.10, 0.09]           | -0.37 [-0.62, -0.12]**                   | -0.13 [-0.25, -0.02]**       | -0.63 [-0.77, -0.49]**      | BD rel > SZ rel   BD pt > SZ pt                  |
| Cortical gray matter       | 0.06 [-0.04, 0.16]           | -0.22 [-0.41, -0.04]**                   | -0.11 [-0.21, -0.02]**       | -0.62 [-0.76, -0.47]**      | BD rel > SZ rel   BD pt > SZ pt                  |
| Cerebral white matter      | -0.07 [-0.18, 0.04]          | -0.25 [-0.41, -0.10]**                   | -0.12 [-0.19, -0.04]**       | -0.29 [-0.45, -0.13]**      |                                                  |
| Cerebellum gray matter†    | 0.07 [-0.04, 0.18]           | -0.26 [-0.40, -0.13]**                   | -0.09 [-0.16, -0.02]**       | -0.25 [-0.37, -0.13]**      | BD rel > SZ rel                                  |
| Cerebellum white matter†   | -0.08 [-0.22, 0.06]          | -0.21 [-0.33, -0.09]**                   | -0.09 [-0.17, -0.02]**       | -0.16 [-0.29, -0.04]**      |                                                  |
| Third ventricle            | -0.06 [-0.15, 0.03]          | 0.29 [0.00, 0.58]*                       | 0.15 [0.04, 0.26]**          | 0.56 [0.43, 0.70]**         | BD rel < SZ rel   BD pt < SZ pt   SZ rel < SZ pt |
| Lateral ventricles         | 0.08 [-0.03, 0.19]           | 0.29 [-0.04, 0.61]                       | 0.09 [0.00, 0.18]*           | 0.38 [0.21, 0.55]**         |                                                  |
| <i>Subcortical volumes</i> |                              |                                          |                              |                             |                                                  |
| Thalamus                   | -0.07 [-0.18, 0.03]          | -0.45 [-0.66, -0.25]**                   | -0.13 [-0.23, -0.03]**       | -0.32 [-0.41, -0.23]**      | BD pt < SZ pt                                    |
| Caudate                    | 0.01 [-0.09, 0.10]           | -0.12 [-0.29, 0.04]                      | -0.03 [-0.11, 0.04]          | 0.22 [0.10, 0.35]**         | BD pt < SZ pt                                    |
| Putamen                    | -0.04 [-0.13, 0.05]          | -0.12 [-0.37, 0.12]                      | -0.07 [-0.14, 0.01]          | 0.33 [0.22, 0.44]**         | BD pt < SZ pt                                    |
| Pallidum                   | -0.01 [-0.12, 0.09]          | 0.06 [-0.10, 0.22]                       | -0.05 [-0.12, 0.02]          | 0.47 [0.32, 0.61]**         | BD pt < SZ pt                                    |
| Hippocampus                | -0.04 [-0.15, 0.07]          | -0.26 [-0.43, -0.09]**                   | -0.06 [-0.14, 0.01]          | -0.49 [-0.57, -0.40]**      | BD pt > SZ pt                                    |
| Amygdala                   | 0.01 [-0.08, 0.10]           | -0.22 [-0.47, 0.03]                      | 0.00 [-0.11, 0.11]           | -0.32 [-0.40, -0.23]**      |                                                  |
| Accumbens                  | 0.02 [-0.09, 0.14]           | -0.24 [-0.47, -0.01]*                    | -0.05 [-0.13, 0.02]          | -0.21 [-0.32, -0.11]**      |                                                  |

\*  $p < 0.05$ , uncorrected | \*\*  $q < 0.05$ , corrected | † excluded Olin in cerebellum analyses | # lithium corrected

**Table S5.** Global and subcortical brain measures differences (Cohen's  $d$  effect sizes [ $\pm$  95% CI]) between controls and FDRs-BD and FDRs-SZ, controlling for psychopathology in relatives and/or controls by i) adding the presence of a diagnosis (not BD or SZ) as a covariate, ii) comparing only the *healthy* relatives with the *healthy* controls.

| <u>Corrected for psychopathology</u> | BIPOLAR DISORDER                |                                     | SCHIZOPHRENIA                   |                                     |
|--------------------------------------|---------------------------------|-------------------------------------|---------------------------------|-------------------------------------|
|                                      | i) Covariate<br>ES $\pm$ 95% CI | ii) Healthy only<br>ES $\pm$ 95% CI | i) Covariate<br>ES $\pm$ 95% CI | ii) Healthy only<br>ES $\pm$ 95% CI |
| <i>Global measures</i>               |                                 |                                     |                                 |                                     |
| ICV                                  | 0.18 [0.07, 0.28]**             | 0.16 [0.05, 0.27]**                 | 0.00 [-0.10, 0.10]              | 0.00 [-0.11, 0.12]                  |
| Total brain                          | 0.13 [0.02, 0.24]*              | 0.13 [0.01, 0.25]*                  | -0.08 [-0.17, 0.01]             | -0.07 [-0.17, 0.04]                 |
| Surface area                         | 0.17 [0.05, 0.28]**             | 0.18 [0.06, 0.31]**                 | 0.01 [-0.10, 0.11]              | 0.01 [-0.11, 0.13]                  |
| Cortical thickness                   | 0.00 [-0.09, 0.10]              | -0.02 [-0.13, 0.09]                 | -0.12 [-0.23, -0.02]*           | -0.12 [-0.22, -0.02]*               |
| Cortical gray matter                 | 0.17 [0.06, 0.28]**             | 0.18 [0.06, 0.30]**                 | -0.06 [-0.17, 0.05]             | -0.05 [-0.16, 0.06]                 |
| Cerebral white matter                | 0.07 [-0.04, 0.18]              | 0.08 [-0.04, 0.19]                  | -0.07 [-0.14, 0.01]             | -0.07 [-0.16, 0.03]                 |
| Cerebellum gray matter†              | 0.15 [0.03, 0.28]*              | 0.15 [0.01, 0.29]*                  | -0.09 [-0.16, -0.01]*           | -0.07 [-0.15, 0.02]                 |
| Cerebellum white matter†             | 0.01 [-0.12, 0.13]              | 0.01 [-0.13, 0.15]                  | -0.09 [-0.17, -0.02]*           | -0.08 [-0.17, -0.00]*               |
| Third ventricle                      | 0.00 [-0.11, 0.10]              | 0.00 [-0.13, 0.13]                  | 0.15 [0.03, 0.27]*              | 0.16 [0.03, 0.28]*                  |
| Lateral ventricles                   | 0.13 [0.03, 0.23]*              | 0.11 [0.00, 0.21]*                  | 0.08 [-0.01, 0.17]              | 0.08 [-0.03, 0.18]                  |
| <i>Subcortical volumes</i>           |                                 |                                     |                                 |                                     |
| Thalamus                             | 0.03 [-0.07, 0.13]              | 0.04 [-0.08, 0.15]                  | -0.11 [-0.18, -0.03]*           | -0.11 [-0.19, -0.03]*               |
| Caudate                              | 0.09 [-0.00, 0.18]              | 0.04 [-0.06, 0.15]                  | -0.02 [-0.10, 0.06]             | -0.04 [-0.13, 0.05]                 |
| Putamen                              | 0.02 [-0.09, 0.13]              | 0.00 [-0.11, 0.11]                  | -0.06 [-0.14, 0.01]             | -0.07 [-0.15, 0.01]                 |
| Pallidum                             | 0.06 [-0.05, 0.17]              | 0.06 [-0.06, 0.19]                  | -0.04 [-0.11, 0.03]             | -0.04 [-0.13, 0.05]                 |
| Hippocampus                          | 0.01 [-0.08, 0.10]              | 0.02 [-0.08, 0.12]                  | -0.07 [-0.14, 0.00]             | -0.08 [-0.16, -0.00]*               |
| Amygdala                             | 0.08 [-0.01, 0.17]              | 0.09 [-0.01, 0.19]                  | 0.00 [-0.11, 0.10]              | -0.01 [-0.12, 0.10]                 |
| Accumbens                            | 0.08 [-0.03, 0.19]              | 0.09 [-0.04, 0.22]                  | -0.07 [-0.17, 0.02]             | -0.07 [-0.17, 0.02]                 |

\*  $p < 0.05$ , uncorrected | \*\*  $q < 0.05$ , corrected | † excluded Olin in cerebellum analyses

**Table S6.** Global and subcortical brain measures differences (Cohen's *d* effect sizes [ $\pm$  95% CI]) between controls and FDRs-BD and FDRs-SZ, controlling for intracranial volume (ICV) and psychopathology in relatives and/or controls by i) adding the presence of a diagnosis (not BD or SZ) as a covariate, ii) comparing only the *healthy* relatives with the *healthy* controls.

| <i>Corrected for<br/>psychopathology and ICV</i> | BIPOLAR DISORDER                |                                     | SCHIZOPHRENIA                   |                                     |
|--------------------------------------------------|---------------------------------|-------------------------------------|---------------------------------|-------------------------------------|
|                                                  | i) Covariate<br>ES $\pm$ 95% CI | ii) Healthy only<br>ES $\pm$ 95% CI | i) Covariate<br>ES $\pm$ 95% CI | ii) Healthy only<br>ES $\pm$ 95% CI |
| <i>Global measures</i>                           |                                 |                                     |                                 |                                     |
| ICV                                              | -                               | -                                   | -                               | -                                   |
| Total brain                                      | 0.01 [-0.10, 0.13]              | 0.05 [-0.07, 0.16]                  | -0.13 [-0.21, -0.06]**          | -0.14 [-0.22, -0.06]**              |
| Surface area                                     | 0.07 [-0.04, 0.18]              | 0.11 [-0.00, 0.22]                  | -0.01 [-0.10, 0.08]             | -0.01 [-0.11, 0.08]                 |
| Cortical thickness                               | 0.00 [-0.09, 0.09]              | -0.01 [-0.11, 0.10]                 | -0.13 [-0.24, -0.02]**          | -0.12 [-0.22, -0.01]*               |
| Cortical gray matter                             | 0.08 [-0.01, 0.17]              | 0.12 [0.01, 0.22]*                  | -0.09 [-0.19, -0.00]*           | -0.09 [-0.17, 0.00]                 |
| Cerebral white matter                            | -0.07 [-0.19, 0.05]             | -0.05 [-0.16, 0.06]                 | -0.09 [-0.17, -0.02]**          | -0.11 [-0.19, -0.03]*               |
| Cerebellum gray matter†                          | 0.09 [-0.03, 0.21]              | 0.09 [-0.05, 0.22]                  | -0.09 [-0.16, -0.01]**          | -0.07 [-0.15, 0.01]                 |
| Cerebellum white matter†                         | -0.09 [-0.22, 0.04]             | -0.07 [-0.22, 0.07]                 | -0.09 [-0.17, -0.02]**          | -0.09 [-0.17, -0.01]*               |
| Third ventricle                                  | -0.06 [-0.16, 0.04]             | -0.06 [-0.18, 0.06]                 | 0.16 [0.05, 0.28]**             | 0.16 [0.05, 0.28]**                 |
| Lateral ventricles                               | 0.07 [-0.04, 0.19]              | 0.05 [-0.07, 0.17]                  | 0.09 [0.01, 0.18]*              | 0.09 [-0.00, 0.18]                  |
| <i>Subcortical volumes</i>                       |                                 |                                     |                                 |                                     |
| Thalamus                                         | -0.06 [-0.16, 0.03]             | -0.04 [-0.15, 0.08]                 | -0.13 [-0.23, -0.03]**          | -0.13 [-0.25, -0.02]*               |
| Caudate                                          | 0.02 [-0.08, 0.11]              | -0.02 [-0.13, 0.09]                 | -0.02 [-0.09, 0.05]             | -0.05 [-0.13, 0.03]                 |
| Putamen                                          | -0.04 [-0.13, 0.05]             | -0.05 [-0.16, 0.05]                 | -0.06 [-0.13, 0.01]             | -0.07 [-0.16, 0.01]                 |
| Pallidum                                         | 0.00 [-0.11, 0.11]              | 0.02 [-0.12, 0.15]                  | -0.04 [-0.12, 0.03]             | -0.06 [-0.14, 0.02]                 |
| Hippocampus                                      | -0.06 [-0.18, 0.06]             | -0.04 [-0.16, 0.08]                 | -0.06 [-0.13, 0.01]             | -0.08 [-0.16, 0.00]                 |
| Amygdala                                         | 0.01 [-0.08, 0.10]              | 0.03 [-0.07, 0.14]                  | 0.01 [-0.10, 0.11]              | -0.01 [-0.12, 0.10]                 |
| Accumbens                                        | 0.03 [-0.08, 0.14]              | 0.04 [-0.08, 0.16]                  | -0.06 [-0.15, 0.03]             | -0.06 [-0.14, 0.02]                 |

\*  $p < 0.05$ , uncorrected | \*\*  $q < 0.05$ , corrected | † excluded Olin in cerebellum analyses



**Table S7a.** Global and subcortical brain measures differences (Cohen's  $d$  effect sizes [ $\pm$  95% CI]) between controls and the different types of FDRs-BD, i.e. MZ co-twins, DZ co-twins, offspring, siblings, and parents. Last column displays whether the effect sizes differ significantly from each other, pairwise.

| BIPOLAR DISORDER           | MZ co-twins<br>ES $\pm$ 95%CI | DZ co-twins<br>ES $\pm$ 95%CI | Offspring<br>ES $\pm$ 95%CI | Siblings†<br>ES $\pm$ 95%CI | Parents <sup>1</sup><br>ES $\pm$ 95%CI | Significant differences |
|----------------------------|-------------------------------|-------------------------------|-----------------------------|-----------------------------|----------------------------------------|-------------------------|
| <i>Global measures</i>     |                               |                               |                             |                             |                                        |                         |
| ICV                        | 0.21 [-0.12, 0.54]            | 0.15 [-0.16, 0.45]            | 0.19 [-0.00, 0.39]          | 0.10 [-0.05, 0.26]          | 0.10 [-0.44, 0.63]                     |                         |
| Total brain                | 0.07 [-0.26, 0.40]            | 0.04 [-0.27, 0.35]            | 0.11 [-0.11, 0.33]          | 0.13 [-0.04, 0.31]          | -0.07 [-0.61, 0.46]                    |                         |
| Surface area               | 0.04 [-0.29, 0.37]            | 0.05 [-0.26, 0.35]            | 0.15 [-0.08, 0.39]          | 0.18 [-0.02, 0.39]          | 0.22 [-0.31, 0.76]                     |                         |
| Cortical thickness         | 0.12 [-0.27, 0.51]            | -0.03 [-0.34, 0.28]           | -0.07 [-0.30, 0.16]         | -0.02 [-0.17, 0.13]         | 0.13 [-0.41, 0.66]                     |                         |
| Cortical gray matter       | 0.19 [-0.14, 0.52]            | 0.03 [-0.28, 0.34]            | 0.14 [-0.09, 0.37]          | 0.17 [-0.03, 0.37]          | 0.30 [-0.23, 0.84]                     |                         |
| Cerebral white matter      | -0.03 [-0.36, 0.30]           | 0.04 [-0.26, 0.35]            | 0.08 [-0.12, 0.27]          | 0.08 [-0.10, 0.27]          | -0.22 [-0.75, 0.32]                    |                         |
| Cerebellum gray matter†    | 0.09 [-0.24, 0.42]            | 0.08 [-0.23, 0.38]            | 0.10 [-0.19, 0.39]          | 0.13 [-0.03, 0.30]          | -0.18 [-0.71, 0.36]                    |                         |
| Cerebellum white matter†   | 0.00 [-0.34, 0.35]            | -0.10 [-0.66, 0.45]           | -0.04 [-0.34, 0.25]         | 0.05 [-0.12, 0.22]          | -0.10 [-0.63, 0.44]                    |                         |
| Third ventricle            | 0.19 [-0.42, 0.80]            | 0.05 [-0.26, 0.35]            | -0.05 [-0.28, 0.17]         | -0.05 [-0.20, 0.10]         | 0.38 [-0.16, 0.92]                     |                         |
| Lateral ventricles         | 0.26 [-0.29, 0.82]            | 0.16 [-0.15, 0.47]            | 0.20 [0.06, 0.33]*          | 0.00 [-0.15, 0.15]          | 0.76 [0.21, 1.30]*                     | OFF > SIB               |
| <i>Subcortical volumes</i> |                               |                               |                             |                             |                                        |                         |
| Thalamus                   | -0.18 [-0.54, 0.18]           | -0.01 [-0.32, 0.30]           | 0.06 [-0.11, 0.23]          | 0.04 [-0.11, 0.19]          | -0.47 [-1.01, 0.07]                    |                         |
| Caudate                    | 0.18 [-0.16, 0.51]            | 0.17 [-0.14, 0.48]            | 0.09 [-0.05, 0.24]          | 0.05 [-0.11, 0.21]          | -0.30 [-0.84, 0.23]                    |                         |
| Putamen                    | 0.07 [-0.30, 0.45]            | 0.11 [-0.39, 0.61]            | 0.05 [-0.12, 0.22]          | -0.04 [-0.22, 0.14]         | -0.08 [-0.61, 0.46]                    |                         |
| Pallidum                   | 0.03 [-0.31, 0.37]            | 0.09 [-0.36, 0.53]            | 0.06 [-0.12, 0.24]          | 0.09 [-0.06, 0.24]          | -0.75 [-1.30, -0.20]*                  |                         |
| Hippocampus                | 0.02 [-0.32, 0.35]            | -0.03 [-0.33, 0.28]           | -0.04 [-0.19, 0.12]         | 0.14 [-0.01, 0.29]          | -0.46 [-1.00, 0.08]                    | OFF < SIB               |
| Amygdala                   | 0.18 [-0.15, 0.51]            | 0.05 [-0.26, 0.35]            | 0.04 [-0.10, 0.18]          | 0.10 [-0.05, 0.25]          | -0.01 [-0.54, 0.52]                    |                         |
| Accumbens                  | -0.20 [-0.61, 0.21]           | 0.07 [-0.23, 0.38]            | 0.11 [-0.10, 0.32]          | 0.11 [-0.09, 0.31]          | -0.09 [-0.62, 0.45]                    |                         |

\*  $p < 0.05$ , uncorrected | \*\*  $q < 0.05$ , corrected | † excluded Olin in cerebellum analyses | <sup>1</sup> Parents only 1 cohort; no meta-analysis

**Table S7b.** Global and subcortical brain measures differences (Cohen's  $d$  effect sizes [ $\pm$  95% CI]) between controls and the different types of FDRs-SZ, i.e. MZ co-twins, DZ co-twins, offspring, siblings, and parents. Last column displays whether the effect sizes differ significantly from each other, pairwise.

| SCHIZOPHRENIA              | MZ co-twins<br>ES $\pm$ 95%CI | DZ co-twins<br>ES $\pm$ 95%CI | Offspring<br>ES $\pm$ 95%CI | Siblings<br>ES $\pm$ 95%CI | Parents<br>ES $\pm$ 95%CI | Significant differences                                 |
|----------------------------|-------------------------------|-------------------------------|-----------------------------|----------------------------|---------------------------|---------------------------------------------------------|
| <i>Global measures</i>     |                               |                               |                             |                            |                           |                                                         |
| ICV                        | -0.12 [-0.42, 0.18]           | -0.03 [-0.31, 0.24]           | -0.20 [-0.52, 0.11]         | 0.09 [-0.08, 0.26]         | -0.04 [-0.30, 0.22]       | OFF < SIB                                               |
| Total brain                | -0.25 [-0.56, 0.06]           | -0.14 [-0.41, 0.14]           | -0.33 [-0.67, 0.01]         | -0.01 [-0.13, 0.11]        | -0.10 [-0.46, 0.27]       | OFF < SIB                                               |
| Surface area               | -0.20 [-0.6, 0.20]            | -0.04 [-0.32, 0.24]           | -0.27 [-0.57, 0.02]         | 0.10 [-0.06, 0.26]         | 0.03 [-0.25, 0.30]        | OFF < SIB   OFF < PAR                                   |
| Cortical thickness         | -0.29 [-0.71, 0.14]           | -0.52 [-1.39, 0.34]           | -0.07 [-0.49, 0.35]         | -0.11 [-0.22, 0.00]        | 0.01 [-0.39, 0.41]        | DZ < OFF   DZ < SIB   DZ < PAR                          |
| Cortical gray matter       | -0.32 [-0.62, -0.02]*         | -0.17 [-0.44, 0.11]           | -0.30 [-0.68, 0.08]         | 0.01 [-0.11, 0.13]         | 0.06 [-0.33, 0.45]        | MZ < SIB   MZ < PAR   OFF < SIB   OFF < PAR             |
| Cerebral white matter      | -0.22 [-0.53, 0.08]           | -0.12 [-0.40, 0.15]           | -0.27 [-0.54, -0.00]*       | -0.01 [-0.12, 0.09]        | -0.17 [-0.44, 0.11]       | OFF < SIB                                               |
| Cerebellum gray matter     | 0.03 [-0.27, 0.33]            | 0.06 [-0.31, 0.43]            | -0.17 [-0.37, 0.02]         | -0.10 [-0.20, 0.00]        | -0.15 [-0.40, 0.10]       |                                                         |
| Cerebellum white matter    | 0.10 [-0.20, 0.40]            | -0.07 [-0.35, 0.20]           | -0.16 [-0.35, 0.04]         | -0.06 [-0.17, 0.05]        | -0.34 [-0.61, -0.07]*     | MZ > PAR   SIB > PAR                                    |
| Third ventricle            | 0.29 [-0.01, 0.59]            | 0.18 [-0.09, 0.46]            | 0.10 [-0.10, 0.29]          | 0.16 [-0.03, 0.35]         | 0.01 [-0.34, 0.36]        |                                                         |
| Lateral ventricles         | 0.17 [-0.13, 0.47]            | 0.02 [-0.35, 0.40]            | 0.08 [-0.11, 0.28]          | 0.04 [-0.05, 0.13]         | 0.00 [-0.64, 0.63]        |                                                         |
| <i>Subcortical volumes</i> |                               |                               |                             |                            |                           |                                                         |
| Thalamus                   | -0.13 [-0.44, 0.18]           | -0.23 [-0.55, 0.09]           | -0.29 [-0.55, -0.04]*       | -0.05 [-0.14, 0.04]        | -0.24 [-0.50, 0.01]       | OFF < SIB                                               |
| Caudate                    | 0.12 [-0.18, 0.43]            | -0.13 [-0.42, 0.15]           | -0.21 [-0.41, -0.02]*       | 0.02 [-0.11, 0.16]         | 0.03 [-0.22, 0.28]        | OFF < MZ   OFF < SIB                                    |
| Putamen                    | 0.02 [-0.30, 0.33]            | -0.15 [-0.44, 0.14]           | -0.32 [-0.64, 0.01]         | -0.02 [-0.11, 0.07]        | -0.18 [-0.46, 0.10]       | OFF < SIB                                               |
| Pallidum                   | 0.15 [-0.17, 0.47]            | 0.01 [-0.28, 0.30]            | -0.35 [-0.63, -0.06]*       | -0.03 [-0.12, 0.06]        | 0.03 [-0.22, 0.28]        | OFF < MZ   OFF < DZ   OFF < SIB   OFF < PAR             |
| Hippocampus                | -0.14 [-0.46, 0.19]           | 0.03 [-0.26, 0.32]            | -0.25 [-0.51, -0.00]*       | -0.04 [-0.13, 0.05]        | -0.09 [-0.39, 0.21]       | OFF < SIB                                               |
| Amygdala                   | -0.20 [-0.62, 0.23]           | 0.01 [-0.28, 0.29]            | -0.27 [-0.51, -0.03]*       | 0.04 [-0.12, 0.20]         | 0.36 [0.03, 0.70]*        | MZ < PAR   DZ < PAR   OFF < SIB   OFF < PAR   SIB < PAR |
| Accumbens                  | -0.24 [-0.63, 0.15]           | 0.03 [-0.25, 0.30]            | -0.22 [-0.50, 0.07]         | -0.04 [-0.13, 0.05]        | 0.01 [-0.39, 0.42]        | OFF < SIB                                               |

\*  $p < 0.05$ , uncorrected | \*\*  $q < 0.05$ , corrected

**Table S8a.** Global and subcortical brain measures differences (Cohen's  $d$  effect sizes [ $\pm$  95% CI]) between controls and the different types of FDRs-BD, i.e. MZ co-twins, DZ co-twins, offspring, siblings, parents, controlling for intracranial volume (ICV). Last column displays whether the effect sizes differ significantly from each other, pairwise.

| BIPOLAR DISORDER<br><i>Corrected for ICV</i> | MZ co-twins<br>ES $\pm$ 95%CI | DZ co-twins<br>ES $\pm$ 95%CI | Offspring<br>ES $\pm$ 95%CI | Siblings†<br>ES $\pm$ 95%CI | Parents <sup>1</sup><br>ES $\pm$ 95%CI | Significant differences       |
|----------------------------------------------|-------------------------------|-------------------------------|-----------------------------|-----------------------------|----------------------------------------|-------------------------------|
| <i>Global measures</i>                       |                               |                               |                             |                             |                                        |                               |
| ICV                                          | -                             | -                             | -                           | -                           | -                                      |                               |
| Total brain                                  | -0.12 [-0.45, 0.21]           | -0.05 [-0.45, 0.35]           | -0.06 [-0.27, 0.16]         | 0.09 [-0.07, 0.25]          | -0.21 [-0.75, 0.32]                    |                               |
| Surface area                                 | -0.15 [-0.67, 0.36]           | -0.03 [-0.34, 0.27]           | 0.03 [-0.16, 0.21]          | 0.14 [-0.03, 0.32]          | 0.20 [-0.34, 0.73]                     |                               |
| Cortical thickness                           | 0.11 [-0.26, 0.48]            | -0.07 [-0.37, 0.24]           | -0.06 [-0.28, 0.17]         | -0.01 [-0.16, 0.14]         | 0.15 [-0.39, 0.68]                     |                               |
| Cortical gray matter                         | 0.07 [-0.26, 0.40]            | -0.08 [-0.38, 0.23]           | 0.02 [-0.17, 0.21]          | 0.13 [-0.04, 0.29]          | 0.29 [-0.24, 0.83]                     |                               |
| Cerebral white matter                        | -0.23 [-0.56, 0.10]           | 0.02 [-0.48, 0.51]            | -0.11 [-0.31, 0.08]         | 0.02 [-0.17, 0.20]          | -0.37 [-0.91, 0.17]                    |                               |
| Cerebellum gray matter†                      | 0.02 [-0.31, 0.35]            | 0.03 [-0.27, 0.34]            | 0.05 [-0.21, 0.31]          | 0.06 [-0.10, 0.23]          | -0.21 [-0.75, 0.32]                    |                               |
| Cerebellum white matter†                     | -0.11 [-0.50, 0.28]           | -0.17 [-0.78, 0.44]           | -0.13 [-0.44, 0.17]         | -0.03 [-0.20, 0.13]         | -0.14 [-0.67, 0.40]                    |                               |
| Third ventricle                              | 0.18 [-0.37, 0.73]            | -0.05 [-0.35, 0.26]           | -0.11 [-0.33, 0.10]         | -0.07 [-0.22, 0.08]         | 0.37 [-0.17, 0.91]                     |                               |
| Lateral ventricles                           | 0.32 [-0.13, 0.77]            | 0.06 [-0.25, 0.37]            | 0.11 [-0.07, 0.29]          | -0.06 [-0.21, 0.09]         | 0.80 [0.25, 1.35]*                     | MZ > SIB                      |
| <i>Subcortical volumes</i>                   |                               |                               |                             |                             |                                        |                               |
| Thalamus                                     | -0.52 [-1.19, 0.14]           | 0.12 [-0.53, 0.77]            | -0.04 [-0.17, 0.10]         | 0.00 [-0.17, 0.18]          | -0.52 [-1.06, 0.02]                    | MZ < DZ   MZ < OFF   MZ < SIB |
| Caudate                                      | 0.09 [-0.25, 0.43]            | 0.14 [-0.17, 0.45]            | -0.02 [-0.18, 0.13]         | 0.01 [-0.17, 0.18]          | -0.34 [-0.88, 0.19]                    |                               |
| Putamen                                      | -0.03 [-0.55, 0.49]           | 0.06 [-0.45, 0.58]            | -0.03 [-0.17, 0.11]         | -0.05 [-0.21, 0.11]         | -0.13 [-0.66, 0.41]                    |                               |
| Pallidum                                     | -0.06 [-0.46, 0.33]           | 0.02 [-0.40, 0.45]            | -0.02 [-0.16, 0.12]         | 0.07 [-0.08, 0.22]          | -0.81 [-1.36, -0.26]*                  |                               |
| Hippocampus                                  | -0.08 [-0.47, 0.32]           | -0.08 [-0.42, 0.26]           | -0.18 [-0.32, -0.04]*       | 0.15 [-0.00, 0.30]          | -0.54 [-1.08, -0.00]*                  | OFF < SIB                     |
| Amygdala                                     | 0.12 [-0.21, 0.45]            | 0.00 [-0.30, 0.31]            | -0.05 [-0.19, 0.08]         | 0.08 [-0.07, 0.23]          | -0.06 [-0.60, 0.47]                    |                               |
| Accumbens                                    | -0.27 [-0.76, 0.22]           | 0.07 [-0.24, 0.37]            | 0.03 [-0.16, 0.23]          | 0.08 [-0.12, 0.27]          | -0.10 [-0.63, 0.44]                    | MZ < SIB                      |

\*  $p < 0.05$ , uncorrected | \*\*  $q < 0.05$ , corrected | † excluded Olin in cerebellum analyses | <sup>1</sup> Parents only 1 cohort; no meta-analysis

**Table S8b.** Global and subcortical brain measures differences (Cohen's  $d$  effect sizes [ $\pm$  95% CI]) between controls and the different types of FDRs-SZ, i.e. MZ co-twins, DZ co-twins, offspring, siblings, parents, controlling for intracranial volume (ICV). Last column displays whether the effect sizes differ significantly from each other, pairwise.

| SCHIZOPHRENIA<br><i>Corrected for ICV</i> | MZ co-twins<br>ES $\pm$ 95%CI | DZ co-twins<br>ES $\pm$ 95%CI | Offspring<br>ES $\pm$ 95%CI | Siblings<br>ES $\pm$ 95%CI | Parents<br>ES $\pm$ 95%CI | Significant differences                     |
|-------------------------------------------|-------------------------------|-------------------------------|-----------------------------|----------------------------|---------------------------|---------------------------------------------|
| <i>Global measures</i>                    |                               |                               |                             |                            |                           |                                             |
| ICV                                       | -                             | -                             | -                           | -                          | -                         |                                             |
| Total brain                               | -0.30 [-0.83, 0.23]           | -0.21 [-0.59, 0.16]           | -0.23 [-0.51, 0.05]         | -0.13 [-0.22, -0.04]*      | -0.14 [-0.58, 0.31]       |                                             |
| Surface area                              | -0.19 [-0.72, 0.34]           | -0.05 [-0.33, 0.22]           | -0.18 [-0.50, 0.14]         | 0.02 [-0.09, 0.13]         | 0.07 [-0.18, 0.33]        | OFF < SIB   OFF < PAR                       |
| Cortical thickness                        | -0.28 [-0.71, 0.15]           | -0.51 [-1.43, 0.41]           | -0.08 [-0.50, 0.34]         | -0.12 [-0.24, 0.00]        | -0.01 [-0.39, 0.37]       | DZ < OFF   DZ < SIB   DZ < PAR              |
| Cortical gray matter                      | -0.32 [-0.66, 0.02]           | -0.50 [-1.45, 0.45]           | -0.24 [-0.63, 0.15]         | -0.06 [-0.15, 0.03]        | 0.07 [-0.28, 0.43]        | MZ < PAR   DZ < SIB   DZ < PAR   OFF < PAR  |
| Cerebral white matter                     | -0.21 [-0.70, 0.27]           | -0.17 [-0.44, 0.11]           | -0.12 [-0.31, 0.08]         | -0.10 [-0.19, -0.00]*      | -0.18 [-0.43, 0.07]       |                                             |
| Cerebellum gray matter                    | 0.10 [-0.21, 0.41]            | 0.06 [-0.29, 0.40]            | -0.10 [-0.29, 0.10]         | -0.12 [-0.21, -0.03]*      | -0.12 [-0.37, 0.13]       |                                             |
| Cerebellum white matter                   | 0.21 [-0.15, 0.58]            | -0.09 [-0.37, 0.18]           | -0.12 [-0.32, 0.07]         | -0.08 [-0.18, 0.01]        | -0.34 [-0.60, -0.07]*     | MZ > OFF   MZ > SIB   MZ > PAR   SIB > PAR  |
| Third ventricle                           | 0.34 [0.04, 0.64]*            | 0.21 [-0.06, 0.49]            | 0.21 [-0.08, 0.51]          | 0.13 [-0.04, 0.30]         | 0.02 [-0.32, 0.37]        |                                             |
| Lateral ventricles                        | 0.24 [-0.07, 0.55]            | 0.09 [-0.26, 0.43]            | 0.20 [-0.09, 0.49]          | 0.03 [-0.06, 0.12]         | -0.02 [-0.70, 0.65]       |                                             |
| <i>Subcortical volumes</i>                |                               |                               |                             |                            |                           |                                             |
| Thalamus                                  | -0.12 [-0.43, 0.19]           | -0.28 [-0.77, 0.21]           | -0.16 [-0.52, 0.21]         | -0.09 [-0.23, 0.04]        | -0.23 [-0.48, 0.02]       |                                             |
| Caudate                                   | 0.26 [-0.04, 0.56]            | -0.16 [-0.44, 0.13]           | -0.14 [-0.33, 0.05]         | -0.04 [-0.13, 0.05]        | 0.07 [-0.18, 0.32]        | MZ > DZ   MZ > OFF   MZ > SIB               |
| Putamen                                   | 0.07 [-0.25, 0.38]            | -0.32 [-0.94, 0.29]           | -0.18 [-0.38, 0.01]         | -0.03 [-0.12, 0.06]        | -0.17 [-0.46, 0.12]       | DZ < SIB                                    |
| Pallidum                                  | 0.20 [-0.12, 0.51]            | -0.10 [-0.59, 0.40]           | -0.24 [-0.43, -0.04]*       | -0.05 [-0.14, 0.04]        | 0.07 [-0.18, 0.32]        | OFF < MZ   OFF < SIB   OFF < PAR            |
| Hippocampus                               | -0.08 [-0.38, 0.23]           | 0.04 [-0.25, 0.32]            | -0.16 [-0.35, 0.04]         | -0.05 [-0.15, 0.06]        | -0.07 [-0.32, 0.19]       |                                             |
| Amygdala                                  | -0.15 [-0.58, 0.29]           | -0.01 [-0.39, 0.37]           | -0.17 [-0.37, 0.02]         | -0.01 [-0.17, 0.14]        | 0.41 [0.15, 0.67]**       | MZ < PAR   DZ < PAR   OFF < PAR   SIB < PAR |
| Accumbens                                 | -0.20 [-0.60, 0.21]           | -0.20 [-0.98, 0.58]           | -0.14 [-0.40, 0.12]         | -0.04 [-0.13, 0.05]        | 0.00 [-0.35, 0.36]        |                                             |

\*  $p < 0.05$ , uncorrected | \*\*  $q < 0.05$ , corrected

**Table S9a.** Global and subcortical brain measures differences (Cohen's *d* effect sizes [ $\pm$  95% CI]) between controls and the different types of FDRs-BD, i.e. MZ co-twins, DZ co-twins, offspring, siblings and parents, controlling for psychopathology in relatives and/or controls by adding the presence of a diagnosis as a covariate.

| BIPOLAR DISORDER<br><i>Corrected for psychopathology</i> | MZ co-twins<br>ES $\pm$ 95%CI | DZ co-twins<br>ES $\pm$ 95%CI | Offspring<br>ES $\pm$ 95%CI | Siblings†<br>ES $\pm$ 95%CI | Parents <sup>1</sup><br>ES $\pm$ 95%CI |
|----------------------------------------------------------|-------------------------------|-------------------------------|-----------------------------|-----------------------------|----------------------------------------|
| <i>Global measures</i>                                   |                               |                               |                             |                             |                                        |
| ICV                                                      | 0.25 [-0.08, 0.58]            | 0.16 [-0.15, 0.47]            | 0.22 [0.04, 0.40]*          | 0.10 [-0.05, 0.26]          | 0.10 [-0.44, 0.63]                     |
| Total brain                                              | 0.06 [-0.27, 0.39]            | 0.03 [-0.27, 0.34]            | 0.15 [-0.06, 0.36]          | 0.15 [-0.04, 0.33]          | -0.07 [-0.61, 0.46]                    |
| Surface area                                             | 0.05 [-0.28, 0.38]            | 0.04 [-0.27, 0.34]            | 0.20 [-0.03, 0.43]          | 0.19 [-0.02, 0.40]          | 0.22 [-0.31, 0.76]                     |
| Cortical thickness                                       | 0.07 [-0.35, 0.48]            | -0.02 [-0.33, 0.29]           | -0.05 [-0.26, 0.16]         | 0.01 [-0.14, 0.15]          | 0.13 [-0.41, 0.66]                     |
| Cortical gray matter                                     | 0.17 [-0.16, 0.50]            | 0.02 [-0.29, 0.32]            | 0.19 [-0.02, 0.40]          | 0.18 [-0.02, 0.37]          | 0.30 [-0.23, 0.84]                     |
| Cerebral white matter                                    | -0.01 [-0.34, 0.32]           | 0.04 [-0.27, 0.35]            | 0.10 [-0.10, 0.30]          | 0.09 [-0.10, 0.28]          | -0.22 [-0.75, 0.32]                    |
| Cerebellum gray matter†                                  | 0.08 [-0.25, 0.41]            | 0.06 [-0.25, 0.37]            | 0.13 [-0.17, 0.44]          | 0.17 [0.00, 0.33]*          | -0.18 [-0.71, 0.36]                    |
| Cerebellum white matter†                                 | -0.02 [-0.39, 0.34]           | -0.11 [-0.66, 0.45]           | -0.03 [-0.30, 0.25]         | 0.05 [-0.11, 0.22]          | -0.10 [-0.63, 0.44]                    |
| Third ventricle                                          | 0.18 [-0.34, 0.70]            | 0.09 [-0.22, 0.40]            | -0.05 [-0.26, 0.16]         | -0.07 [-0.22, 0.08]         | 0.38 [-0.16, 0.92]                     |
| Lateral ventricles                                       | 0.28 [-0.24, 0.80]            | 0.19 [-0.12, 0.50]            | 0.18 [0.05, 0.32]*          | -0.02 [-0.17, 0.13]         | 0.76 [0.21, 1.30]*                     |
| <i>Subcortical volumes</i>                               |                               |                               |                             |                             |                                        |
| Thalamus                                                 | -0.14 [-0.51, 0.24]           | 0.00 [-0.31, 0.31]            | 0.08 [-0.09, 0.24]          | 0.04 [-0.11, 0.19]          | -0.47 [-1.01, 0.07]                    |
| Caudate                                                  | 0.21 [-0.13, 0.55]            | 0.19 [-0.12, 0.5]             | 0.12 [-0.02, 0.25]          | 0.04 [-0.10, 0.19]          | -0.30 [-0.84, 0.23]                    |
| Putamen                                                  | 0.08 [-0.26, 0.41]            | 0.11 [-0.40, 0.62]            | 0.06 [-0.10, 0.23]          | -0.04 [-0.22, 0.15]         | -0.08 [-0.61, 0.46]                    |
| Pallidum                                                 | 0.08 [-0.25, 0.42]            | 0.04 [-0.28, 0.37]            | 0.09 [-0.10, 0.27]          | 0.08 [-0.07, 0.23]          | -0.75 [-1.30, -0.20]*                  |
| Hippocampus                                              | -0.05 [-0.38, 0.28]           | -0.08 [-0.39, 0.23]           | -0.04 [-0.17, 0.10]         | 0.15 [-0.02, 0.32]          | -0.46 [-1.00, 0.08]                    |
| Amygdala                                                 | 0.14 [-0.19, 0.47]            | 0.04 [-0.27, 0.34]            | 0.06 [-0.08, 0.19]          | 0.10 [-0.04, 0.25]          | -0.01 [-0.54, 0.52]                    |
| Accumbens                                                | -0.15 [-0.51, 0.21]           | 0.07 [-0.23, 0.38]            | 0.13 [-0.06, 0.32]          | 0.10 [-0.09, 0.29]          | -0.09 [-0.62, 0.45]                    |

\*  $p < 0.05$ , uncorrected | \*\*  $q < 0.05$ , corrected | † excluded Olin in cerebellum analyses | <sup>1</sup> Parents only 1 cohort; no meta-analysis

**Table S9b.** Global and subcortical brain measures differences (Cohen's  $d$  effect sizes [ $\pm$  95% CI]) between controls and the different types of FDRs-SZ, i.e. MZ co-twins, DZ co-twins, offspring, siblings and parents, controlling for psychopathology in relatives and/or controls by adding the presence of a diagnosis as a covariate.

| SCHIZOPHRENIA<br><i>Corrected for psychopathology</i> | MZ co-twins<br>ES $\pm$ 95%CI | DZ co-twins<br>ES $\pm$ 95%CI | Offspring<br>ES $\pm$ 95%CI | Siblings<br>ES $\pm$ 95%CI | Parents<br>ES $\pm$ 95%CI |
|-------------------------------------------------------|-------------------------------|-------------------------------|-----------------------------|----------------------------|---------------------------|
| <i>Global measures</i>                                |                               |                               |                             |                            |                           |
| ICV                                                   | -0.09 [-0.39, 0.21]           | -0.01 [-0.29, 0.27]           | -0.16 [-0.45, 0.12]         | 0.09 [-0.08, 0.26]         | -0.04 [-0.30, 0.22]       |
| Total brain                                           | -0.18 [-0.48, 0.12]           | -0.13 [-0.40, 0.15]           | -0.29 [-0.59, 0.01]         | 0.01 [-0.12, 0.13]         | -0.09 [-0.44, 0.25]       |
| Surface area                                          | -0.15 [-0.59, 0.30]           | -0.02 [-0.30, 0.25]           | -0.22 [-0.47, 0.03]         | 0.11 [-0.05, 0.27]         | 0.04 [-0.21, 0.29]        |
| Cortical thickness                                    | -0.24 [-0.66, 0.18]           | -0.50 [-1.28, 0.29]           | -0.07 [-0.49, 0.35]         | -0.10 [-0.21, 0.01]        | 0.01 [-0.41, 0.43]        |
| Cortical gray matter                                  | -0.27 [-0.57, 0.03]           | -0.17 [-0.45, 0.10]           | -0.26 [-0.60, 0.09]         | 0.03 [-0.10, 0.15]         | 0.06 [-0.32, 0.45]        |
| Cerebral white matter                                 | -0.17 [-0.48, 0.15]           | -0.10 [-0.37, 0.18]           | -0.23 [-0.46, -0.00]*       | 0.00 [-0.11, 0.11]         | -0.15 [-0.40, 0.10]       |
| Cerebellum gray matter                                | 0.15 [-0.15, 0.45]            | 0.08 [-0.27, 0.43]            | -0.17 [-0.36, 0.03]         | -0.09 [-0.19, 0.00]        | -0.17 [-0.46, 0.11]       |
| Cerebellum white matter                               | 0.13 [-0.17, 0.43]            | -0.09 [-0.36, 0.19]           | -0.15 [-0.34, 0.05]         | -0.06 [-0.17, 0.04]        | -0.35 [-0.63, -0.08]*     |
| Third ventricle                                       | 0.36 [0.06, 0.67]*            | 0.27 [-0.01, 0.54]            | 0.12 [-0.07, 0.32]          | 0.15 [-0.05, 0.36]         | -0.02 [-0.41, 0.37]       |
| Lateral ventricles                                    | 0.19 [-0.13, 0.52]            | 0.04 [-0.33, 0.41]            | 0.08 [-0.11, 0.27]          | 0.06 [-0.06, 0.17]         | 0.01 [-0.62, 0.64]        |
| <i>Subcortical volumes</i>                            |                               |                               |                             |                            |                           |
| Thalamus                                              | -0.10 [-0.41, 0.21]           | -0.23 [-0.51, 0.05]           | -0.28 [-0.54, -0.01]*       | -0.04 [-0.13, 0.05]        | -0.25 [-0.50, 0.00]       |
| Caudate                                               | 0.15 [-0.15, 0.46]            | -0.12 [-0.40, 0.16]           | -0.19 [-0.38, 0.01]         | 0.04 [-0.10, 0.18]         | 0.04 [-0.21, 0.29]        |
| Putamen                                               | 0.05 [-0.27, 0.36]            | -0.14 [-0.45, 0.16]           | -0.27 [-0.53, -0.00]*       | -0.01 [-0.10, 0.08]        | -0.17 [-0.45, 0.11]       |
| Pallidum                                              | 0.19 [-0.13, 0.51]            | 0.05 [-0.24, 0.34]            | -0.34 [-0.62, -0.06]*       | -0.02 [-0.12, 0.07]        | 0.03 [-0.22, 0.28]        |
| Hippocampus                                           | -0.13 [-0.43, 0.18]           | 0.00 [-0.29, 0.28]            | -0.21 [-0.40, -0.01]*       | -0.04 [-0.13, 0.06]        | -0.09 [-0.38, 0.21]       |
| Amygdala                                              | -0.22 [-0.69, 0.26]           | -0.02 [-0.30, 0.26]           | -0.20 [-0.39, -0.00]*       | 0.04 [-0.11, 0.20]         | 0.36 [0.04, 0.68]*        |
| Accumbens                                             | -0.31 [-0.75, 0.13]           | 0.01 [-0.27, 0.29]            | -0.20 [-0.46, 0.06]         | -0.02 [-0.13, 0.10]        | 0.02 [-0.39, 0.42]        |

\*  $p < 0.05$ , uncorrected | \*\*  $q < 0.05$ , corrected

**Table S10a.** Global and subcortical brain measures differences (Cohen's *d* effect sizes [ $\pm$  95% CI]) between controls and the different types of FDRs-BD, i.e. MZ co-twins, DZ co-twins, offspring, siblings and parents, controlling for intracranial volume (ICV) and psychopathology in relatives and/or controls by adding the presence of a diagnosis as a covariate.

| BIPOLAR DISORDER<br><i>Corrected for psychopathology<br/>and ICV</i> | MZ co-twins<br>ES $\pm$ 95%CI | DZ co-twins<br>ES $\pm$ 95%CI | Offspring<br>ES $\pm$ 95%CI | Siblings†<br>ES $\pm$ 95%CI | Parents <sup>1</sup><br>ES $\pm$ 95%CI |
|----------------------------------------------------------------------|-------------------------------|-------------------------------|-----------------------------|-----------------------------|----------------------------------------|
| <i>Global measures</i>                                               |                               |                               |                             |                             |                                        |
| ICV                                                                  | -                             | -                             | -                           | -                           | -                                      |
| Total brain                                                          | -0.19 [-0.52, 0.15]           | -0.08 [-0.53, 0.37]           | -0.01 [-0.25, 0.22]         | 0.12 [-0.05, 0.29]          | -0.21 [-0.75, 0.32]                    |
| Surface area                                                         | -0.20 [-0.74, 0.34]           | -0.09 [-0.39, 0.22]           | 0.08 [-0.13, 0.28]          | 0.15 [-0.02, 0.33]          | 0.20 [-0.34, 0.73]                     |
| Cortical thickness                                                   | 0.06 [-0.34, 0.45]            | -0.05 [-0.36, 0.25]           | -0.05 [-0.24, 0.14]         | 0.02 [-0.13, 0.17]          | 0.15 [-0.39, 0.68]                     |
| Cortical gray matter                                                 | 0.00 [-0.33, 0.33]            | -0.11 [-0.42, 0.19]           | 0.07 [-0.12, 0.25]          | 0.14 [-0.01, 0.29]          | 0.29 [-0.24, 0.83]                     |
| Cerebral white matter                                                | -0.26 [-0.59, 0.07]           | 0.00 [-0.52, 0.52]            | -0.10 [-0.32, 0.12]         | 0.03 [-0.17, 0.23]          | -0.37 [-0.91, 0.17]                    |
| Cerebellum gray matter†                                              | -0.02 [-0.35, 0.31]           | 0.01 [-0.30, 0.31]            | 0.07 [-0.23, 0.37]          | 0.11 [-0.05, 0.28]          | -0.21 [-0.75, 0.32]                    |
| Cerebellum white matter†                                             | -0.16 [-0.52, 0.21]           | -0.18 [-0.81, 0.45]           | -0.13 [-0.42, 0.16]         | -0.03 [-0.19, 0.14]         | -0.14 [-0.67, 0.40]                    |
| Third ventricle                                                      | 0.16 [-0.31, 0.63]            | 0.00 [-0.31, 0.30]            | -0.11 [-0.32, 0.10]         | -0.09 [-0.24, 0.06]         | 0.37 [-0.17, 0.91]                     |
| Lateral ventricles                                                   | 0.31 [-0.06, 0.68]            | 0.09 [-0.21, 0.40]            | 0.09 [-0.09, 0.27]          | -0.07 [-0.24, 0.09]         | 0.80 [0.25, 1.35]*                     |
| <i>Subcortical volumes</i>                                           |                               |                               |                             |                             |                                        |
| Thalamus                                                             | -0.48 [-1.09, 0.13]           | 0.05 [-0.45, 0.56]            | -0.04 [-0.18, 0.09]         | 0.02 [-0.15, 0.18]          | -0.52 [-1.06, 0.02]                    |
| Caudate                                                              | 0.11 [-0.23, 0.45]            | 0.16 [-0.15, 0.47]            | -0.01 [-0.17, 0.15]         | 0.02 [-0.13, 0.16]          | -0.34 [-0.88, 0.19]                    |
| Putamen                                                              | -0.04 [-0.57, 0.49]           | 0.07 [-0.47, 0.60]            | -0.02 [-0.16, 0.12]         | -0.04 [-0.22, 0.13]         | -0.13 [-0.66, 0.41]                    |
| Pallidum                                                             | -0.02 [-0.40, 0.35]           | 0.01 [-0.39, 0.41]            | -0.01 [-0.16, 0.15]         | 0.07 [-0.10, 0.23]          | -0.81 [-1.36, -0.26]*                  |
| Hippocampus                                                          | -0.18 [-0.67, 0.31]           | -0.16 [-0.57, 0.25]           | -0.20 [-0.34, -0.06]        | 0.16 [-0.01, 0.33]          | -0.54 [-1.08, -0.00]*                  |
| Amygdala                                                             | 0.05 [-0.28, 0.38]            | -0.02 [-0.33, 0.29]           | -0.05 [-0.19, 0.08]         | 0.10 [-0.07, 0.26]          | -0.06 [-0.60, 0.47]                    |
| Accumbens                                                            | -0.24 [-0.70, 0.22]           | 0.06 [-0.25, 0.37]            | 0.05 [-0.13, 0.22]          | 0.07 [-0.11, 0.25]          | -0.10 [-0.63, 0.44]                    |

\*  $p < 0.05$ , uncorrected | \*\*  $q < 0.05$ , corrected | † excluded Olin in cerebellum analyses | <sup>1</sup> Parents only 1 cohort; no meta-analysis

**Table S10b.** Global and subcortical brain measures differences (Cohen's *d* effect sizes [ $\pm$  95% CI]) between controls and the different types of FDRs-SZ, i.e. MZ co-twins, DZ co-twins, offspring, siblings and parents, controlling for intracranial volume (ICV) and psychopathology in relatives and/or controls by adding the presence of a diagnosis as a covariate.

| SCHIZOPHRENIA<br><i>Corrected for psychopathology<br/>and ICV</i> | MZ co-twins<br>ES $\pm$ 95%CI | DZ co-twins<br>ES $\pm$ 95%CI | Offspring<br>ES $\pm$ 95%CI | Siblings<br>ES $\pm$ 95%CI | Parents<br>ES $\pm$ 95%CI |
|-------------------------------------------------------------------|-------------------------------|-------------------------------|-----------------------------|----------------------------|---------------------------|
| <i>Global measures</i>                                            |                               |                               |                             |                            |                           |
| ICV                                                               | -                             | -                             | -                           | -                          | -                         |
| Total brain                                                       | -0.23 [-0.67, 0.20]           | -0.20 [-0.48, 0.07]           | -0.22 [-0.49, 0.05]         | -0.09 [-0.18, 0.00]        | -0.12 [-0.54, 0.30]       |
| Surface area                                                      | -0.16 [-0.68, 0.36]           | -0.09 [-0.36, 0.19]           | -0.16 [-0.47, 0.15]         | 0.04 [-0.08, 0.16]         | 0.11 [-0.14, 0.37]        |
| Cortical thickness                                                | -0.22 [-0.65, 0.21]           | -0.47 [-1.33, 0.39]           | -0.12 [-0.51, 0.26]         | -0.10 [-0.22, 0.02]        | -0.01 [-0.42, 0.39]       |
| Cortical gray matter                                              | -0.26 [-0.56, 0.04]           | -0.49 [-1.37, 0.38]           | -0.21 [-0.58, 0.16]         | -0.03 [-0.12, 0.06]        | 0.07 [-0.28, 0.43]        |
| Cerebral white matter                                             | -0.16 [-0.58, 0.26]           | -0.17 [-0.45, 0.10]           | -0.12 [-0.31, 0.08]         | -0.07 [-0.16, 0.02]        | -0.14 [-0.39, 0.11]       |
| Cerebellum gray matter                                            | 0.21 [-0.09, 0.51]            | 0.07 [-0.25, 0.39]            | -0.11 [-0.30, 0.09]         | -0.12 [-0.21, -0.02]*      | -0.16 [-0.44, 0.12]       |
| Cerebellum white matter                                           | 0.21 [-0.09, 0.51]            | -0.13 [-0.40, 0.15]           | -0.12 [-0.31, 0.08]         | -0.08 [-0.17, 0.01]        | -0.35 [-0.63, -0.08]*     |
| Third ventricle                                                   | 0.42 [0.12, 0.72]*            | 0.30 [0.03, 0.58]*            | 0.23 [-0.07, 0.52]          | 0.12 [-0.06, 0.30]         | -0.01 [-0.40, 0.38]       |
| Lateral ventricles                                                | 0.25 [-0.09, 0.60]            | 0.10 [-0.24, 0.44]            | 0.16 [-0.06, 0.39]          | 0.04 [-0.05, 0.13]         | -0.01 [-0.68, 0.66]       |
| <i>Subcortical volumes</i>                                        |                               |                               |                             |                            |                           |
| Thalamus                                                          | -0.09 [-0.40, 0.22]           | -0.25 [-0.56, 0.07]           | -0.17 [-0.53, 0.20]         | -0.09 [-0.24, 0.06]        | -0.24 [-0.49, 0.01]       |
| Caudate                                                           | 0.28 [-0.03, 0.58]            | -0.15 [-0.43, 0.13]           | -0.13 [-0.32, 0.07]         | -0.02 [-0.11, 0.07]        | 0.07 [-0.18, 0.32]        |
| Putamen                                                           | 0.08 [-0.23, 0.40]            | -0.33 [-0.97, 0.30]           | -0.17 [-0.37, 0.02]         | -0.02 [-0.11, 0.07]        | -0.16 [-0.45, 0.13]       |
| Pallidum                                                          | 0.23 [-0.09, 0.55]            | -0.08 [-0.59, 0.44]           | -0.25 [-0.45, -0.06]*       | -0.04 [-0.13, 0.05]        | 0.06 [-0.19, 0.31]        |
| Hippocampus                                                       | -0.08 [-0.38, 0.23]           | -0.01 [-0.30, 0.28]           | -0.14 [-0.33, 0.06]         | -0.04 [-0.15, 0.07]        | -0.06 [-0.31, 0.19]       |
| Amygdala                                                          | -0.17 [-0.63, 0.29]           | -0.02 [-0.30, 0.26]           | -0.14 [-0.33, 0.05]         | 0.00 [-0.16, 0.15]         | 0.43 [0.16, 0.70]**       |
| Accumbens                                                         | -0.27 [-0.70, 0.16]           | -0.22 [-0.99, 0.55]           | -0.14 [-0.38, 0.10]         | -0.01 [-0.11, 0.09]        | 0.00 [-0.37, 0.37]        |

\*  $p < 0.05$ , uncorrected | \*\*  $q < 0.05$ , corrected



**Table S11a.** Global and subcortical brain measures differences (Cohen's *d* effect sizes [ $\pm$  95% CI]) between *healthy* controls and the different types of *healthy* FDRs-BD, i.e. MZ co-twins, DZ co-twins, offspring, siblings and parents.

| BIPOLAR DISORDER<br><i>Healthy only</i> | MZ co-twins<br>ES $\pm$ 95%CI | DZ co-twins<br>ES $\pm$ 95%CI | Offspring<br>ES $\pm$ 95%CI | Siblings†<br>ES $\pm$ 95%CI | Parents <sup>1</sup><br>ES $\pm$ 95%CI |
|-----------------------------------------|-------------------------------|-------------------------------|-----------------------------|-----------------------------|----------------------------------------|
| <i>Global measures</i>                  |                               |                               |                             |                             |                                        |
| ICV                                     | 0.26 [-0.16, 0.68]            | 0.23 [-0.11, 0.58]            | 0.18 [-0.00, 0.37]          | 0.08 [-0.08, 0.25]          | 0.10 [-0.44, 0.63]                     |
| Total brain                             | 0.11 [-0.30, 0.52]            | 0.09 [-0.26, 0.44]            | 0.13 [-0.07, 0.34]          | 0.17 [-0.04, 0.39]          | -0.07 [-0.61, 0.46]                    |
| Surface area                            | 0.17 [-0.25, 0.58]            | 0.09 [-0.26, 0.43]            | 0.19 [-0.03, 0.42]          | 0.21 [-0.02, 0.45]          | 0.22 [-0.31, 0.76]                     |
| Cortical thickness                      | 0.00 [-0.57, 0.57]            | -0.01 [-0.35, 0.34]           | -0.06 [-0.29, 0.18]         | -0.03 [-0.20, 0.13]         | 0.13 [-0.41, 0.66]                     |
| Cortical gray matter                    | 0.21 [-0.20, 0.62]            | 0.08 [-0.27, 0.42]            | 0.21 [0.03, 0.39]           | 0.18 [-0.05, 0.40]          | 0.30 [-0.23, 0.84]                     |
| Cerebral white matter                   | 0.04 [-0.37, 0.45]            | 0.10 [-0.24, 0.45]            | 0.07 [-0.13, 0.26]          | 0.13 [-0.09, 0.35]          | -0.22 [-0.75, 0.32]                    |
| Cerebellum gray matter†                 | 0.10 [-0.31, 0.51]            | 0.05 [-0.30, 0.39]            | 0.08 [-0.23, 0.40]          | 0.22 [0.02, 0.41]*          | -0.18 [-0.71, 0.36]                    |
| Cerebellum white matter†                | 0.00 [-0.42, 0.41]            | -0.13 [-0.62, 0.37]           | -0.04 [-0.34, 0.26]         | 0.08 [-0.10, 0.26]          | -0.10 [-0.63, 0.44]                    |
| Third ventricle                         | 0.04 [-0.41, 0.49]            | 0.12 [-0.23, 0.46]            | -0.03 [-0.36, 0.29]         | -0.07 [-0.24, 0.11]         | 0.38 [-0.16, 0.92]                     |
| Lateral ventricles                      | 0.14 [-0.50, 0.78]            | 0.12 [-0.23, 0.46]            | 0.16 [-0.00, 0.31]          | 0.00 [-0.16, 0.16]          | 0.76 [0.21, 1.30]*                     |
| <i>Subcortical volumes</i>              |                               |                               |                             |                             |                                        |
| Thalamus                                | -0.02 [-0.45, 0.40]           | 0.00 [-0.35, 0.35]            | 0.04 [-0.17, 0.24]          | 0.07 [-0.09, 0.23]          | -0.47 [-1.01, 0.07]                    |
| Caudate                                 | 0.22 [-0.20, 0.63]            | 0.20 [-0.15, 0.55]            | 0.07 [-0.09, 0.24]          | -0.02 [-0.18, 0.15]         | -0.30 [-0.84, 0.23]                    |
| Putamen                                 | 0.17 [-0.25, 0.59]            | 0.13 [-0.33, 0.59]            | 0.04 [-0.12, 0.20]          | -0.09 [-0.28, 0.11]         | -0.08 [-0.61, 0.46]                    |
| Pallidum                                | 0.13 [-0.32, 0.58]            | 0.19 [-0.24, 0.61]            | 0.09 [-0.11, 0.28]          | 0.07 [-0.09, 0.24]          | -0.75 [-1.30, -0.20]*                  |
| Hippocampus                             | 0.04 [-0.38, 0.45]            | -0.02 [-0.36, 0.33]           | -0.05 [-0.21, 0.11]         | 0.17 [-0.02, 0.36]          | -0.46 [-1.00, 0.08]                    |
| Amygdala                                | 0.16 [-0.26, 0.57]            | 0.15 [-0.28, 0.57]            | 0.03 [-0.13, 0.19]          | 0.16 [-0.02, 0.35]          | -0.01 [-0.54, 0.52]                    |
| Accumbens                               | -0.21 [-0.82, 0.39]           | 0.02 [-0.32, 0.37]            | 0.17 [-0.05, 0.39]          | 0.09 [-0.13, 0.32]          | -0.09 [-0.62, 0.45]                    |

\*  $p < 0.05$ , uncorrected | \*\*  $q < 0.05$ , corrected | † excluded Olin in cerebellum analyses | <sup>1</sup> Parents only 1 cohort; no meta-analysis

**Table S11b.** Global and subcortical brain measures differences (Cohen's *d* effect sizes [ $\pm$  95% CI]) between *healthy* controls and the different types of *healthy* FDRs-SZ, i.e. MZ co-twins, DZ co-twins, offspring, siblings and parents.

| SCHIZOPHRENIA<br><i>Healthy only</i> | MZ co-twins<br>ES $\pm$ 95%CI | DZ co-twins<br>ES $\pm$ 95%CI | Offspring<br>ES $\pm$ 95%CI | Siblings<br>ES $\pm$ 95%CI | Parents<br>ES $\pm$ 95%CI |
|--------------------------------------|-------------------------------|-------------------------------|-----------------------------|----------------------------|---------------------------|
| <i>Global measures</i>               |                               |                               |                             |                            |                           |
| ICV                                  | -0.05 [-0.42, 0.32]           | 0.04 [-0.25, 0.34]            | -0.32 [-0.77, 0.14]         | 0.09 [-0.08, 0.27]         | -0.05 [-0.31, 0.21]       |
| Total brain                          | -0.15 [-0.52, 0.22]           | -0.05 [-0.35, 0.24]           | -0.45 [-0.92, 0.02]         | 0.02 [-0.12, 0.16]         | -0.09 [-0.43, 0.25]       |
| Surface area                         | -0.19 [-0.56, 0.18]           | 0.00 [-0.29, 0.30]            | -0.33 [-0.72, 0.06]         | 0.13 [-0.06, 0.31]         | 0.07 [-0.20, 0.33]        |
| Cortical thickness                   | -0.08 [-0.66, 0.50]           | -0.43 [-1.22, 0.36]           | -0.12 [-0.47, 0.23]         | -0.11 [-0.26, 0.03]        | -0.14 [-0.40, 0.12]       |
| Cortical gray matter                 | -0.22 [-0.59, 0.15]           | -0.13 [-0.42, 0.17]           | -0.36 [-0.85, 0.12]         | 0.03 [-0.10, 0.16]         | 0.05 [-0.32, 0.42]        |
| Cerebral white matter                | -0.14 [-0.51, 0.23]           | -0.05 [-0.35, 0.24]           | -0.41 [-0.81, -0.00]*       | 0.02 [-0.11, 0.15]         | -0.13 [-0.39, 0.13]       |
| Cerebellum gray matter               | 0.14 [-0.23, 0.51]            | 0.26 [-0.04, 0.55]            | -0.15 [-0.37, 0.06]         | -0.08 [-0.19, 0.03]        | -0.20 [-0.48, 0.07]       |
| Cerebellum white matter              | 0.16 [-0.21, 0.53]            | 0.08 [-0.22, 0.37]            | -0.16 [-0.38, 0.05]         | -0.07 [-0.18, 0.04]        | -0.29 [-0.56, -0.03]*     |
| Third ventricle                      | 0.44 [0.07, 0.81]*            | 0.29 [-0.00, 0.59]            | 0.09 [-0.12, 0.31]          | 0.16 [-0.05, 0.36]         | 0.02 [-0.33, 0.38]        |
| Lateral ventricles                   | 0.23 [-0.29, 0.74]            | -0.02 [-0.55, 0.51]           | 0.02 [-0.20, 0.23]          | 0.07 [-0.05, 0.19]         | 0.00 [-0.66, 0.66]        |
| <i>Subcortical volumes</i>           |                               |                               |                             |                            |                           |
| Thalamus                             | -0.04 [-0.41, 0.34]           | -0.24 [-0.55, 0.07]           | -0.38 [-0.70, -0.05]*       | -0.03 [-0.13, 0.07]        | -0.27 [-0.53, -0.01]*     |
| Caudate                              | 0.15 [-0.22, 0.52]            | -0.13 [-0.43, 0.17]           | -0.28 [-0.54, -0.03]*       | 0.02 [-0.12, 0.16]         | 0.02 [-0.24, 0.28]        |
| Putamen                              | 0.08 [-0.31, 0.46]            | -0.07 [-0.38, 0.24]           | -0.49 [-0.95, -0.03]*       | -0.01 [-0.11, 0.09]        | -0.16 [-0.47, 0.14]       |
| Pallidum                             | 0.25 [-0.14, 0.64]            | 0.03 [-0.28, 0.33]            | -0.46 [-0.83, -0.08]*       | -0.01 [-0.13, 0.11]        | 0.03 [-0.23, 0.30]        |
| Hippocampus                          | -0.19 [-0.57, 0.18]           | -0.08 [-0.38, 0.23]           | -0.28 [-0.57, 0.02]         | -0.04 [-0.14, 0.06]        | -0.10 [-0.39, 0.18]       |
| Amygdala                             | -0.26 [-0.77, 0.26]           | -0.01 [-0.31, 0.29]           | -0.26 [-0.53, 0.01]         | 0.02 [-0.14, 0.18]         | 0.40 [0.04, 0.75]*        |
| Accumbens                            | -0.20 [-0.64, 0.23]           | 0.01 [-0.29, 0.31]            | -0.26 [-0.48, -0.03]*       | -0.03 [-0.15, 0.10]        | -0.03 [-0.39, 0.32]       |

\*  $p < 0.05$ , uncorrected | \*\*  $q < 0.05$ , corrected

**Table S12a.** Global and subcortical brain measures differences (Cohen's *d* effect sizes [ $\pm$  95% CI]) between *healthy* controls and the different types of *healthy* FDRs-BD, i.e. MZ co-twins, DZ co-twins, offspring, siblings and parents, controlling for intracranial volume (ICV).

| BIPOLAR DISORDER<br><i>Healthy only - corrected for ICV</i> | MZ co-twins<br>ES $\pm$ 95%CI | DZ co-twins<br>ES $\pm$ 95%CI | Offspring<br>ES $\pm$ 95%CI | Siblings†<br>ES $\pm$ 95%CI | Parents <sup>1</sup><br>ES $\pm$ 95%CI |
|-------------------------------------------------------------|-------------------------------|-------------------------------|-----------------------------|-----------------------------|----------------------------------------|
| <i>Global measures</i>                                      |                               |                               |                             |                             |                                        |
| ICV                                                         | -                             | -                             | -                           | -                           | -                                      |
| Total brain                                                 | -0.01 [-0.42, 0.40]           | -0.14 [-0.48, 0.21]           | 0.01 [-0.20, 0.21]          | 0.16 [-0.03, 0.34]          | -0.21 [-0.75, 0.32]                    |
| Surface area                                                | 0.00 [-0.54, 0.54]            | -0.11 [-0.46, 0.23]           | 0.10 [-0.08, 0.29]          | 0.18 [-0.01, 0.37]          | 0.20 [-0.34, 0.73]                     |
| Cortical thickness                                          | 0.02 [-0.51, 0.54]            | -0.02 [-0.36, 0.33]           | -0.04 [-0.26, 0.18]         | -0.02 [-0.18, 0.14]         | 0.15 [-0.39, 0.68]                     |
| Cortical gray matter                                        | 0.12 [-0.29, 0.53]            | -0.10 [-0.44, 0.25]           | 0.13 [-0.02, 0.29]          | 0.14 [-0.04, 0.32]          | 0.29 [-0.24, 0.83]                     |
| Cerebral white matter                                       | -0.13 [-0.54, 0.28]           | -0.06 [-0.49, 0.37]           | -0.10 [-0.26, 0.05]         | 0.08 [-0.12, 0.29]          | -0.37 [-0.91, 0.17]                    |
| Cerebellum gray matter†                                     | 0.03 [-0.39, 0.44]            | -0.03 [-0.38, 0.31]           | 0.03 [-0.28, 0.34]          | 0.17 [-0.01, 0.35]          | -0.21 [-0.75, 0.32]                    |
| Cerebellum white matter†                                    | -0.13 [-0.54, 0.28]           | -0.24 [-0.76, 0.29]           | -0.13 [-0.44, 0.18]         | 0.01 [-0.18, 0.19]          | -0.14 [-0.67, 0.40]                    |
| Third ventricle                                             | 0.03 [-0.38, 0.45]            | -0.01 [-0.35, 0.34]           | -0.10 [-0.41, 0.21]         | -0.09 [-0.25, 0.07]         | 0.37 [-0.17, 0.91]                     |
| Lateral ventricles                                          | 0.15 [-0.26, 0.56]            | -0.01 [-0.35, 0.34]           | 0.08 [-0.13, 0.29]          | -0.04 [-0.20, 0.12]         | 0.80 [0.25, 1.35]*                     |
| <i>Subcortical volumes</i>                                  |                               |                               |                             |                             |                                        |
| Thalamus                                                    | -0.27 [-0.69, 0.15]           | 0.03 [-0.68, 0.75]            | -0.02 [-0.18, 0.14]         | 0.07 [-0.11, 0.26]          | -0.52 [-1.06, 0.02]                    |
| Caudate                                                     | 0.15 [-0.27, 0.57]            | 0.12 [-0.23, 0.47]            | -0.03 [-0.25, 0.2]          | -0.04 [-0.20, 0.13]         | -0.34 [-0.88, 0.19]                    |
| Putamen                                                     | 0.04 [-0.53, 0.60]            | -0.07 [-0.48, 0.61]           | -0.04 [-0.20, 0.12]         | -0.09 [-0.28, 0.10]         | -0.13 [-0.66, 0.41]                    |
| Pallidum                                                    | -0.03 [-0.73, 0.68]           | 0.11 [-0.36, 0.59]            | 0.01 [-0.18, 0.19]          | 0.07 [-0.10, 0.24]          | -0.81 [-1.36, -0.26]*                  |
| Hippocampus                                                 | -0.05 [-0.46, 0.36]           | -0.11 [-0.46, 0.23]           | -0.19 [-0.35, -0.03]*       | 0.18 [0.02, 0.35]*          | -0.54 [-1.08, -0.00]*                  |
| Amygdala                                                    | 0.10 [-0.31, 0.51]            | 0.08 [-0.39, 0.54]            | -0.06 [-0.22, 0.09]         | 0.15 [-0.04, 0.34]          | -0.06 [-0.60, 0.47]                    |
| Accumbens                                                   | -0.30 [-0.96, 0.37]           | -0.03 [-0.37, 0.32]           | 0.11 [-0.09, 0.31]          | 0.05 [-0.16, 0.26]          | -0.10 [-0.63, 0.44]                    |

\*  $p < 0.05$ , uncorrected | \*\*  $q < 0.05$ , corrected | † excluded Olin in cerebellum analyses | <sup>1</sup> Parents only 1 cohort; no meta-analysis

**Table S12b.** Global and subcortical brain measures differences (Cohen's *d* effect sizes [ $\pm$  95% CI]) between *healthy* controls and the different types of *healthy* FDRs-SZ, i.e. MZ co-twins, DZ co-twins, offspring, siblings and parents, controlling for intracranial volume (ICV).

| SCHIZOPHRENIA<br><i>Healthy only - corrected for ICV</i> | MZ co-twins<br>ES $\pm$ 95%CI | DZ co-twins<br>ES $\pm$ 95%CI | Offspring<br>ES $\pm$ 95%CI | Siblings<br>ES $\pm$ 95%CI | Parents<br>ES $\pm$ 95%CI |
|----------------------------------------------------------|-------------------------------|-------------------------------|-----------------------------|----------------------------|---------------------------|
| <i>Global measures</i>                                   |                               |                               |                             |                            |                           |
| ICV                                                      | -                             | -                             | -                           | -                          | -                         |
| Total brain                                              | -0.20 [-0.57, 0.17]           | -0.16 [-0.46, 0.13]           | -0.28 [-0.63, 0.07]         | -0.10 [-0.21, -0.00]*      | -0.11 [-0.54, 0.31]       |
| Surface area                                             | -0.26 [-0.66, 0.14]           | -0.11 [-0.40, 0.19]           | -0.15 [-0.44, 0.14]         | 0.04 [-0.10, 0.18]         | 0.13 [-0.13, 0.40]        |
| Cortical thickness                                       | -0.07 [-0.66, 0.53]           | -0.41 [-1.29, 0.46]           | -0.13 [-0.47, 0.22]         | -0.12 [-0.27, 0.04]        | -0.15 [-0.41, 0.11]       |
| Cortical gray matter                                     | -0.23 [-0.60, 0.14]           | -0.53 [-1.51, 0.45]           | -0.23 [-0.65, 0.18]         | -0.04 [-0.14, 0.06]        | 0.04 [-0.27, 0.35]        |
| Cerebral white matter                                    | -0.14 [-0.53, 0.26]           | -0.17 [-0.46, 0.13]           | -0.18 [-0.39, 0.03]         | -0.08 [-0.18, 0.02]        | -0.13 [-0.39, 0.14]       |
| Cerebellum gray matter                                   | 0.19 [-0.18, 0.56]            | 0.24 [-0.05, 0.54]            | -0.08 [-0.29, 0.14]         | -0.11 [-0.21, -0.01]*      | -0.18 [-0.46, 0.10]       |
| Cerebellum white matter                                  | 0.23 [-0.14, 0.60]            | 0.02 [-0.28, 0.32]            | -0.13 [-0.34, 0.09]         | -0.09 [-0.19, 0.01]        | -0.29 [-0.55, -0.02]*     |
| Third ventricle                                          | 0.49 [0.12, 0.86]*            | 0.32 [0.02, 0.61]*            | 0.15 [-0.06, 0.37]          | 0.12 [-0.06, 0.29]         | 0.04 [-0.31, 0.39]        |
| Lateral ventricles                                       | 0.29 [-0.25, 0.83]            | 0.01 [-0.50, 0.53]            | 0.16 [-0.09, 0.42]          | 0.04 [-0.06, 0.14]         | -0.02 [-0.73, 0.68]       |
| <i>Subcortical volumes</i>                               |                               |                               |                             |                            |                           |
| Thalamus                                                 | -0.04 [-0.42, 0.33]           | -0.40 [-0.97, 0.17]           | -0.17 [-0.52, 0.18]         | -0.08 [-0.25, 0.08]        | -0.26 [-0.52, 0.00]       |
| Caudate                                                  | 0.27 [-0.10, 0.64]            | -0.20 [-0.50, 0.11]           | -0.19 [-0.40, 0.03]         | -0.04 [-0.14, 0.06]        | 0.04 [-0.22, 0.31]        |
| Putamen                                                  | 0.12 [-0.27, 0.50]            | -0.16 [-0.59, 0.26]           | -0.27 [-0.54, -0.00]*       | -0.03 [-0.13, 0.07]        | -0.15 [-0.47, 0.17]       |
| Pallidum                                                 | 0.28 [-0.11, 0.67]            | -0.01 [-0.31, 0.30]           | -0.30 [-0.51, -0.08]*       | -0.05 [-0.15, 0.05]        | 0.07 [-0.20, 0.33]        |
| Hippocampus                                              | -0.17 [-0.55, 0.21]           | -0.11 [-0.41, 0.20]           | -0.14 [-0.36, 0.07]         | -0.06 [-0.16, 0.04]        | -0.07 [-0.34, 0.19]       |
| Amygdala                                                 | -0.22 [-0.73, 0.28]           | -0.02 [-0.33, 0.28]           | -0.15 [-0.36, 0.07]         | -0.04 [-0.19, 0.11]        | 0.48 [0.15, 0.80]*        |
| Accumbens                                                | -0.16 [-0.59, 0.27]           | -0.01 [-0.34, 0.32]           | -0.19 [-0.40, 0.03]         | -0.03 [-0.14, 0.07]        | -0.06 [-0.33, 0.22]       |

\*  $p < 0.05$ , uncorrected | \*\*  $q < 0.05$ , corrected

**Table S13.** Meta-regression results for relationship between FDRs-BD (left) and FDRs-SZ (right) compared with controls and mean age.

|                            | BIPOLAR DISORDER |         |       |                | SCHIZOPHRENIA |         |       |                |
|----------------------------|------------------|---------|-------|----------------|---------------|---------|-------|----------------|
|                            | Beta             | p-value | SE    | 95% CI         | Beta          | p-value | SE    | 95% CI         |
| <i>Global measures</i>     |                  |         |       |                |               |         |       |                |
| ICV                        | -0.003           | 0.535   | 0.004 | -0.011 – 0.006 | 0.005         | 0.310   | 0.005 | -0.004 – 0.013 |
| Total brain                | 0.000            | 0.965   | 0.004 | -0.009 – 0.009 | 0.006         | 0.202   | 0.004 | -0.003 – 0.014 |
| Surface area               | 0.001            | 0.907   | 0.005 | -0.009 – 0.010 | 0.008         | 0.086   | 0.005 | -0.001 – 0.017 |
| Cortical thickness         | 0.000            | 0.906   | 0.004 | -0.008 – 0.007 | 0.001         | 0.846   | 0.005 | -0.009 – 0.011 |
| Cortical gray matter       | 0.001            | 0.892   | 0.005 | -0.009 – 0.010 | 0.009         | 0.067   | 0.005 | -0.001 – 0.018 |
| Cerebral white matter      | -0.001           | 0.868   | 0.004 | -0.009 – 0.008 | 0.003         | 0.432   | 0.004 | -0.004 – 0.010 |
| Cerebellum gray matter†    | 0.000            | 0.989   | 0.005 | -0.009 – 0.009 | 0.005         | 0.185   | 0.004 | -0.002 – 0.012 |
| Cerebellum white matter†   | 0.002            | 0.711   | 0.005 | -0.009 – 0.012 | -0.001        | 0.851   | 0.004 | -0.008 – 0.007 |
| Third ventricle            | 0.006            | 0.175   | 0.004 | -0.003 – 0.014 | -0.001        | 0.780   | 0.005 | -0.011 – 0.008 |
| Lateral ventricles         | 0.000            | 0.926   | 0.004 | -0.008 – 0.008 | -0.001        | 0.852   | 0.004 | -0.009 – 0.007 |
| <i>Subcortical volumes</i> |                  |         |       |                |               |         |       |                |
| Thalamus                   | -0.005           | 0.172   | 0.004 | -0.013 – 0.002 | 0.002         | 0.572   | 0.004 | -0.005 – 0.009 |
| Caudate                    | -0.005           | 0.182   | 0.004 | -0.012 – 0.002 | 0.004         | 0.255   | 0.004 | -0.003 – 0.012 |
| Putamen                    | -0.002           | 0.701   | 0.004 | -0.010 – 0.007 | 0.001         | 0.828   | 0.004 | -0.006 – 0.008 |
| Pallidum                   | -0.003           | 0.436   | 0.004 | -0.012 – 0.005 | 0.004         | 0.316   | 0.004 | -0.003 – 0.011 |
| Hippocampus                | 0.003            | 0.423   | 0.004 | -0.004 – 0.010 | 0.005         | 0.153   | 0.004 | -0.002 – 0.012 |
| Amygdala                   | 0.003            | 0.424   | 0.004 | -0.004 – 0.010 | 0.013         | 0.008*  | 0.005 | 0.003 – 0.022  |
| Accumbens                  | -0.005           | 0.280   | 0.005 | -0.014 – 0.004 | 0.004         | 0.347   | 0.004 | -0.004 – 0.011 |

\*  $p < 0.05$ , uncorrected | \*\*  $q < 0.05$ , corrected | † excluded Olin in cerebellum analyses

Supplementary Figure S1i-xvii. Forest plots per region of interest

ICV

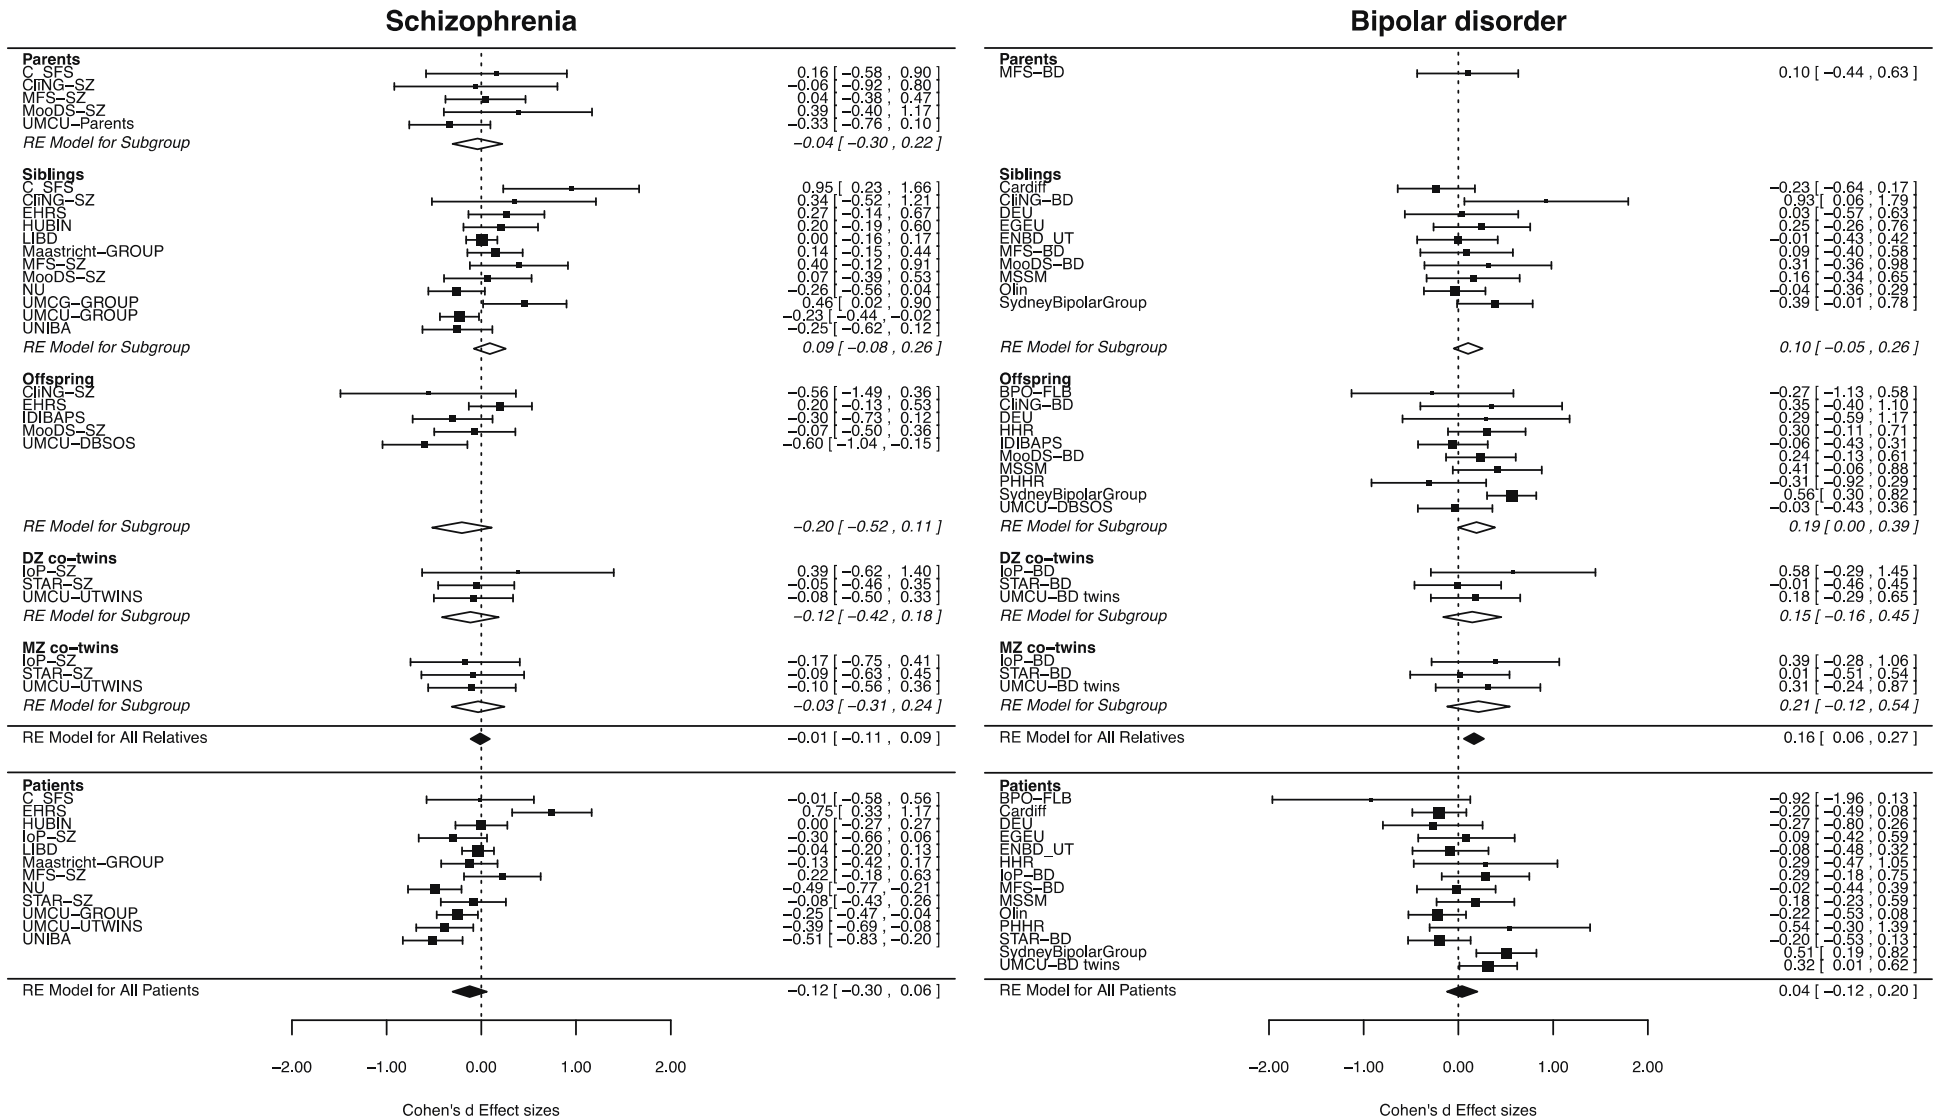

# total brain volume

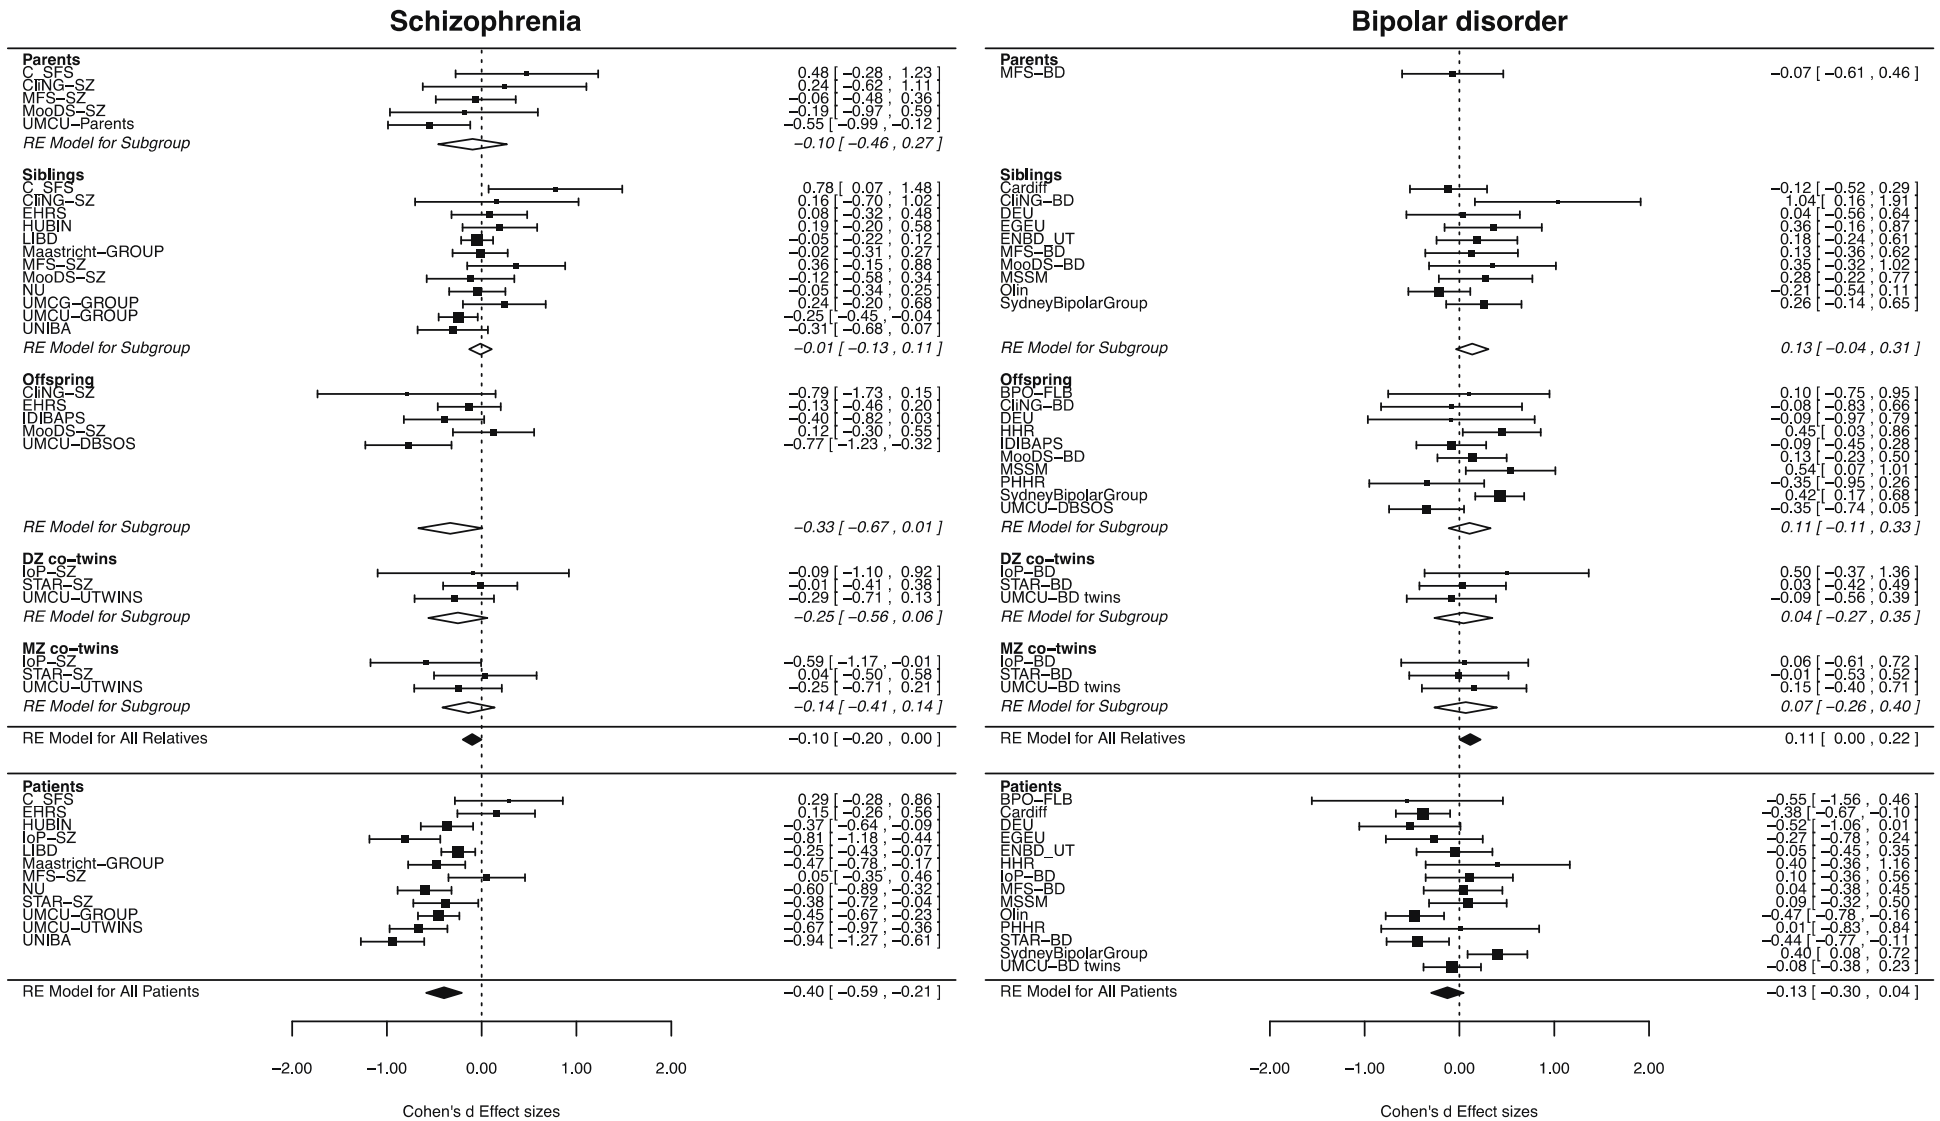

# cortical gray matter

## Schizophrenia

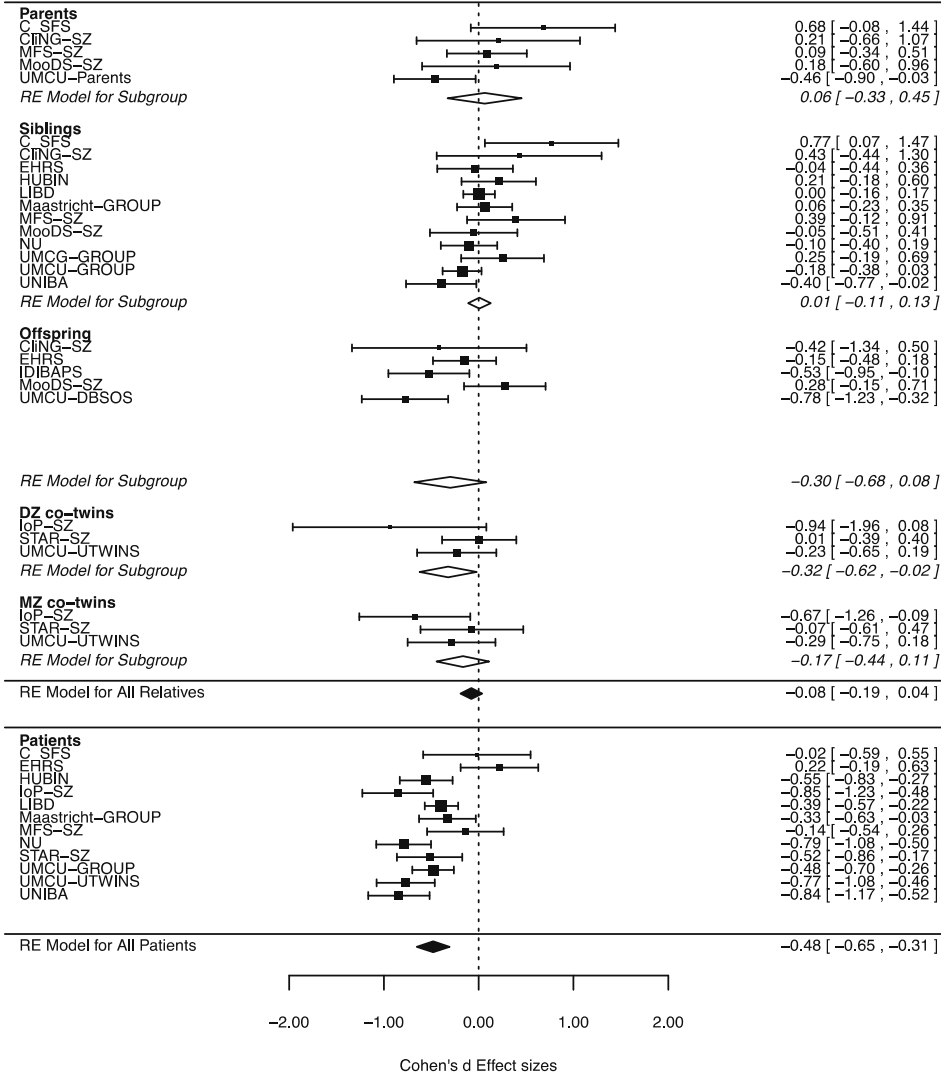

## Bipolar disorder

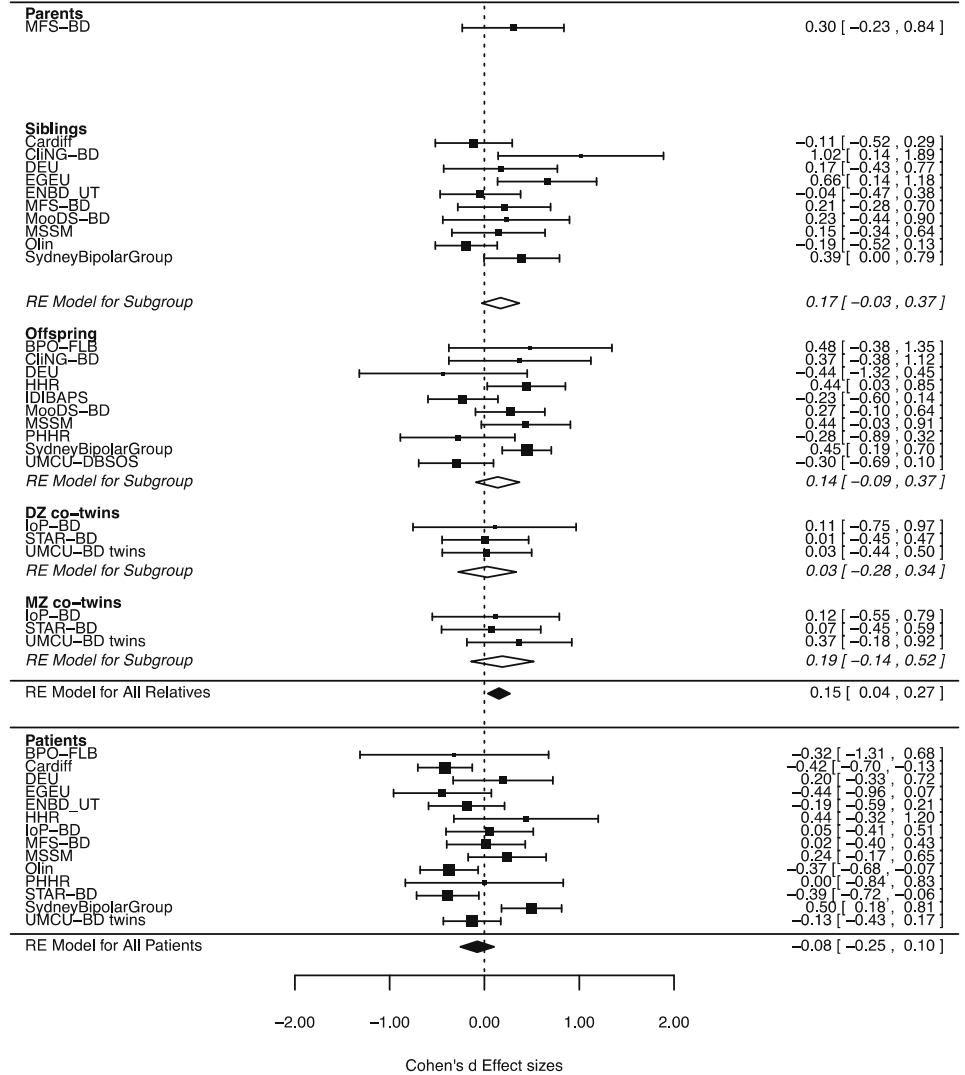



# cerebral white matter

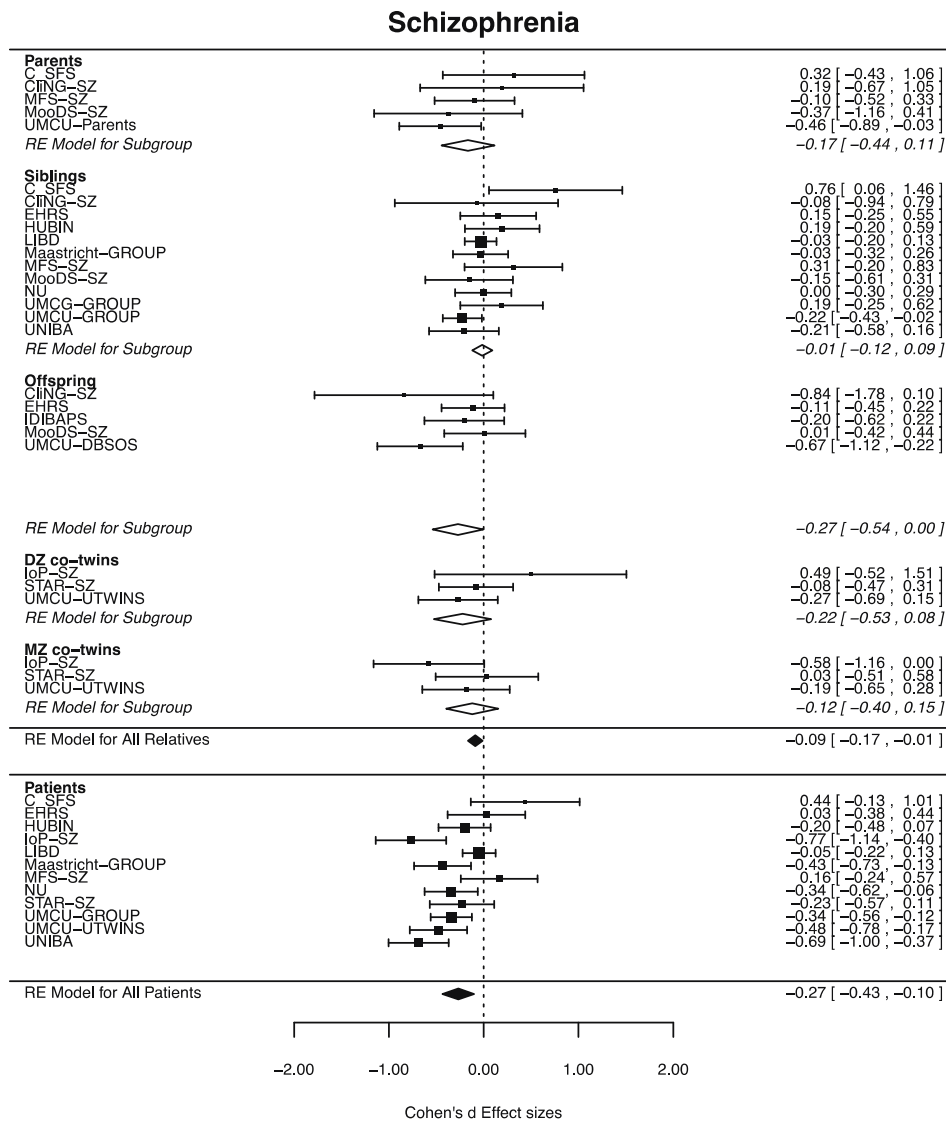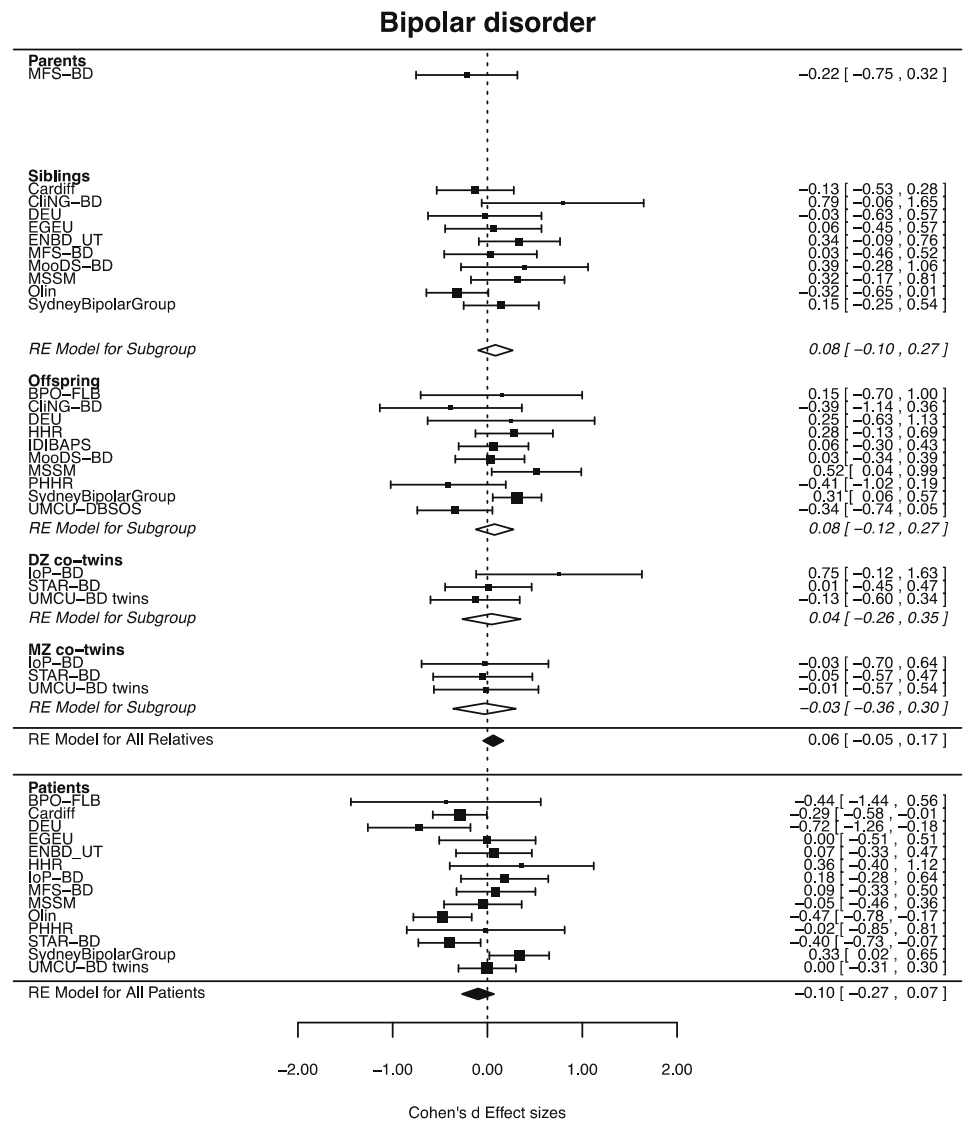

# cerebellum gray matter

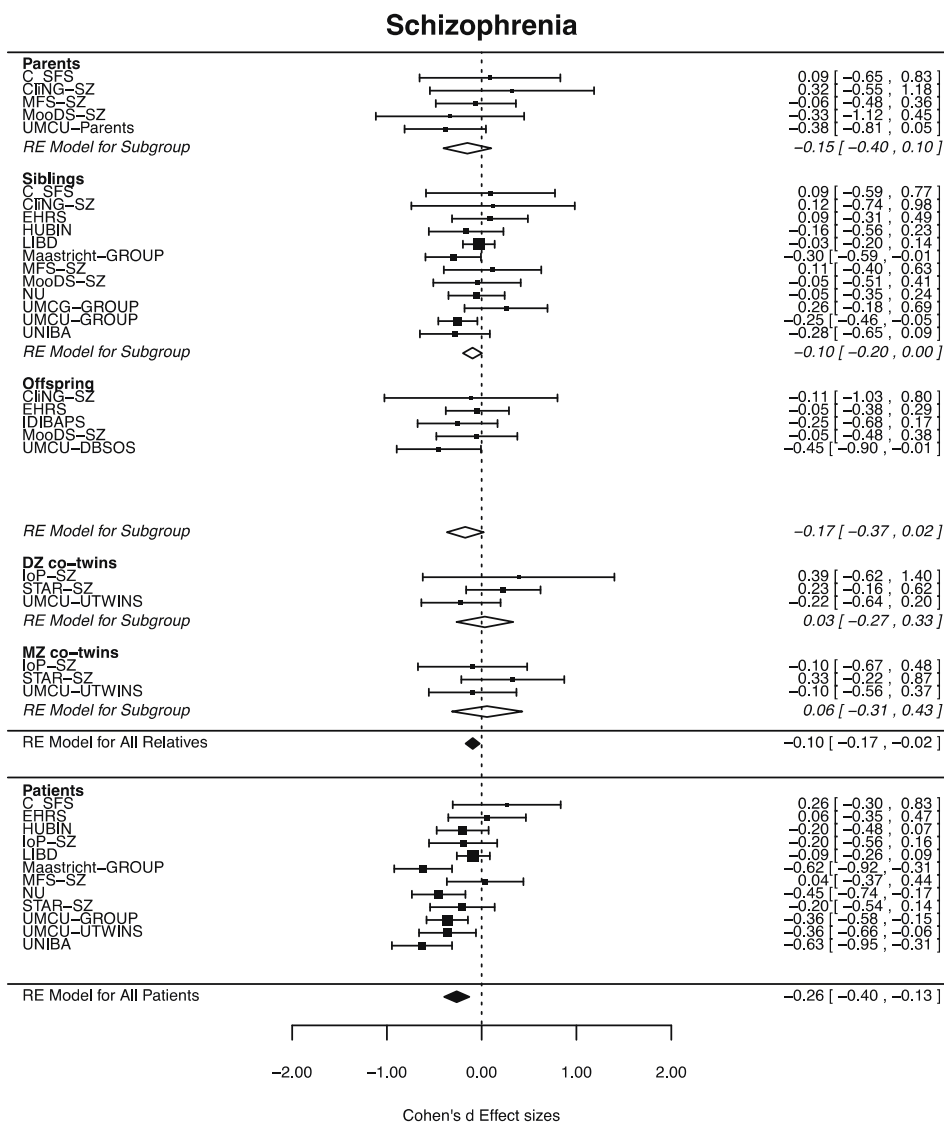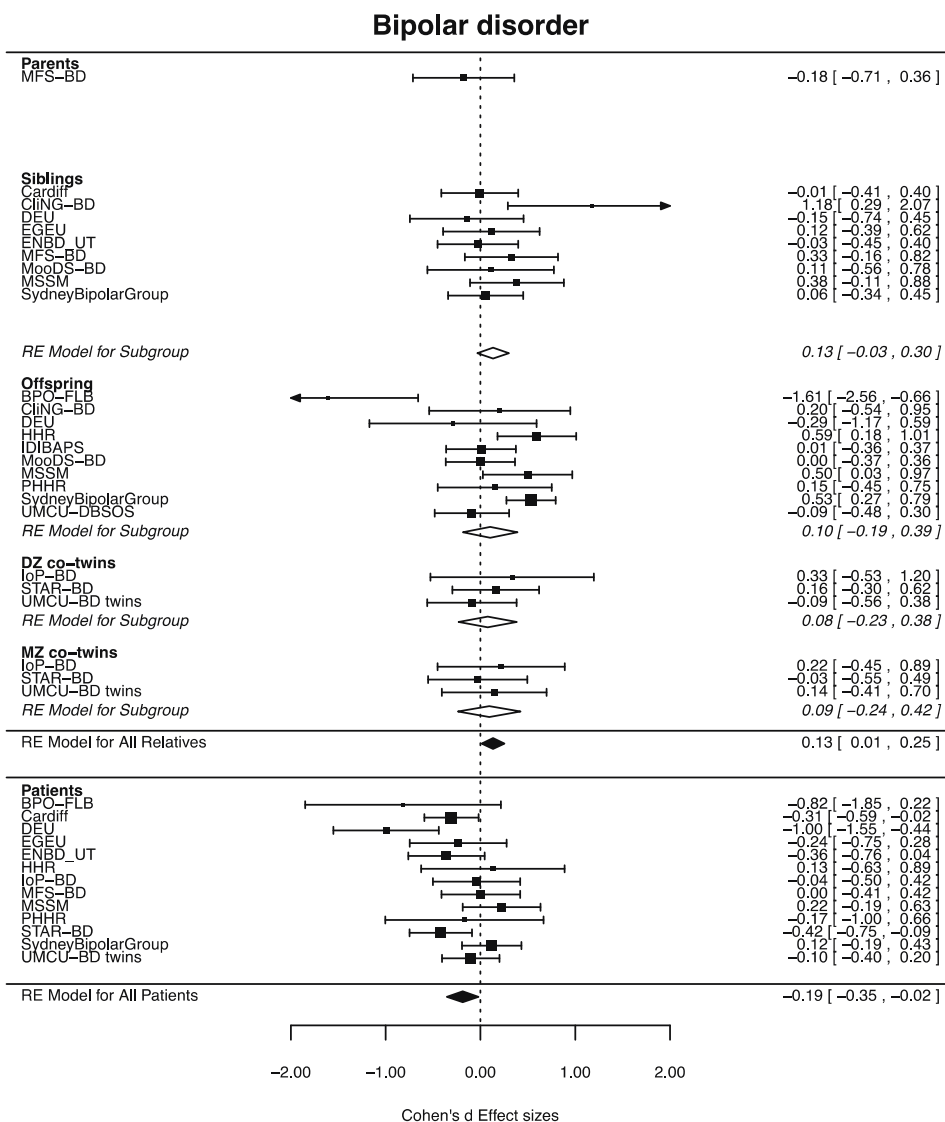

# cerebellum white matter

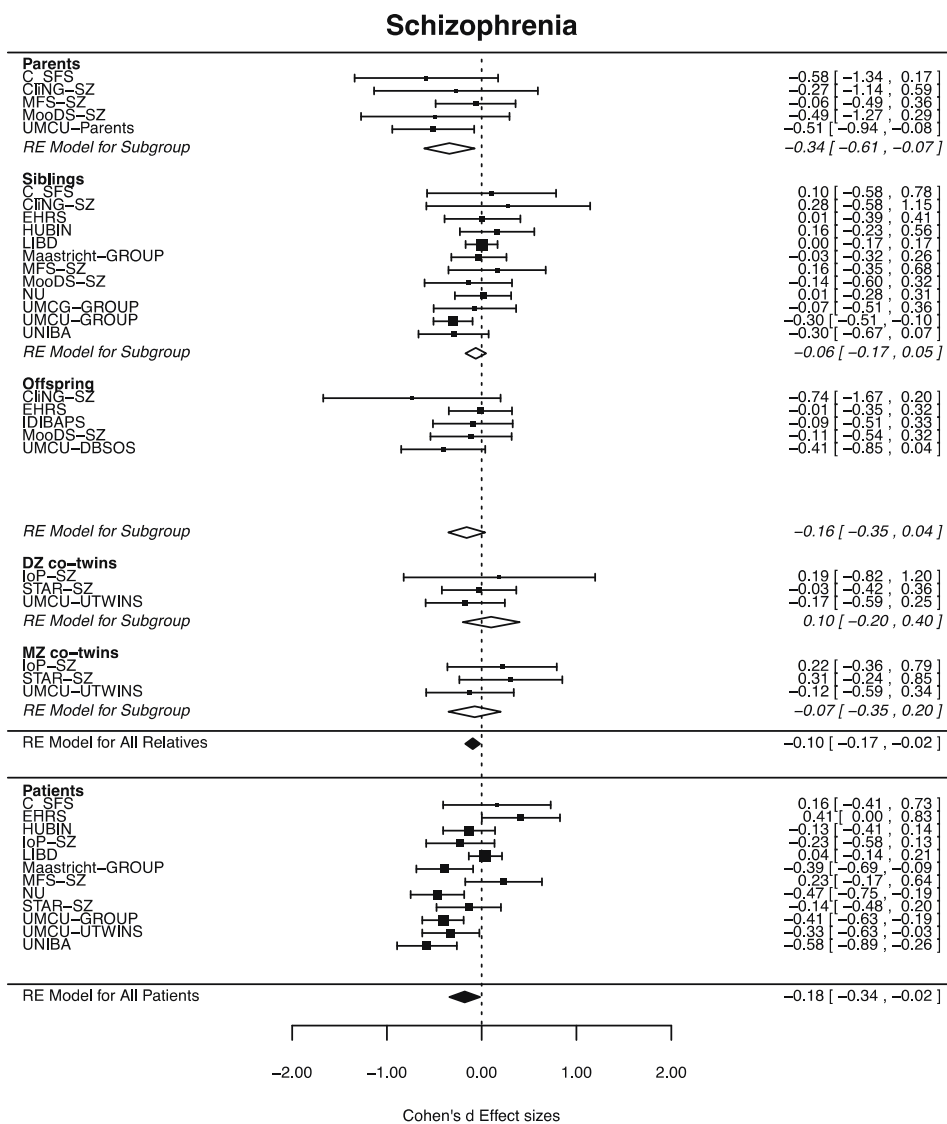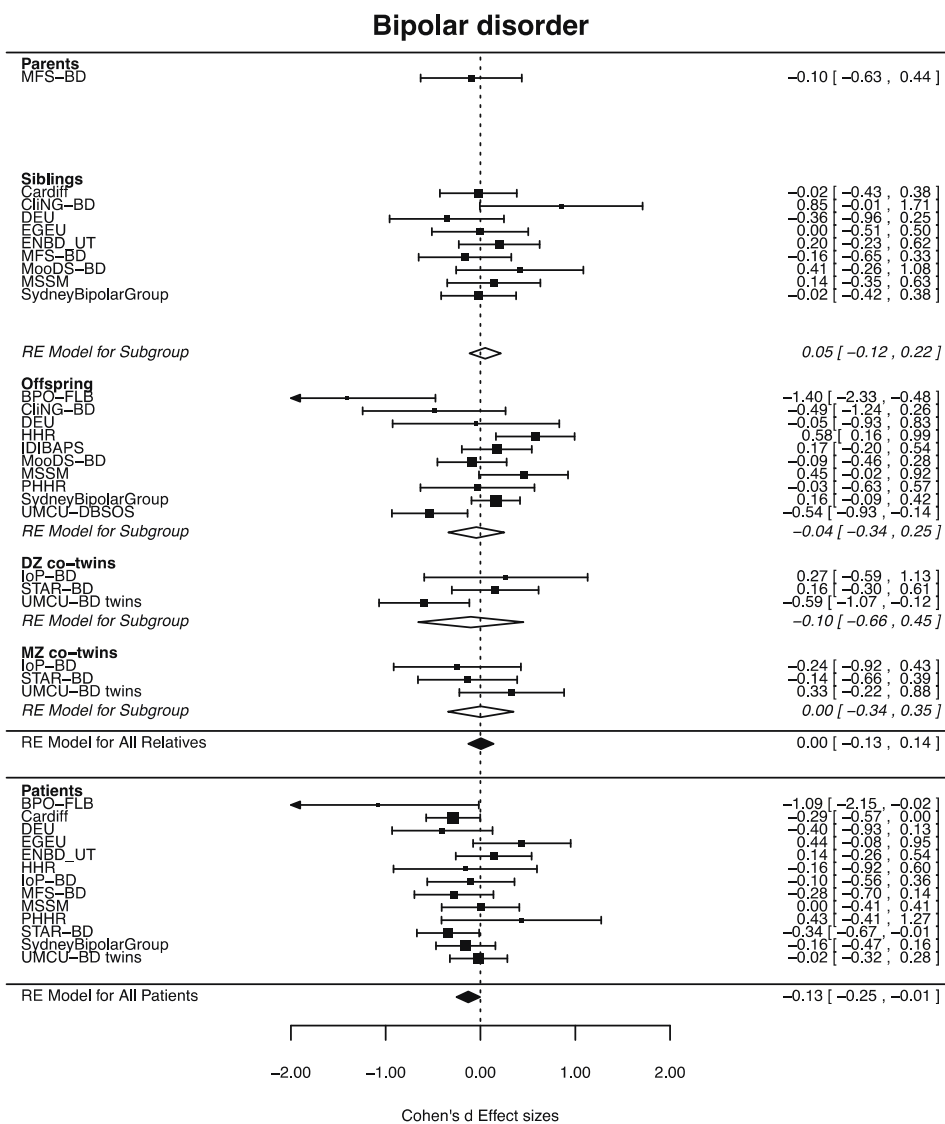

# lateral ventricles

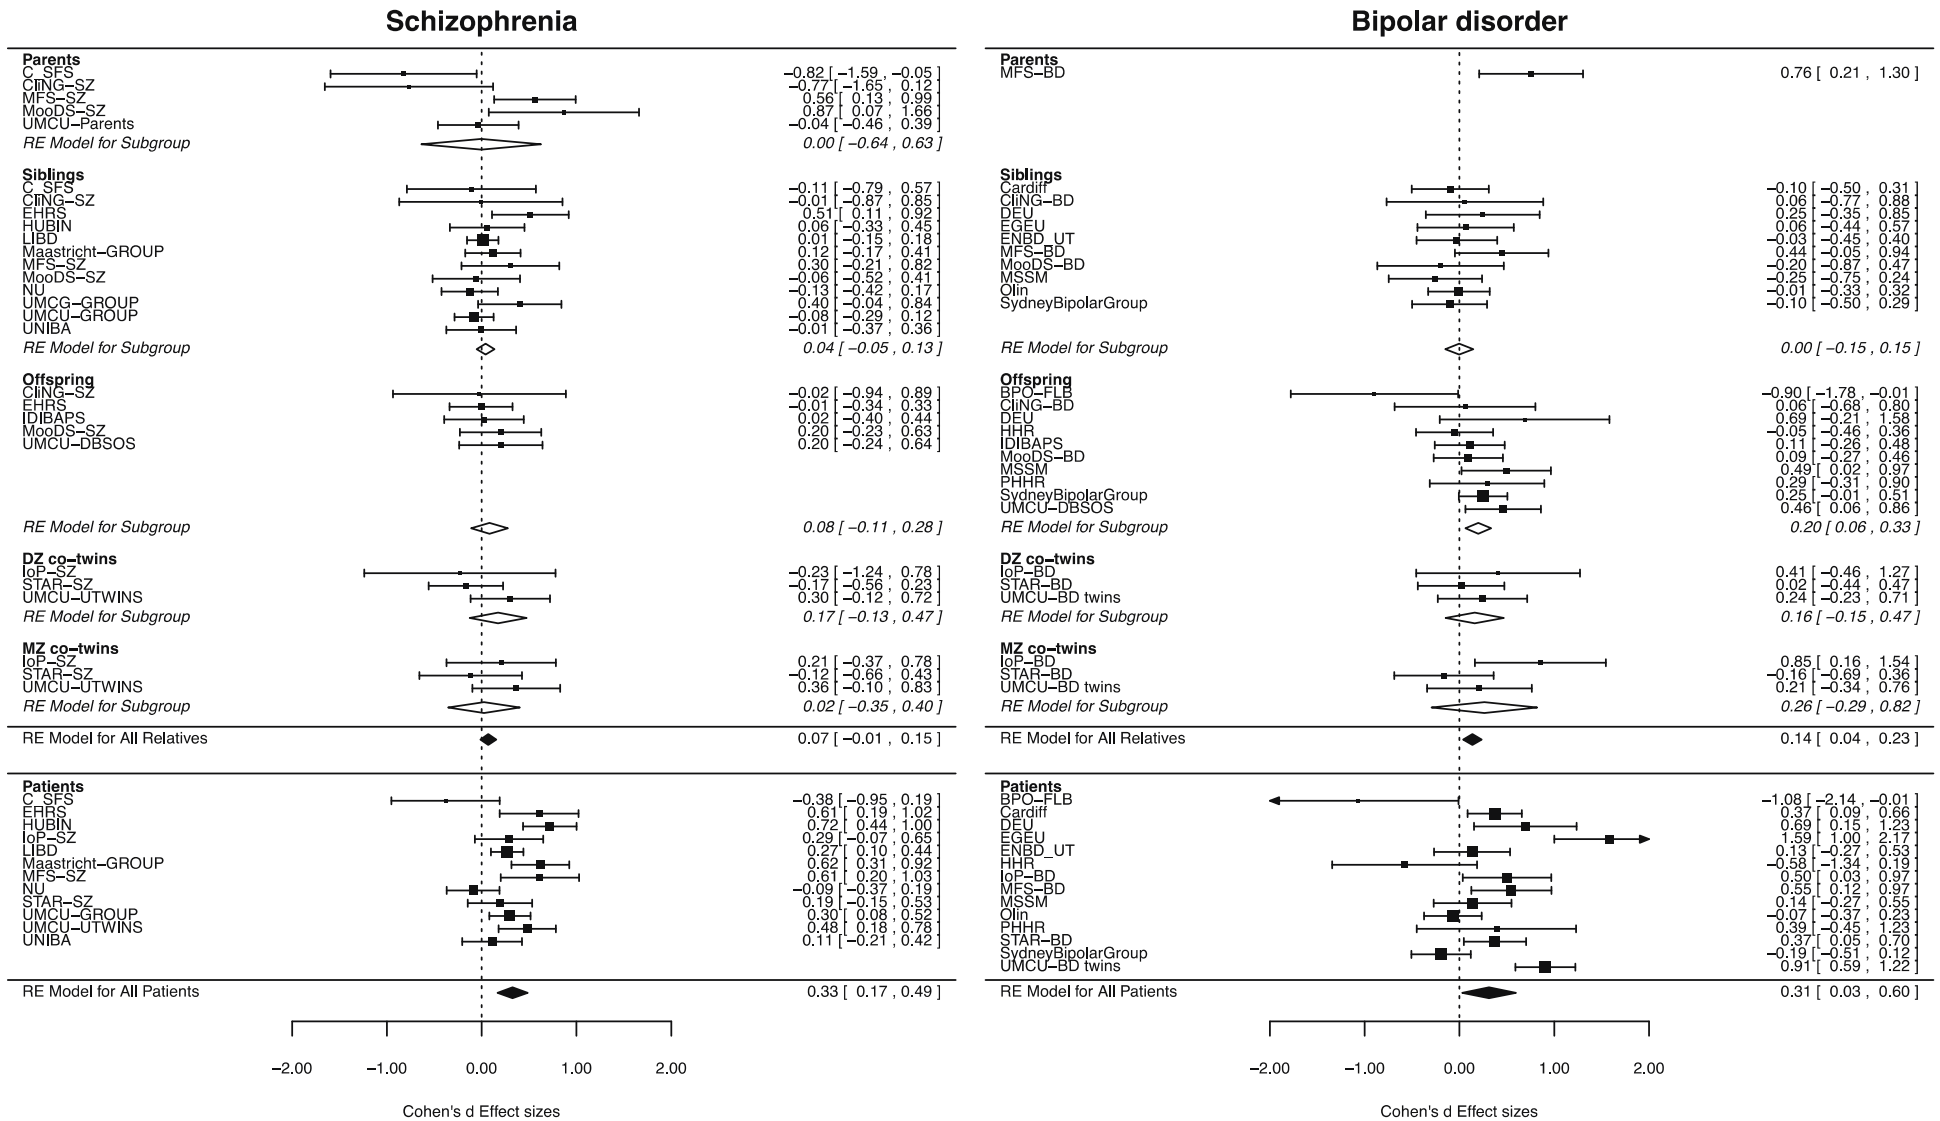

### third ventricle

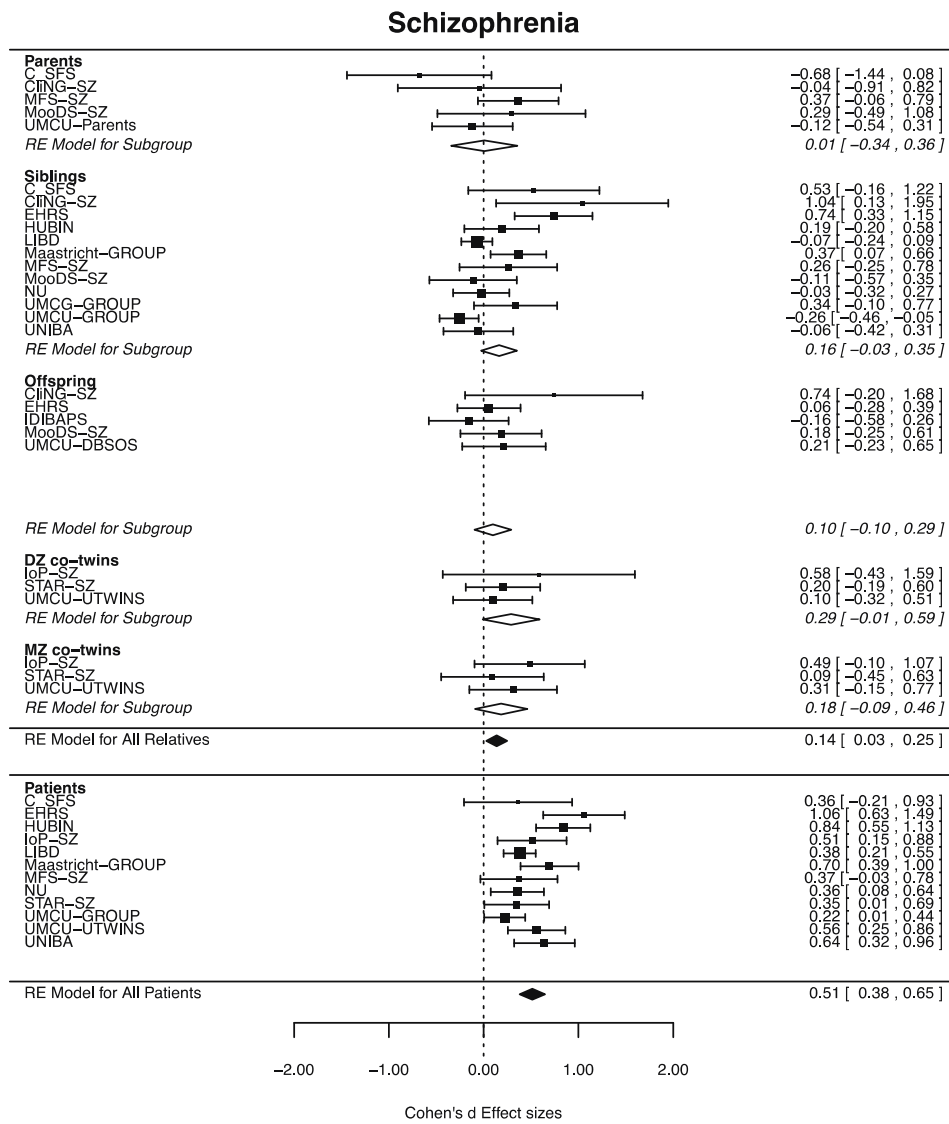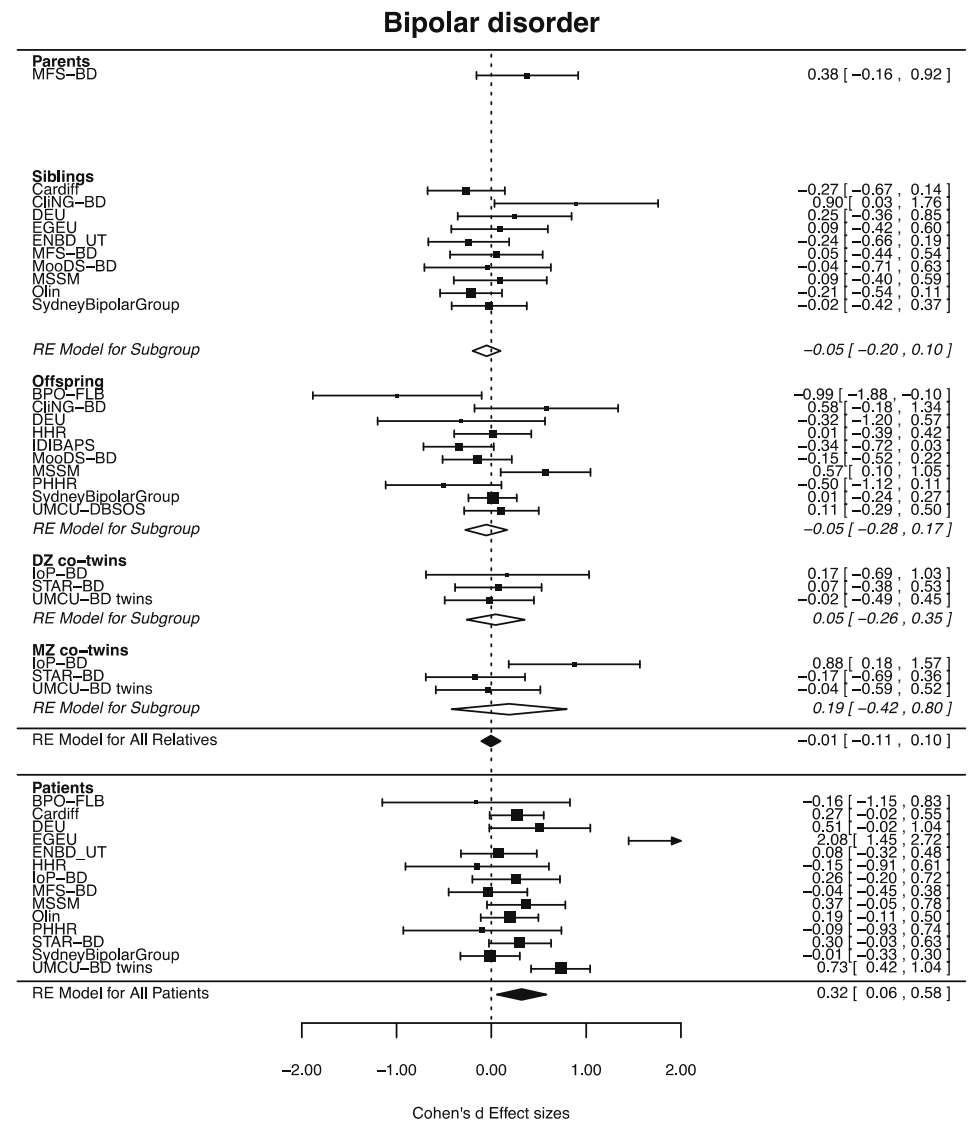

# surface area

## Schizophrenia

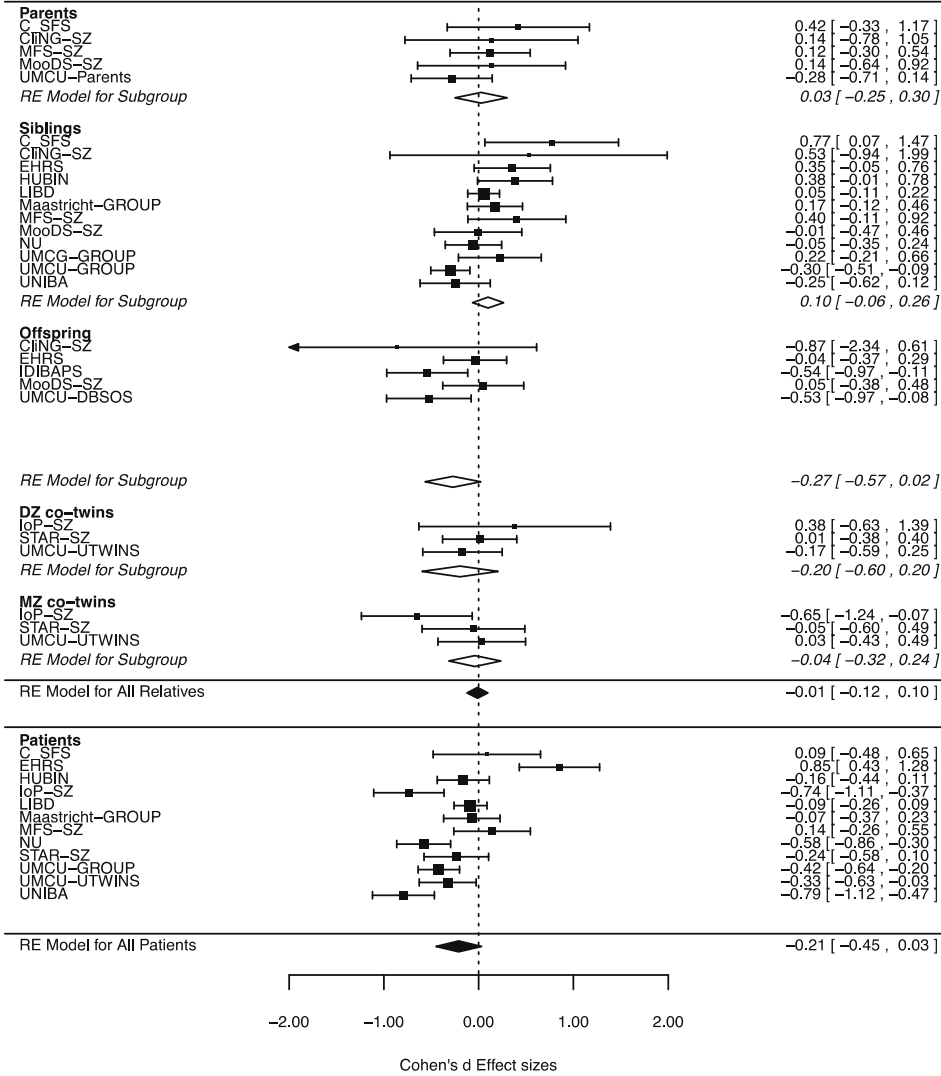

## Bipolar disorder

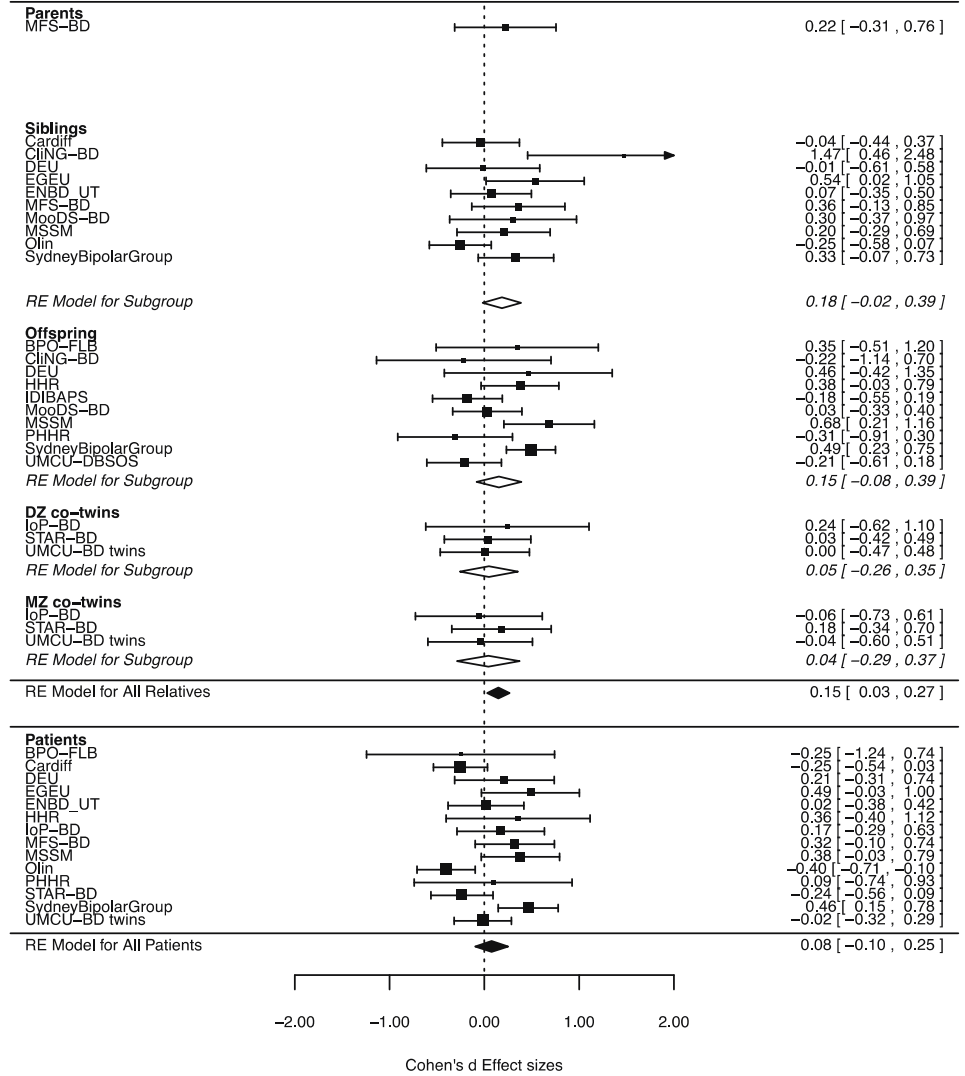

# cortical thickness

## Schizophrenia

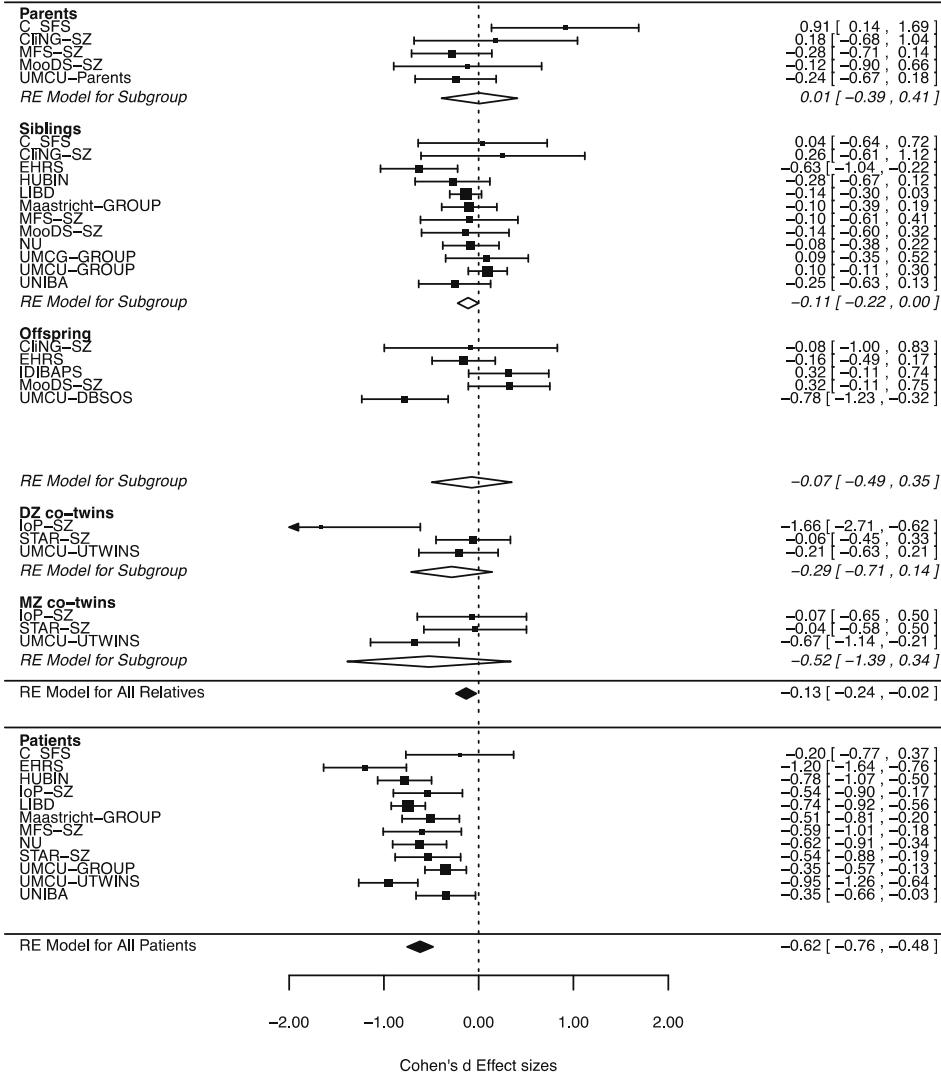

## Bipolar disorder

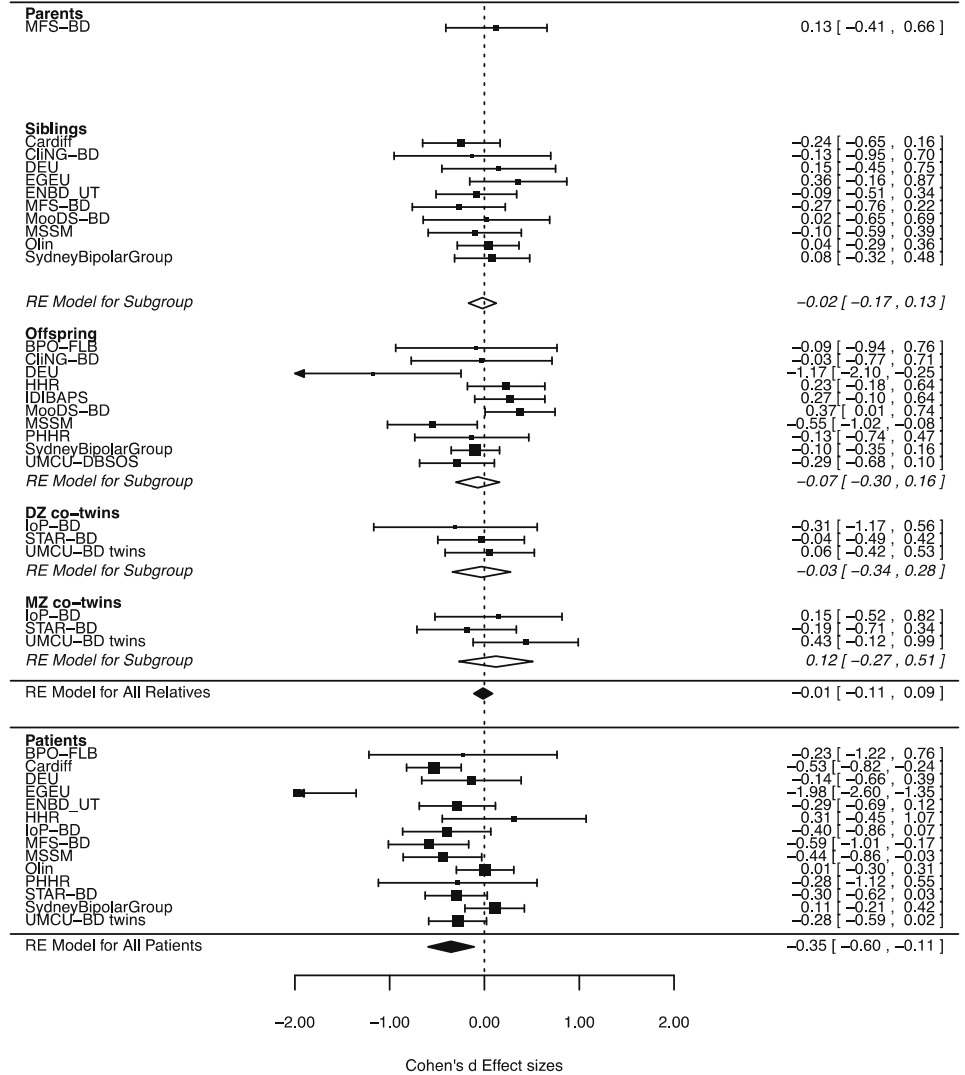

# thalamus

## Schizophrenia

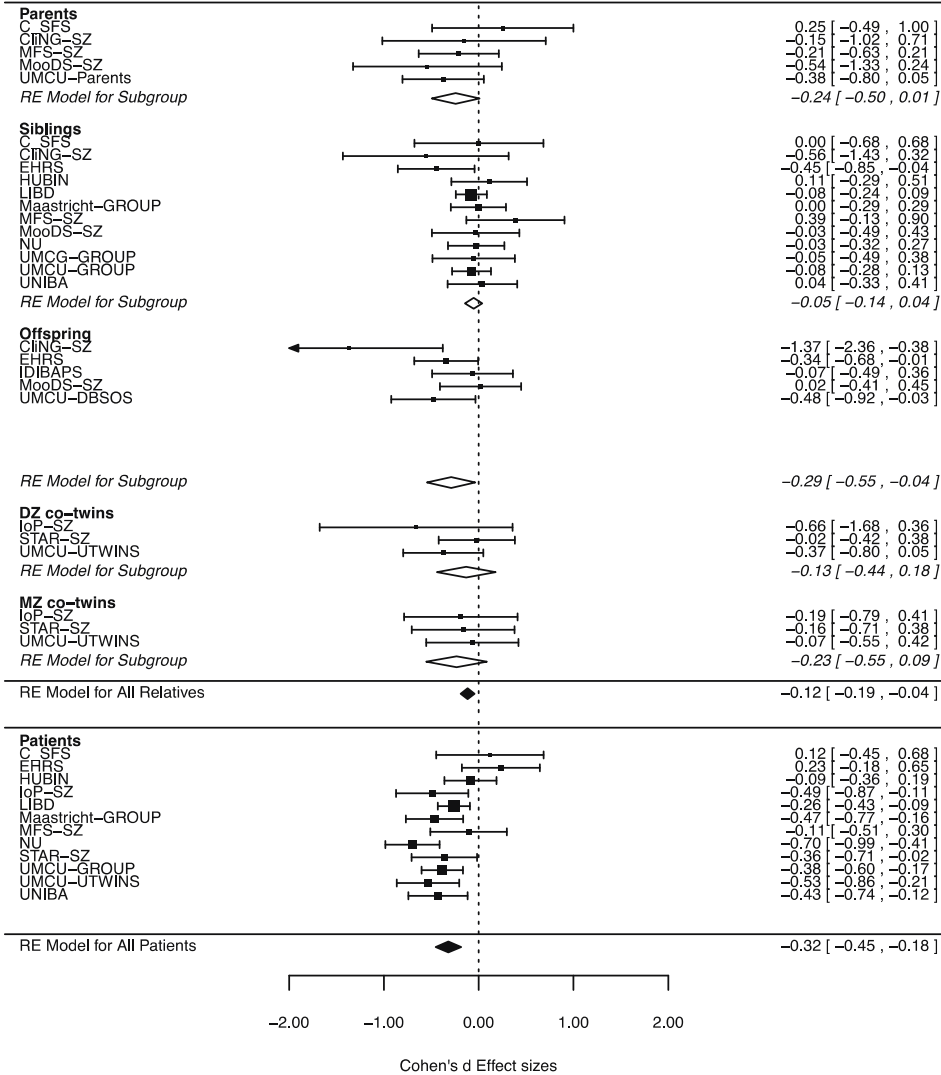

## Bipolar disorder

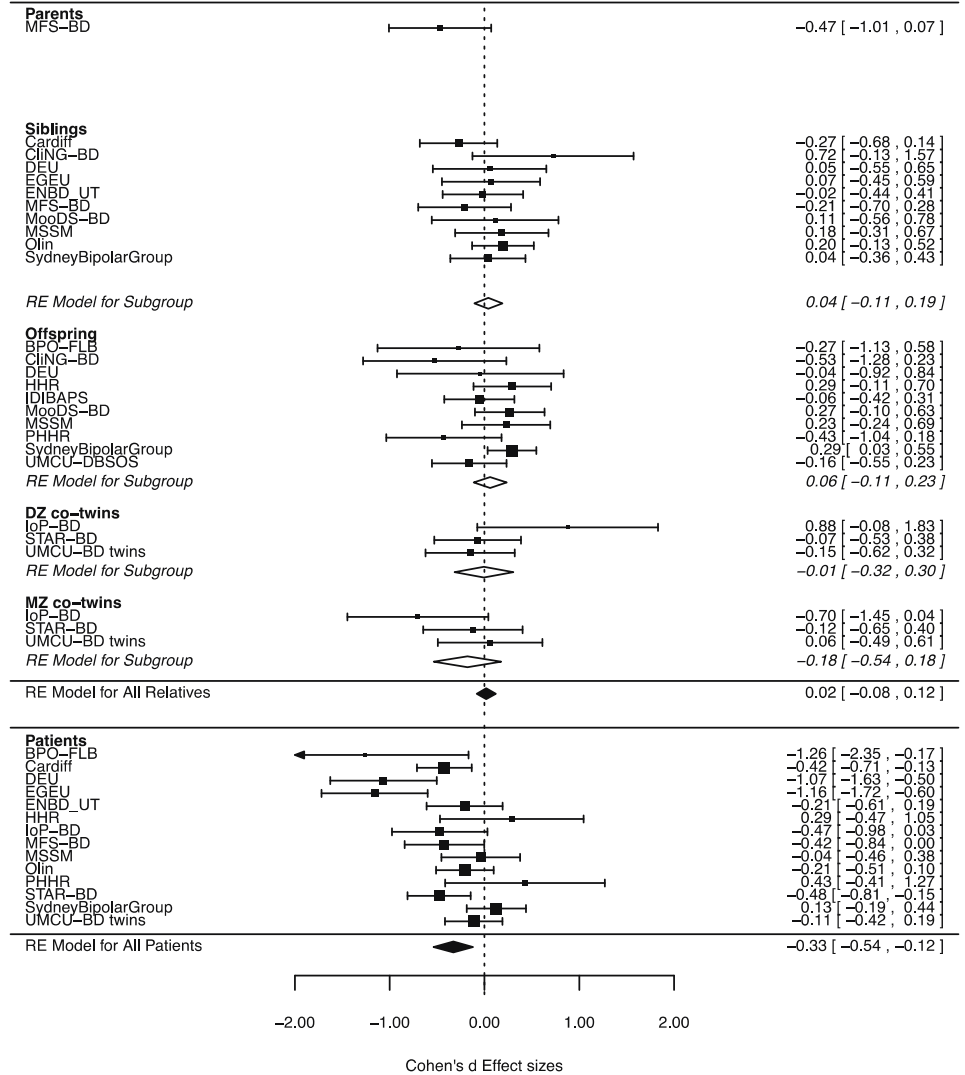



# caudate

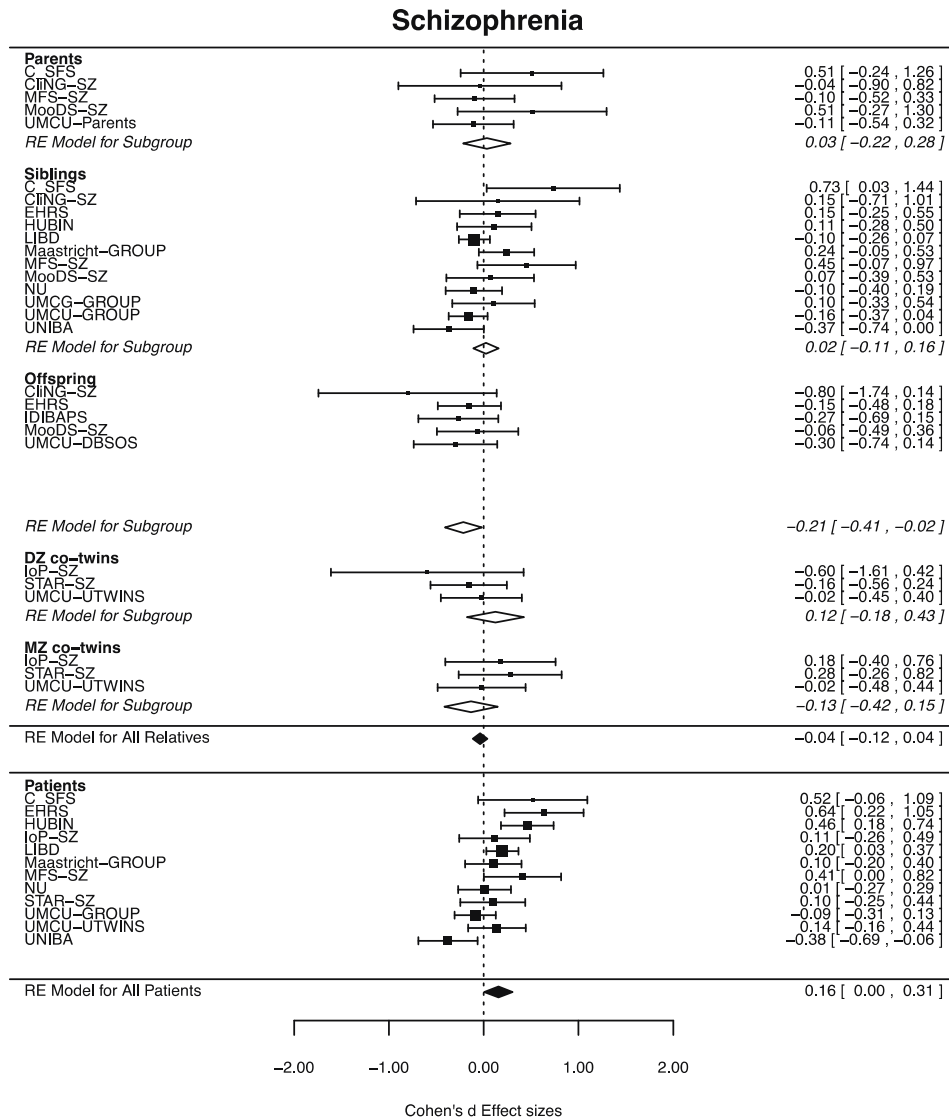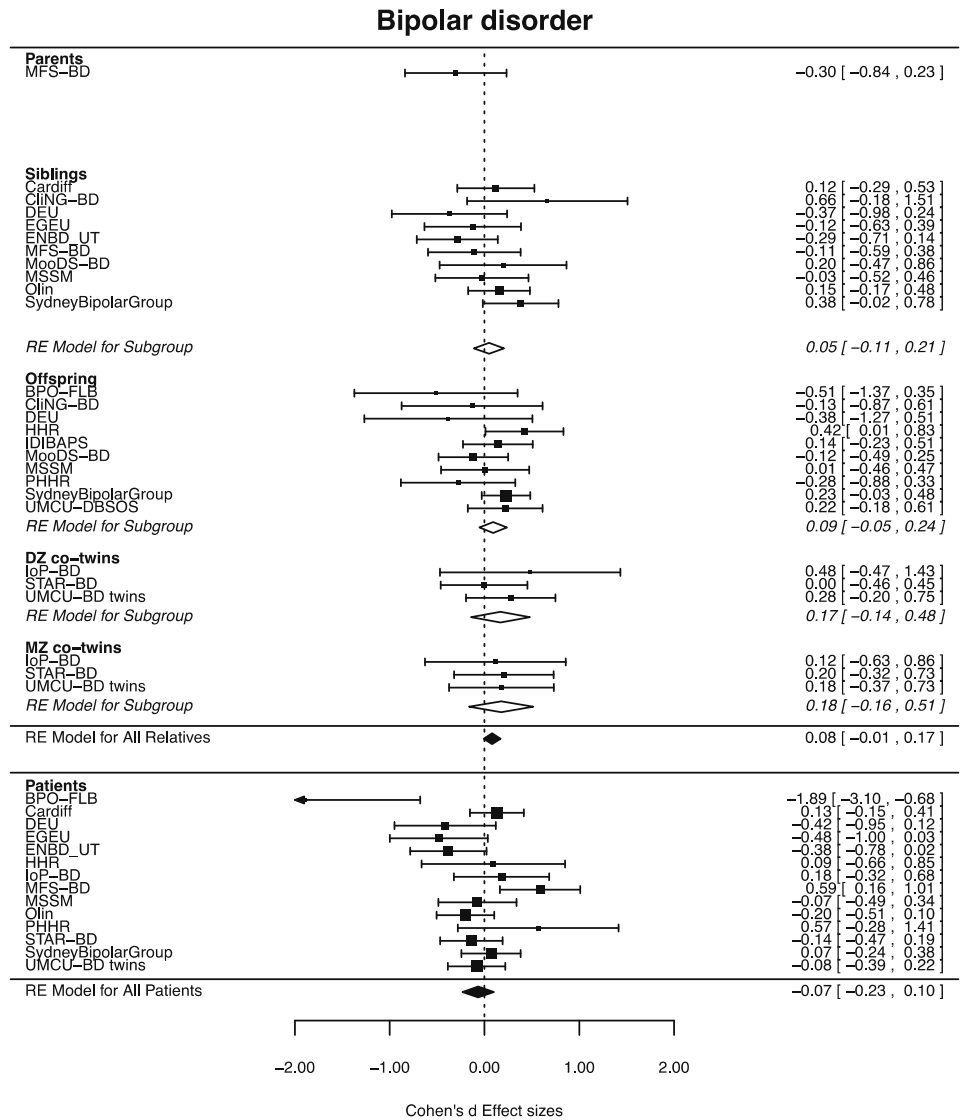

# putamen

## Schizophrenia

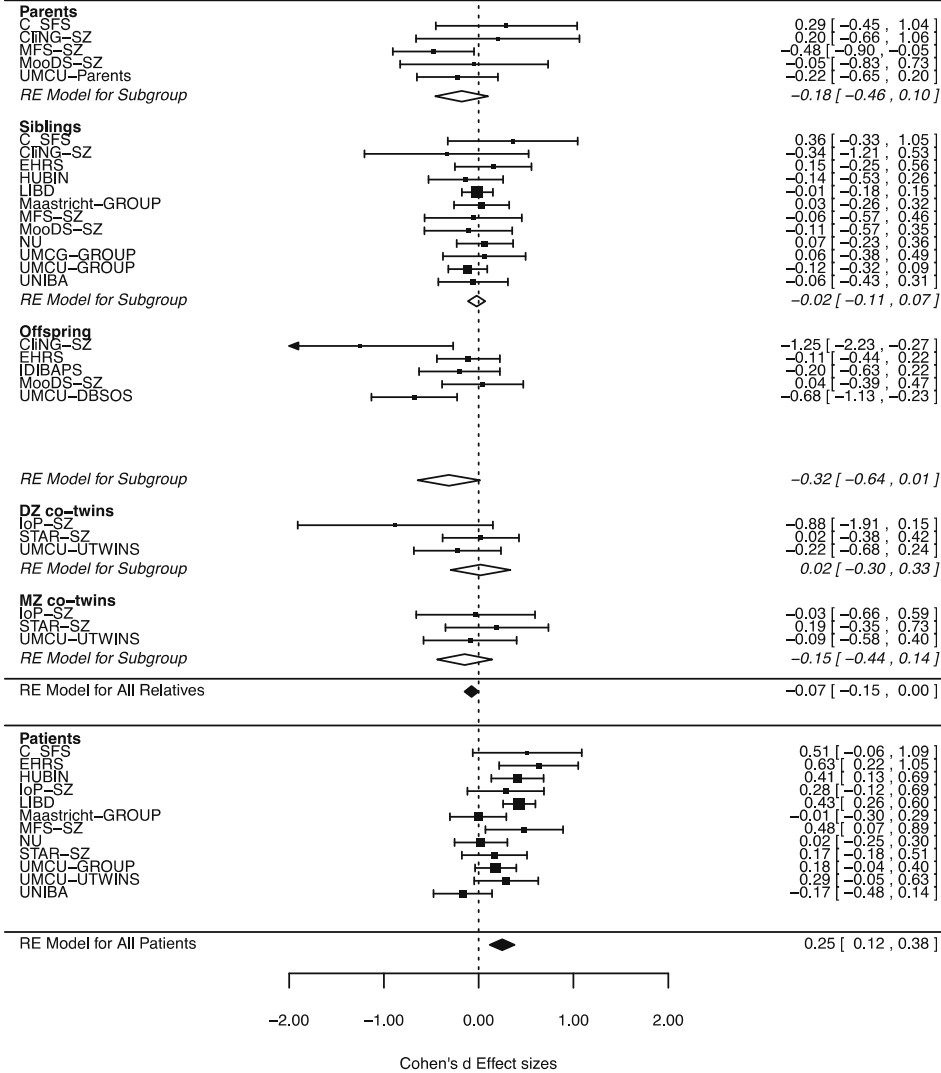

## Bipolar disorder

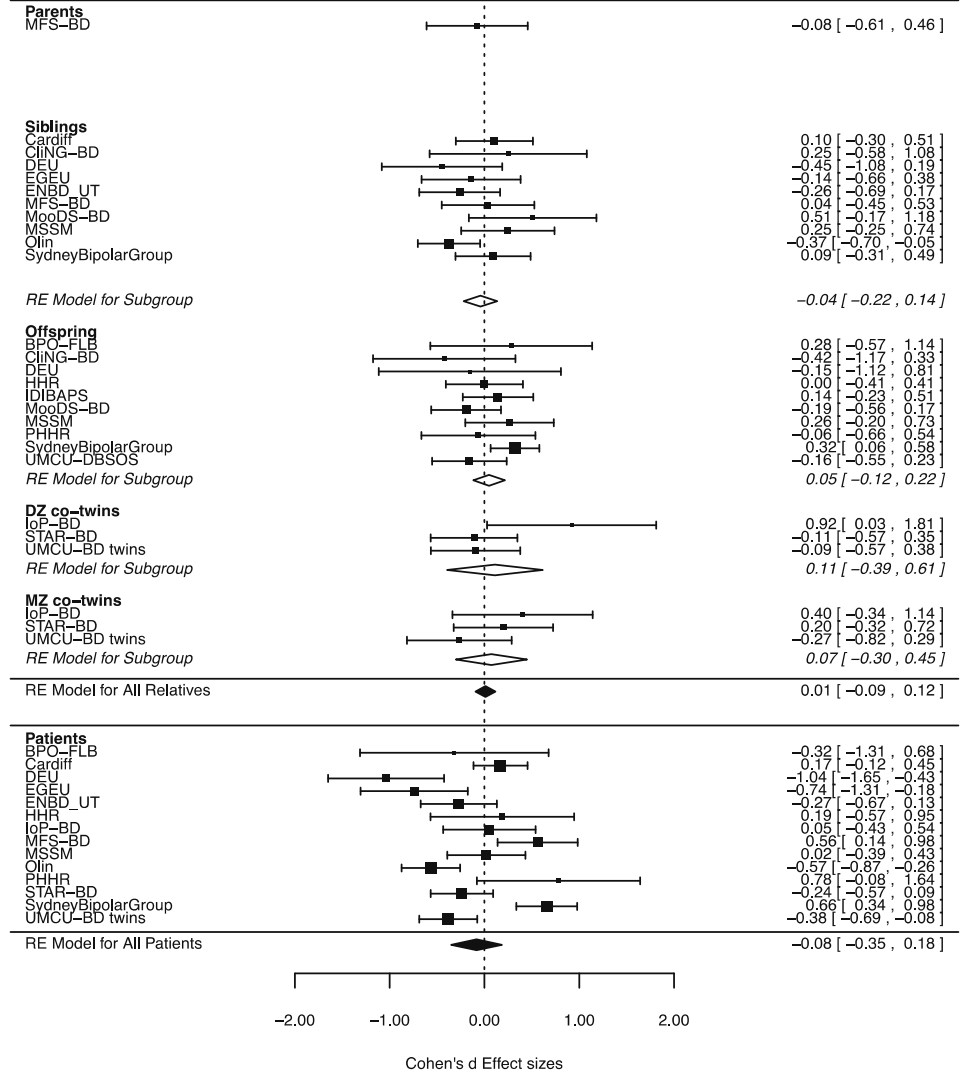

# pallidum

## Schizophrenia

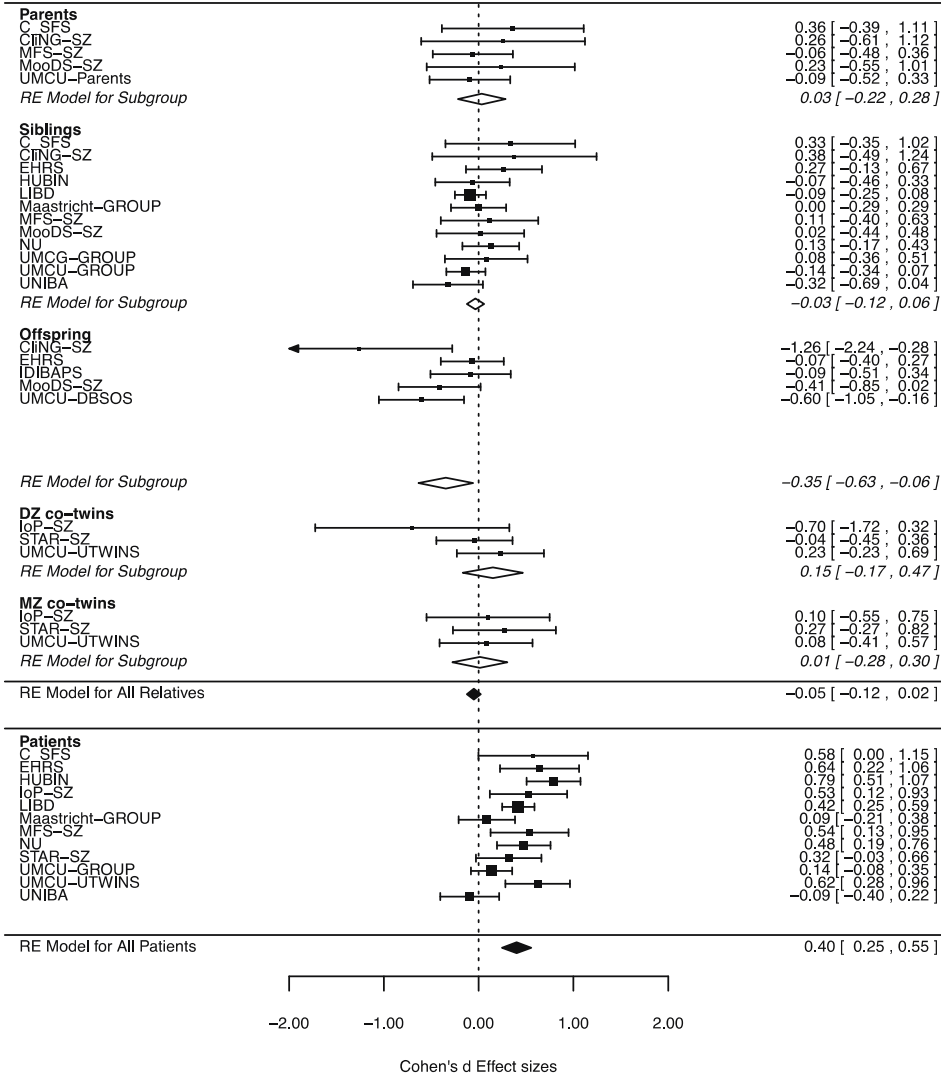

## Bipolar disorder

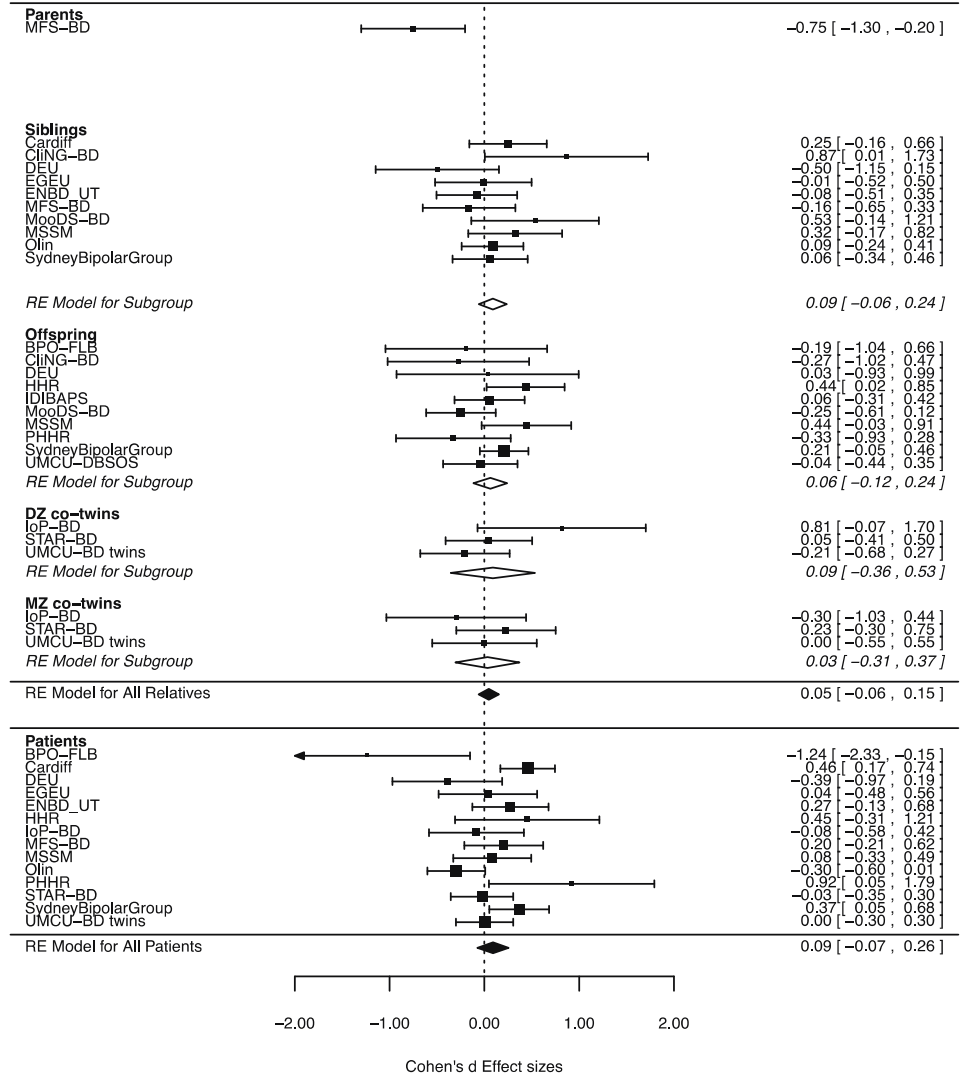

# hippocampus

## Schizophrenia

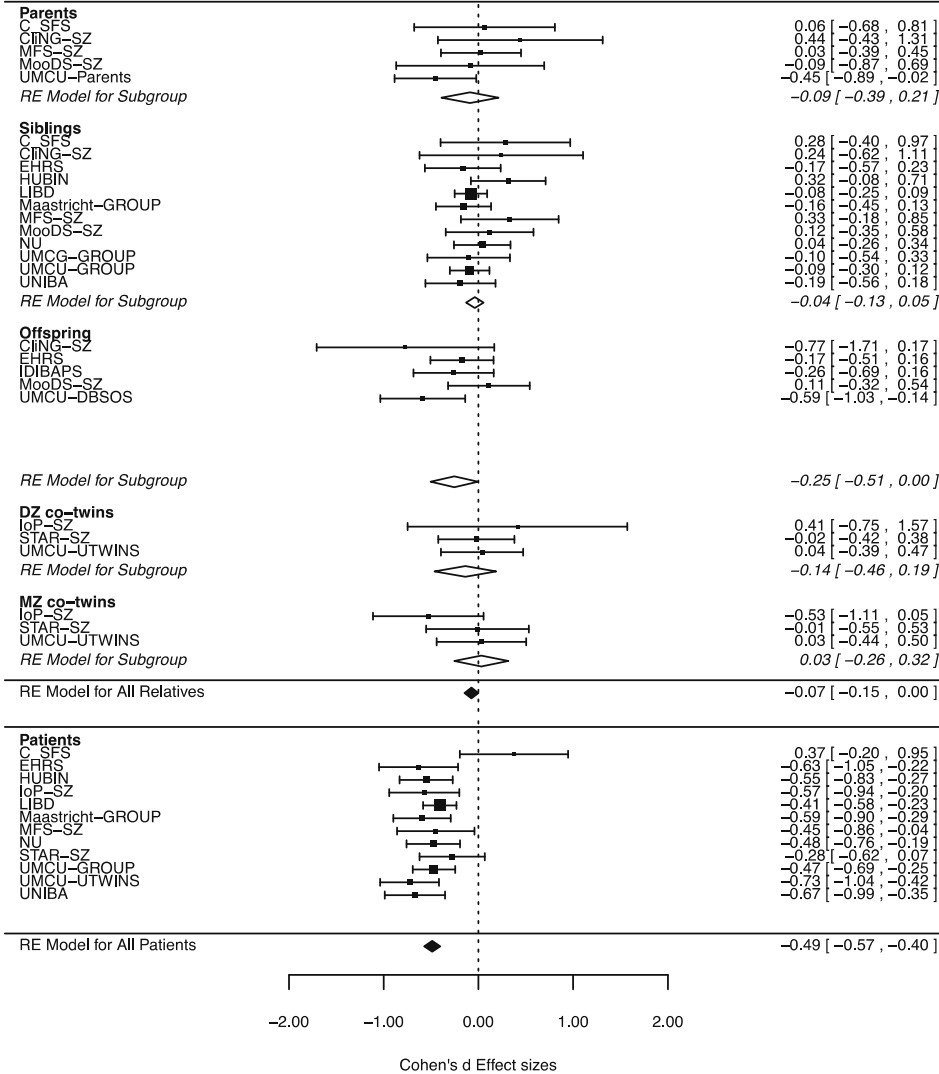

## Bipolar disorder

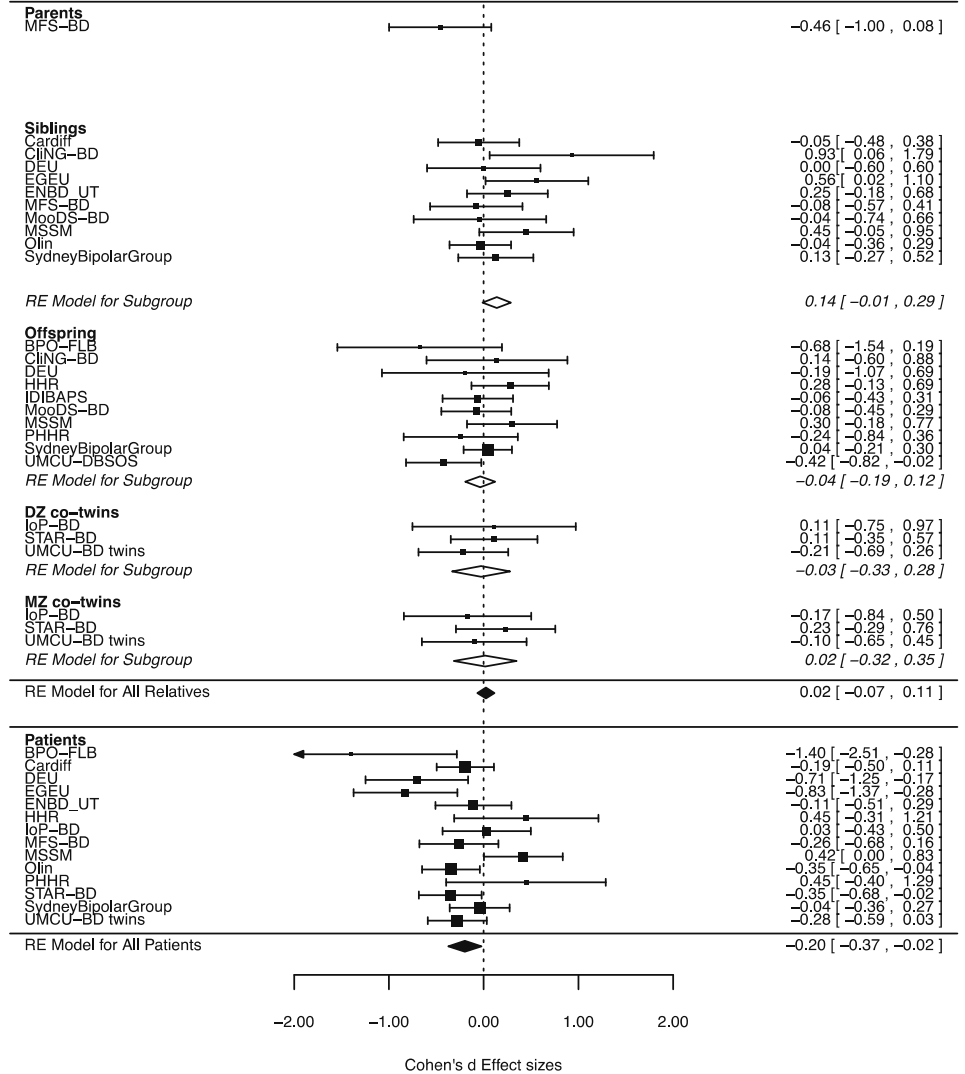

# amygdala

## Schizophrenia

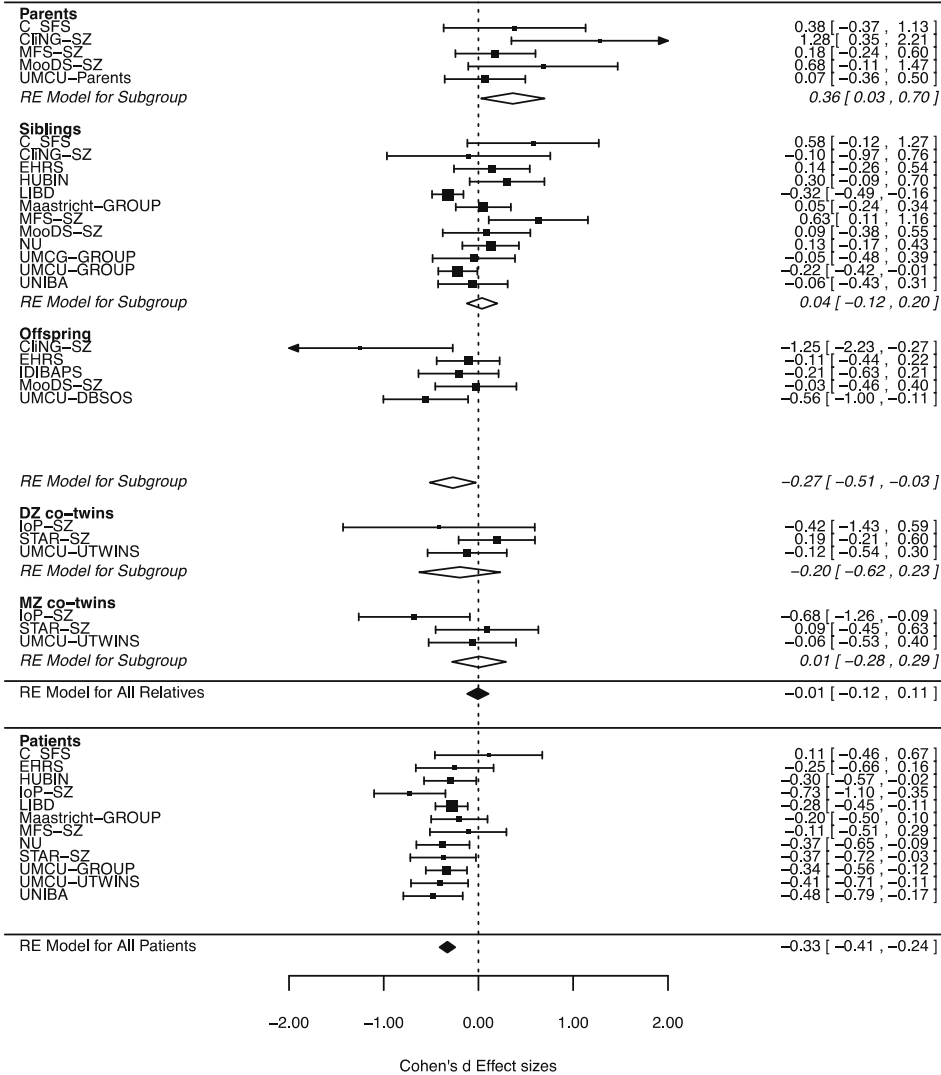

## Bipolar disorder

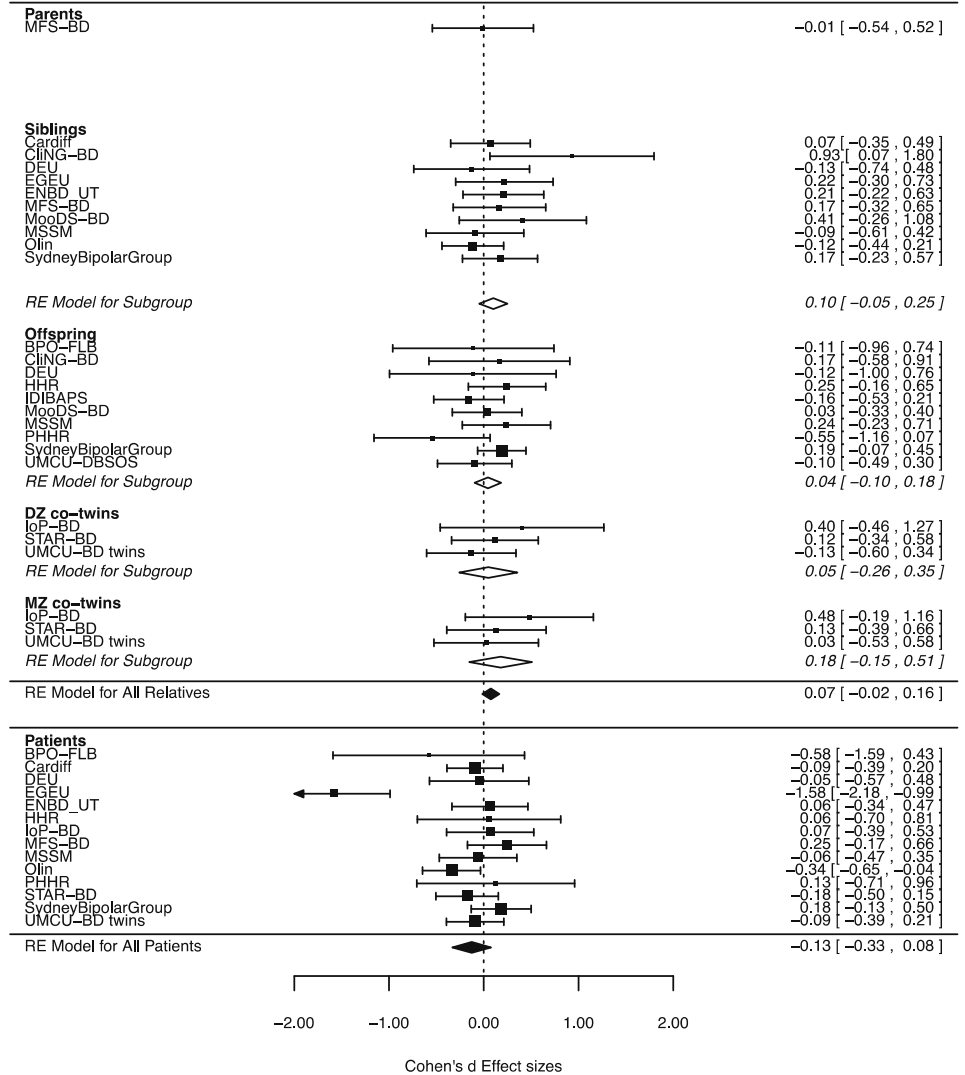

# accumbens

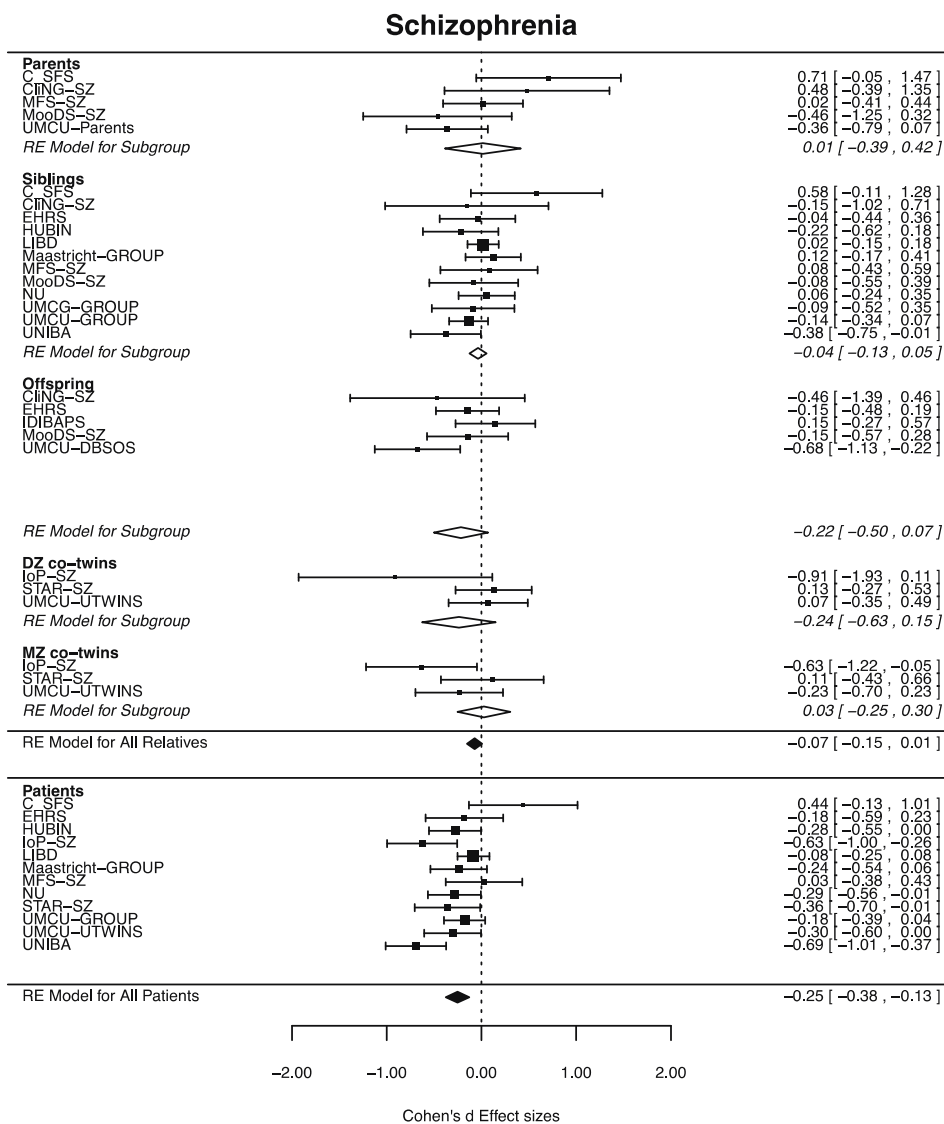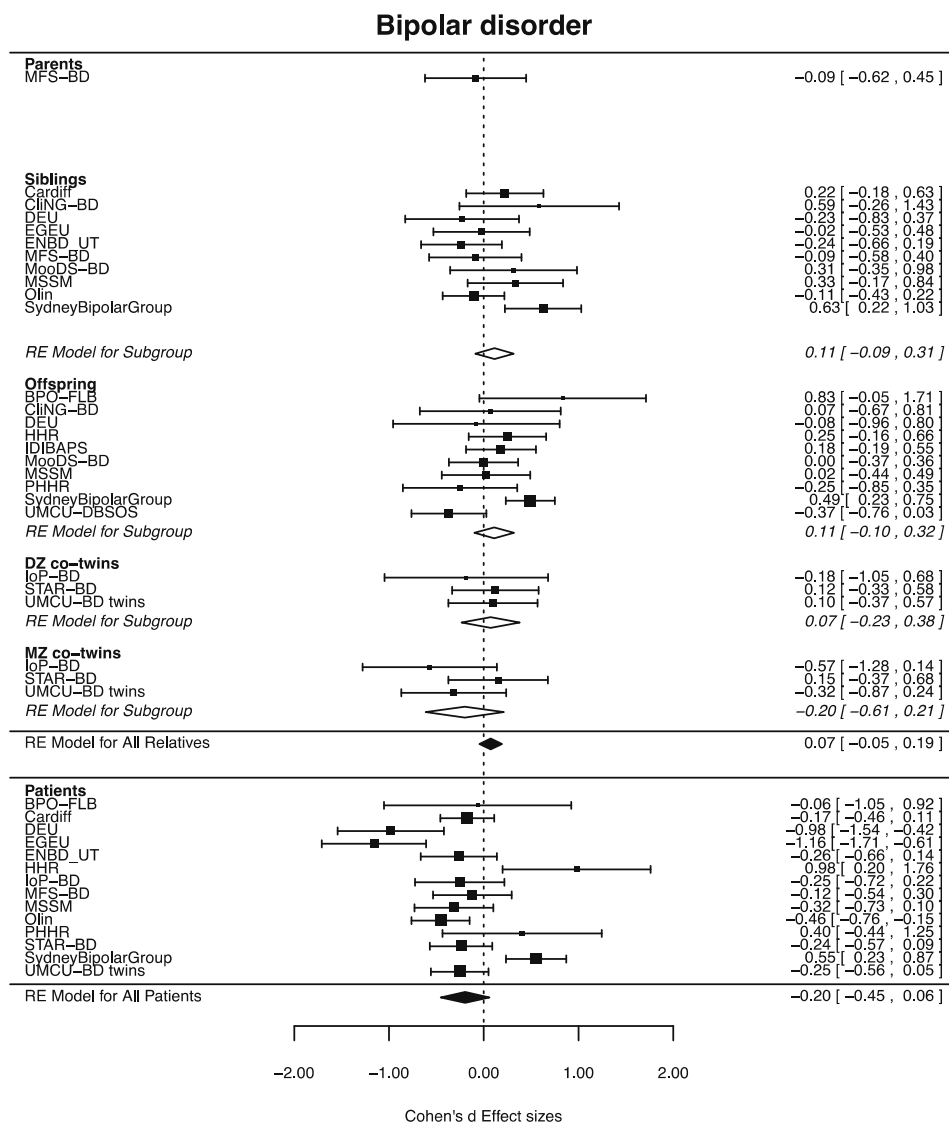

Supplementary Figure S2i-xvii. Meta-regression plots per region of interest

# meta-regression *ICV*

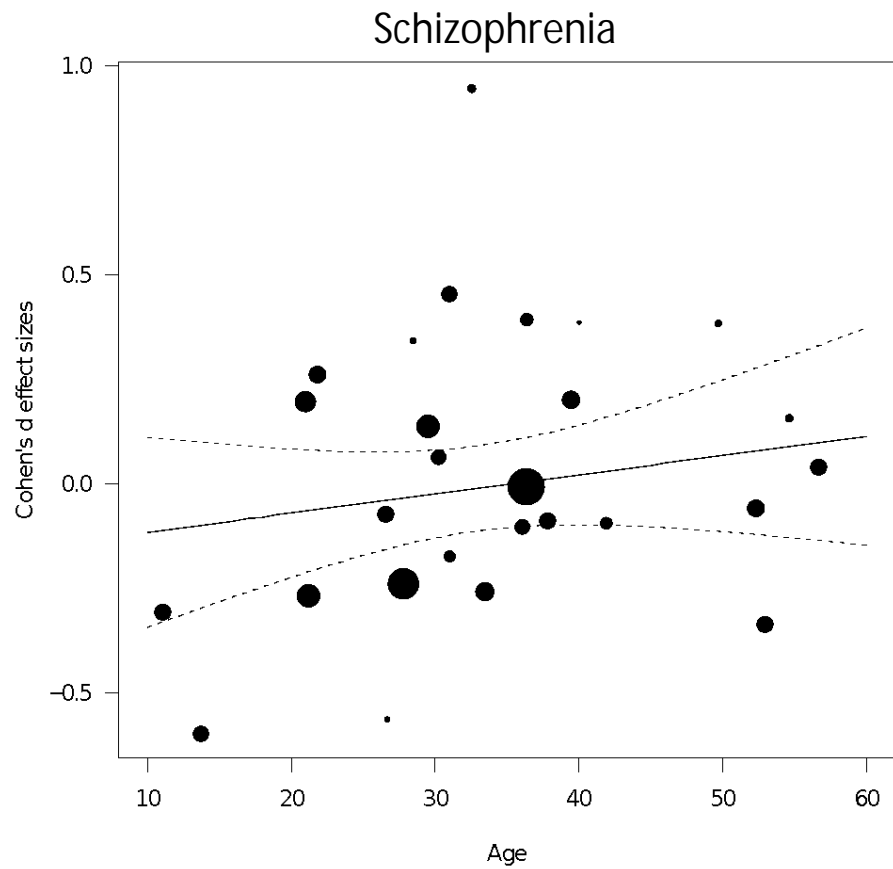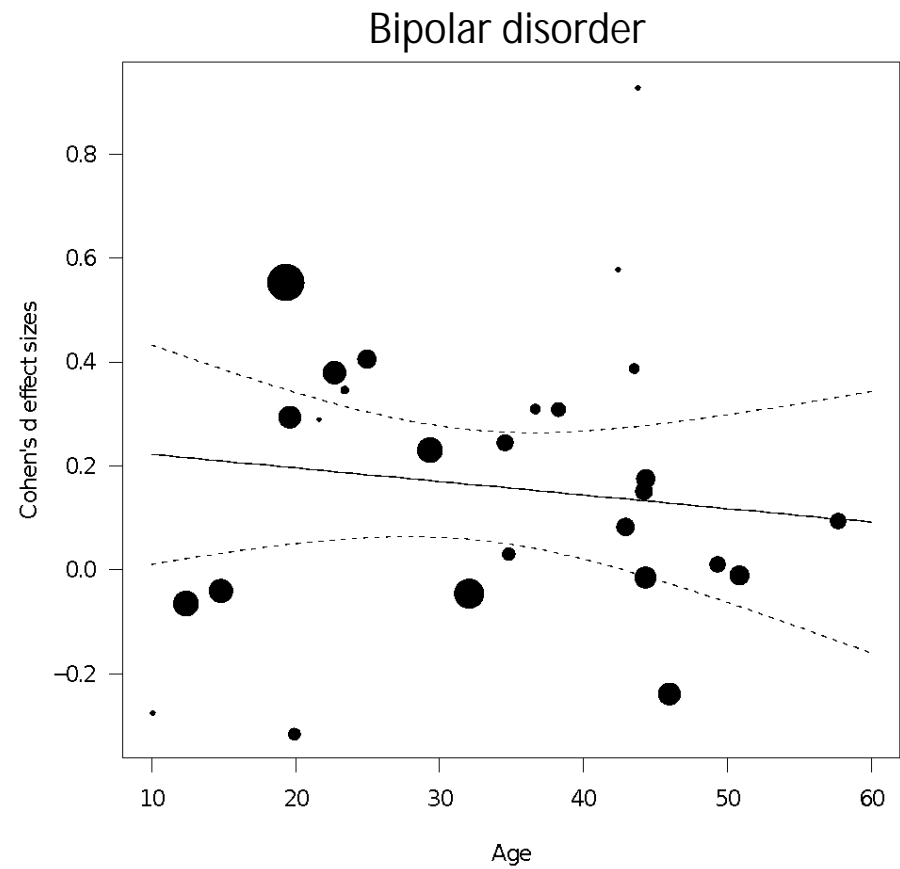

# meta-regression *total brain*

## Schizophrenia

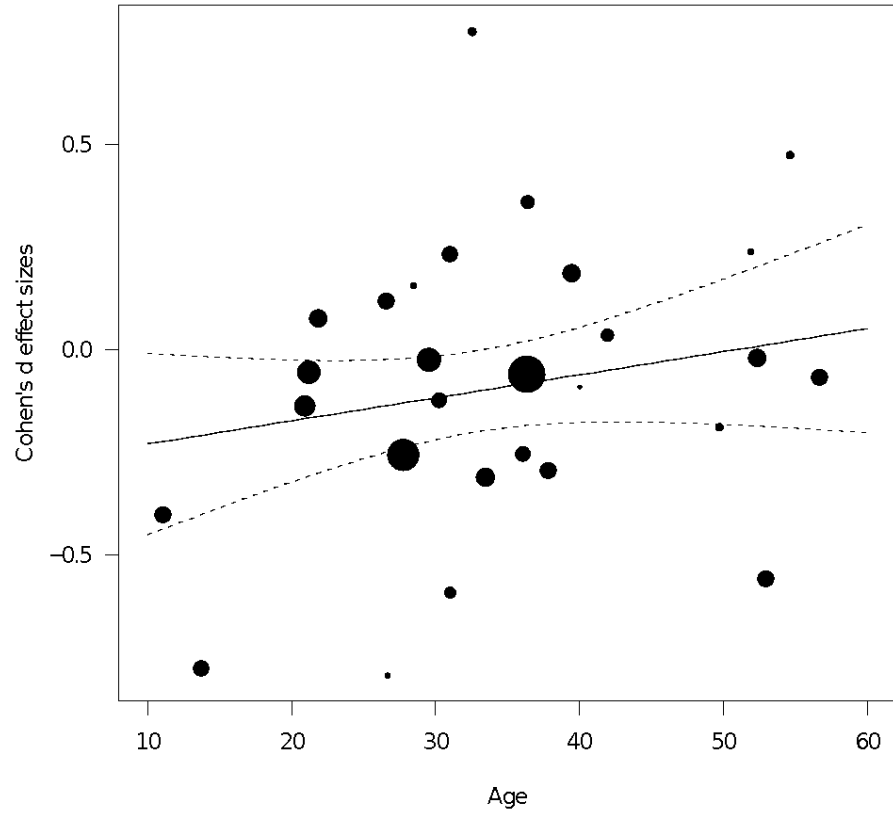

## Bipolar disorder

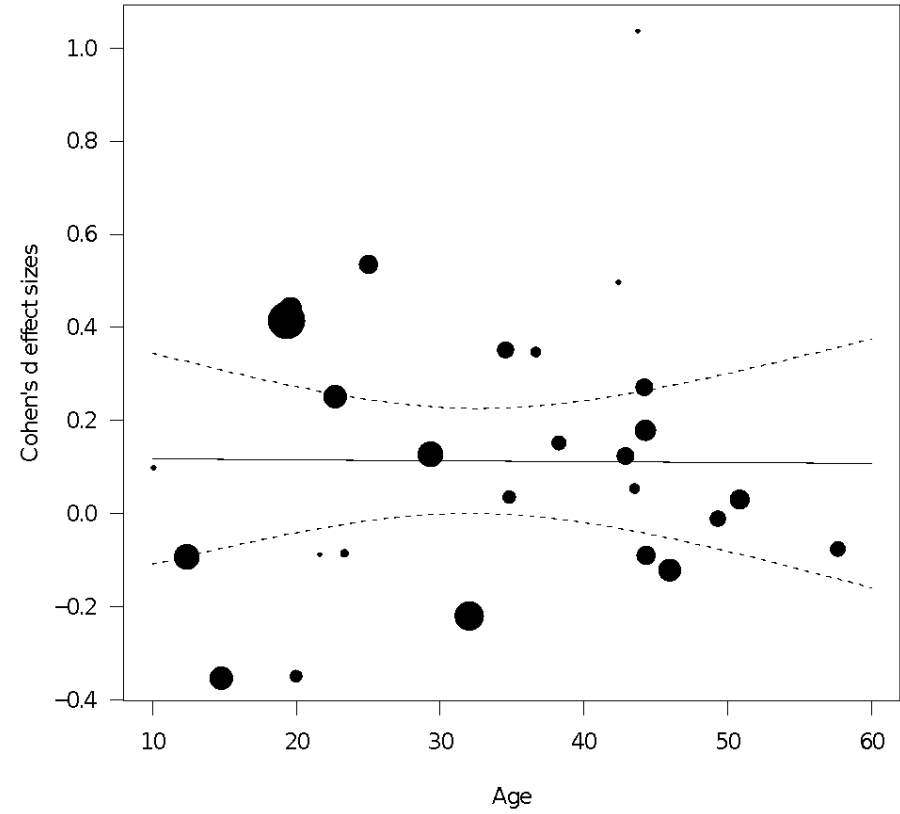



# meta-regression *cortical gray matter*

## Schizophrenia

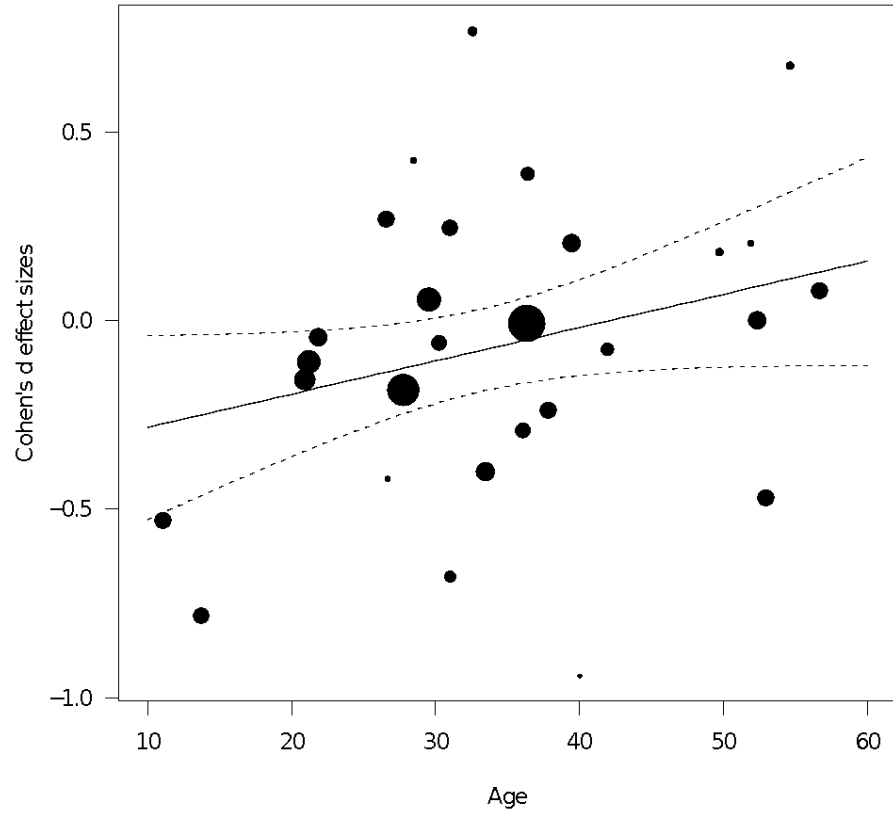

## Bipolar disorder

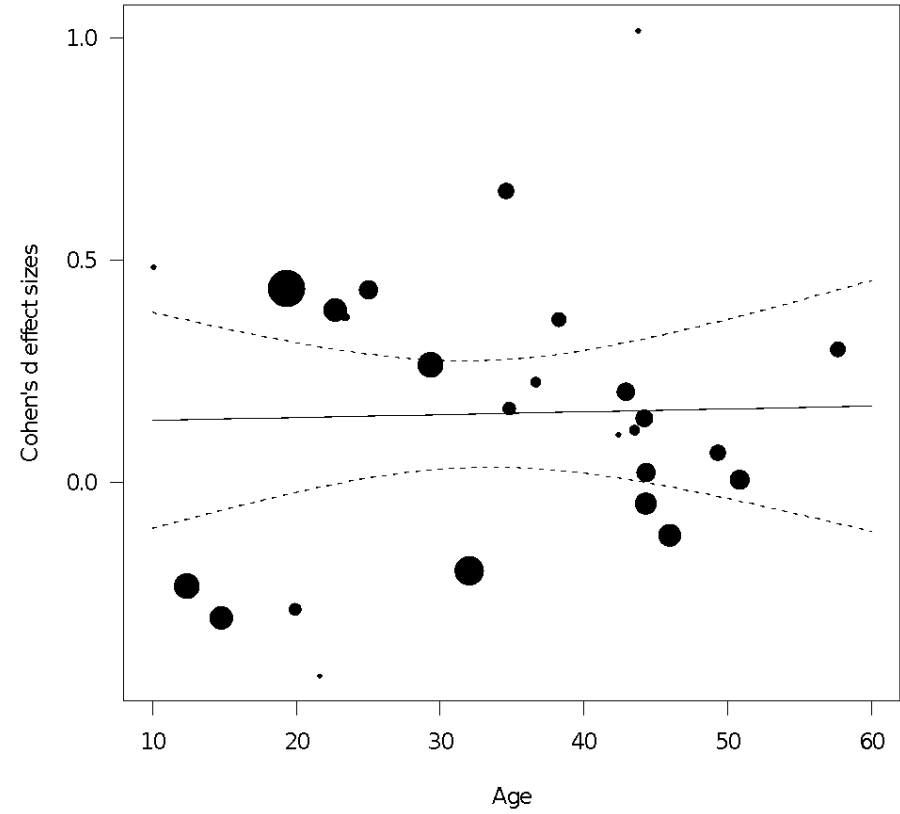

# meta-regression *cerebral white matter*

## Schizophrenia

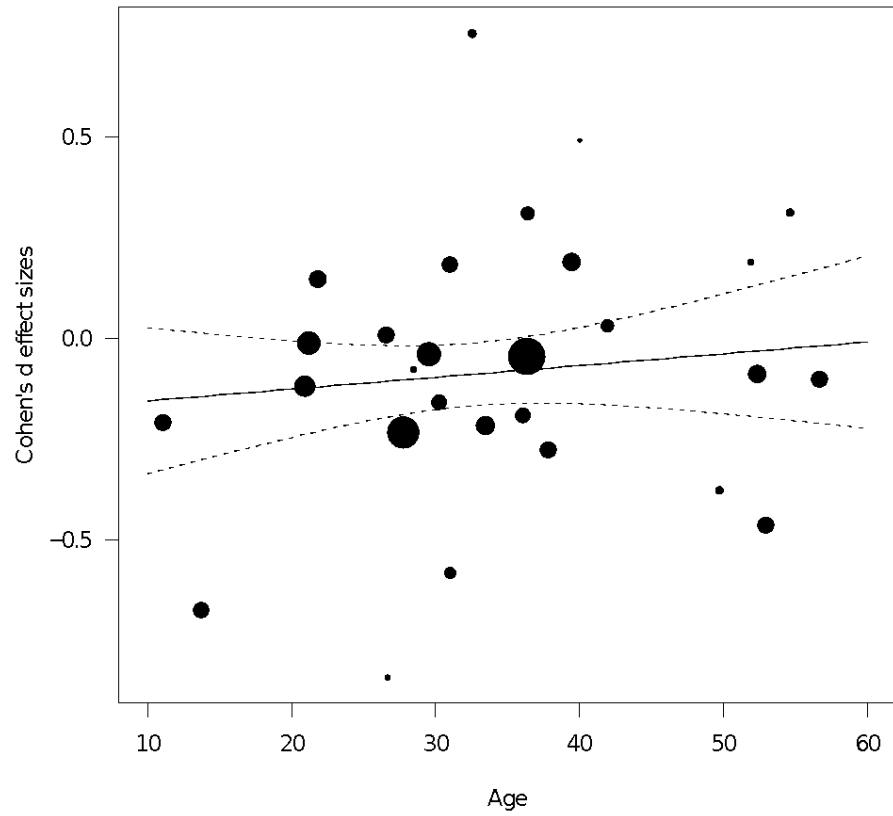

## Bipolar disorder

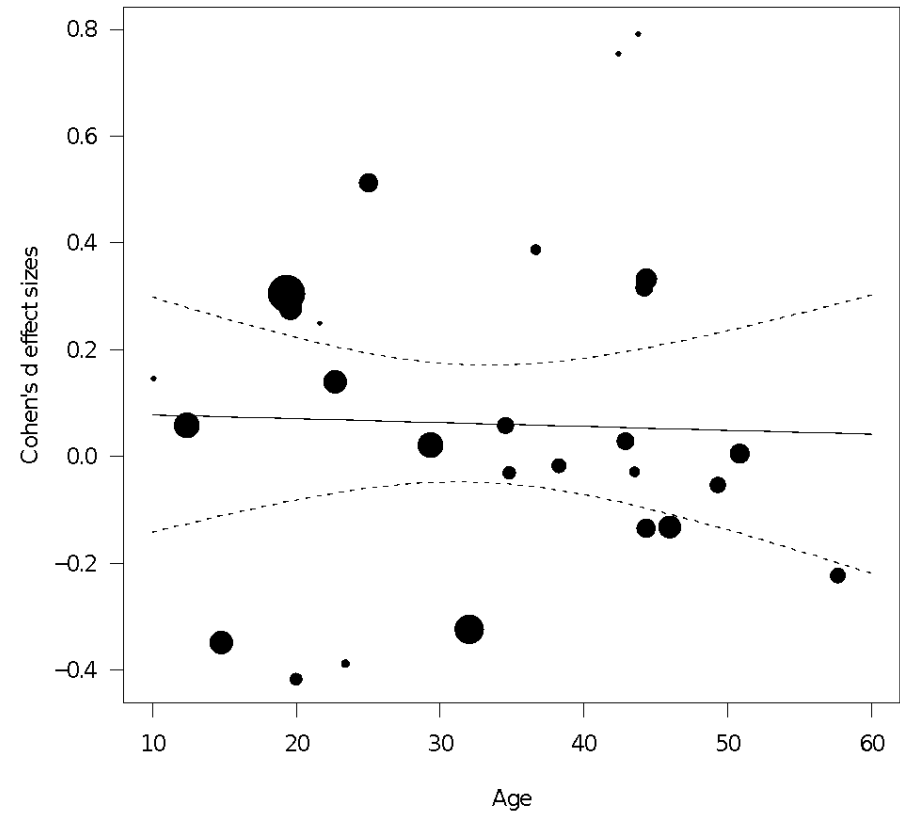

# meta-regression *cerebellum gray matter*

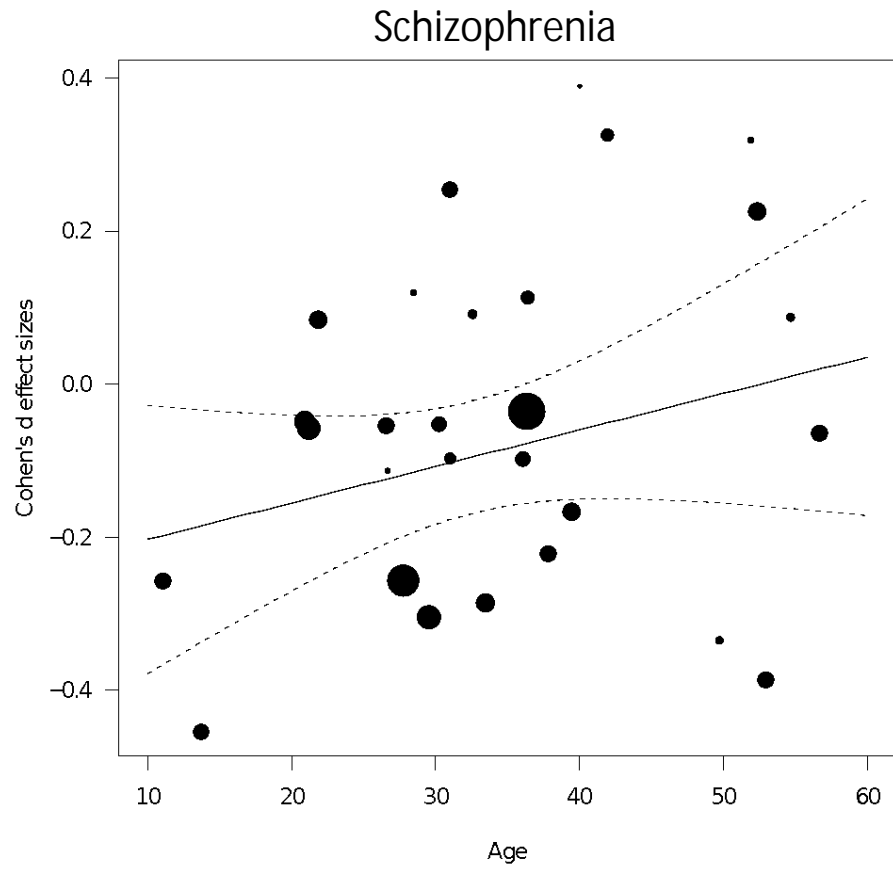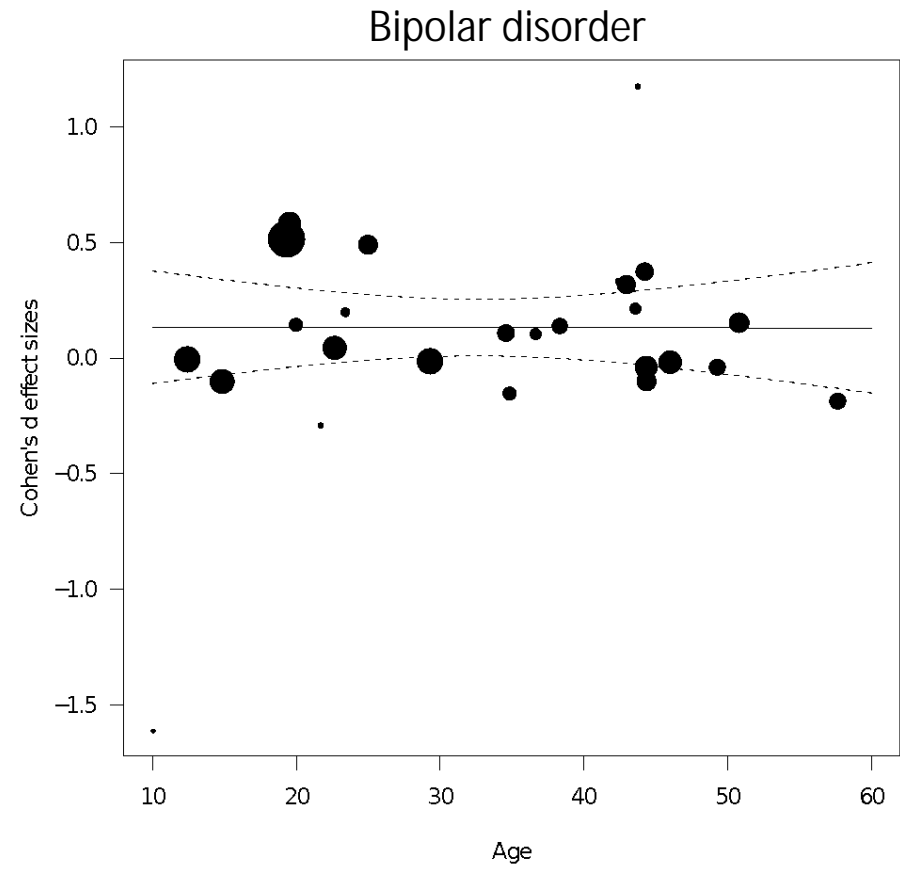

# meta-regression *cerebellum white matter*

## Schizophrenia

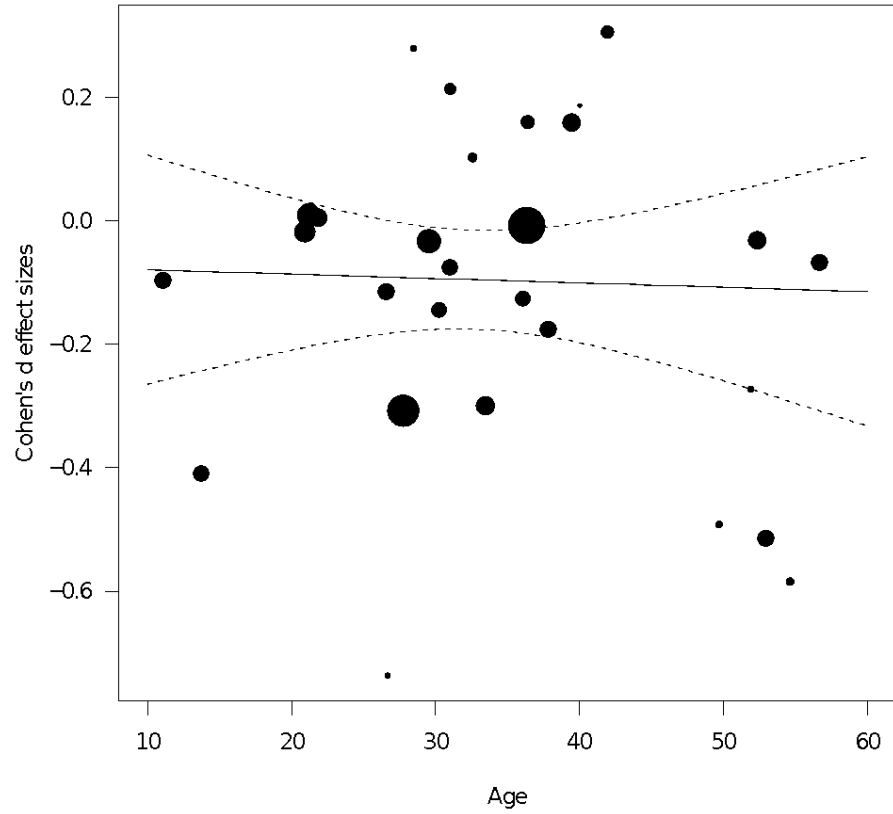

## Bipolar disorder

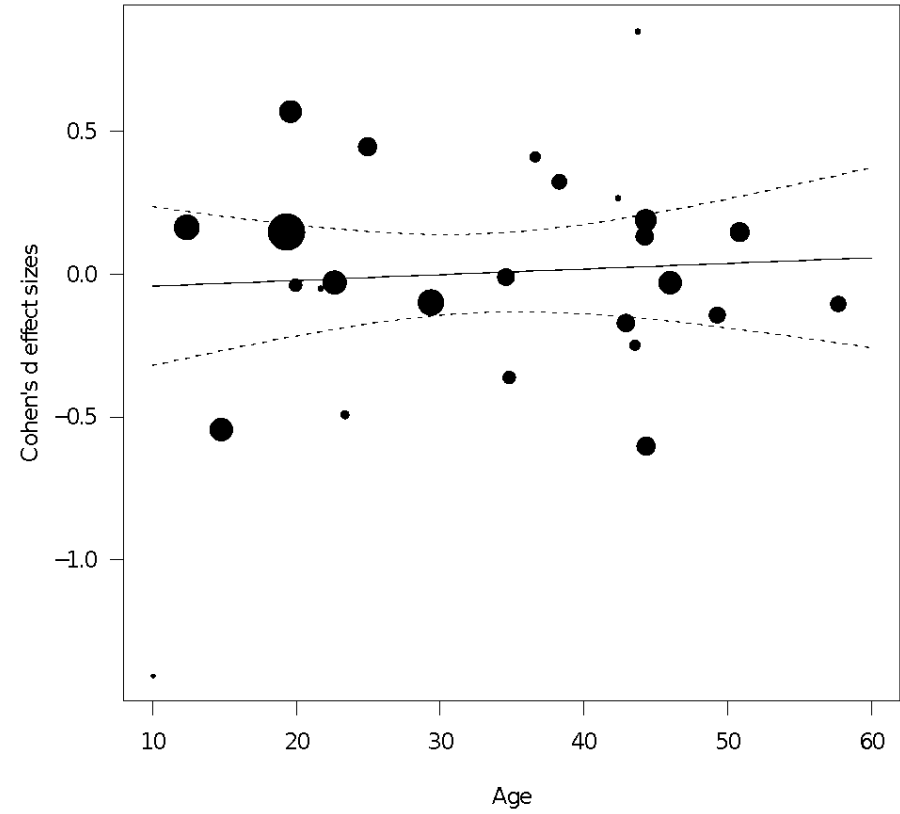

# meta-regression *lateral ventricles*

## Schizophrenia

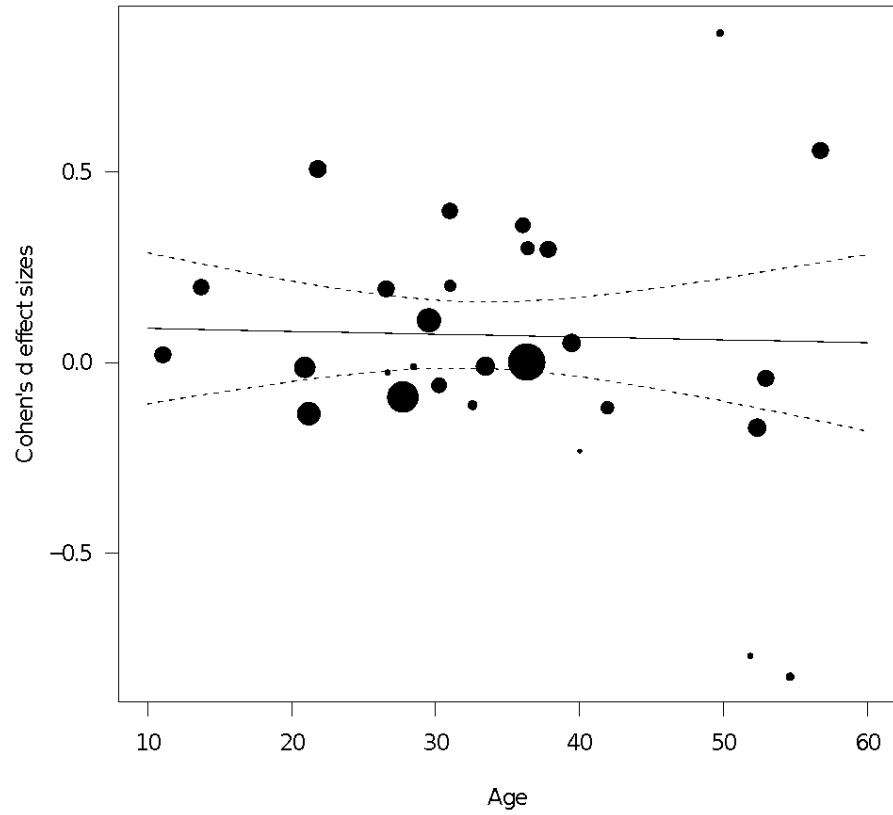

## Bipolar disorder

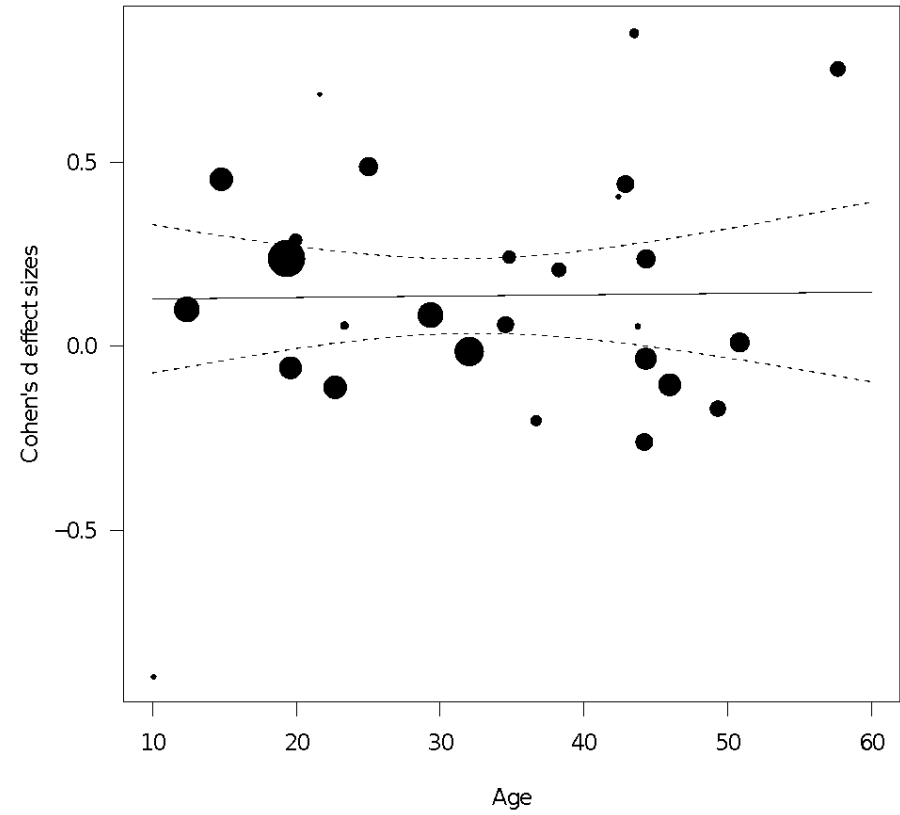

# meta-regression *third ventricle*

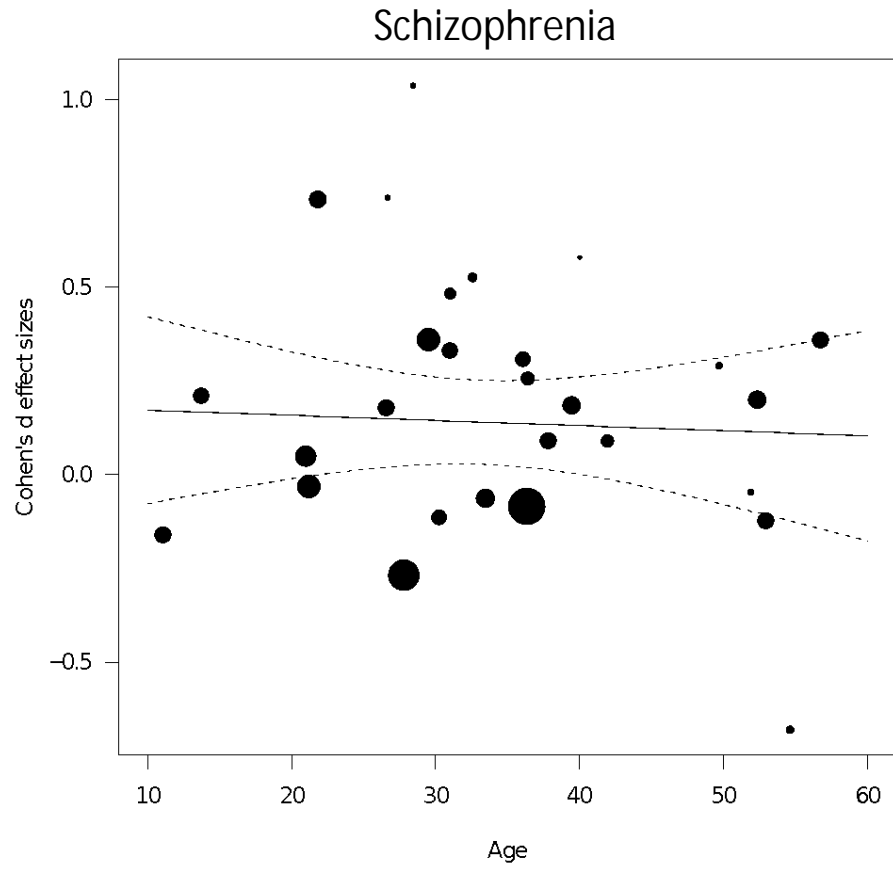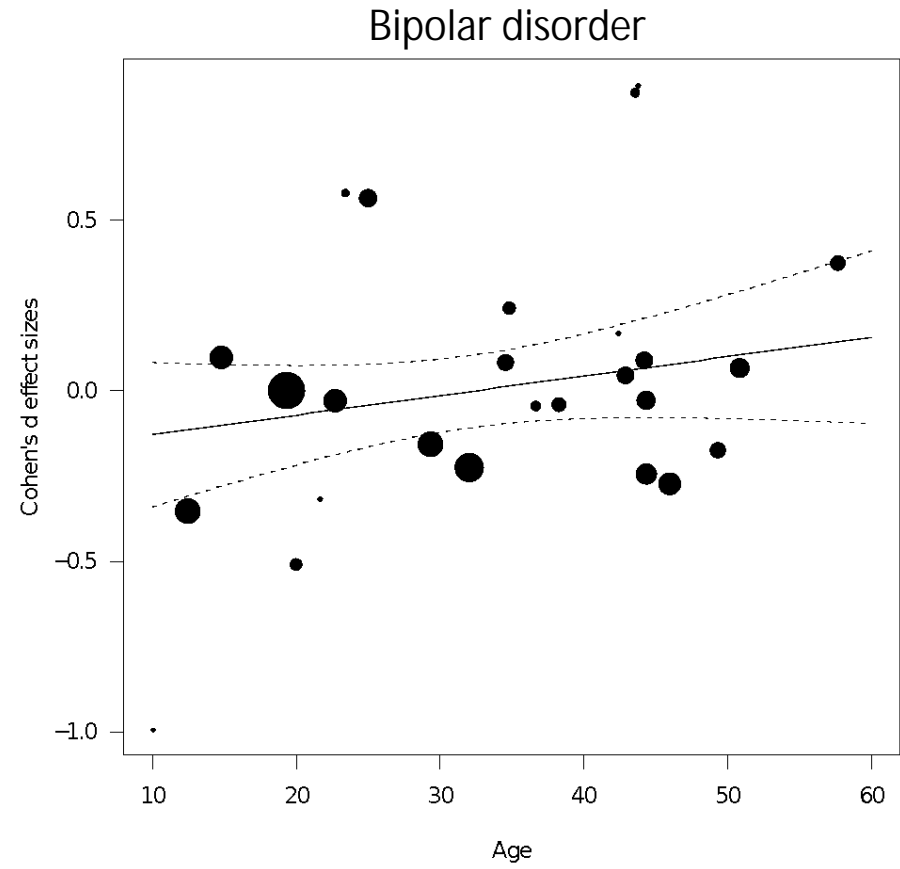

# meta-regression *surface area*

## Schizophrenia

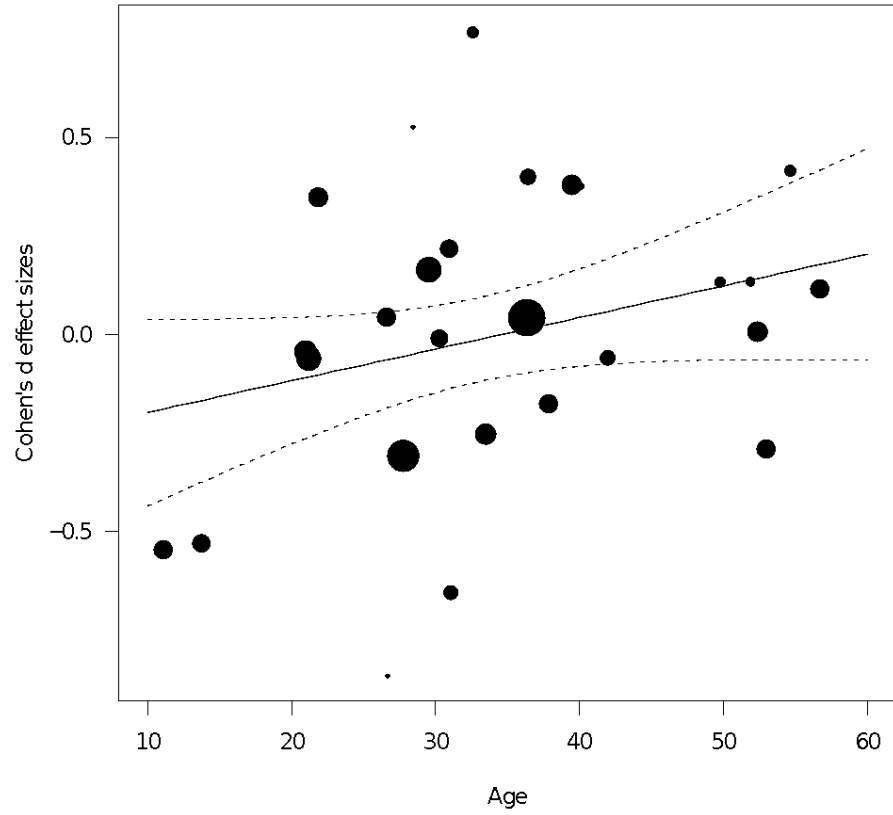

## Bipolar disorder

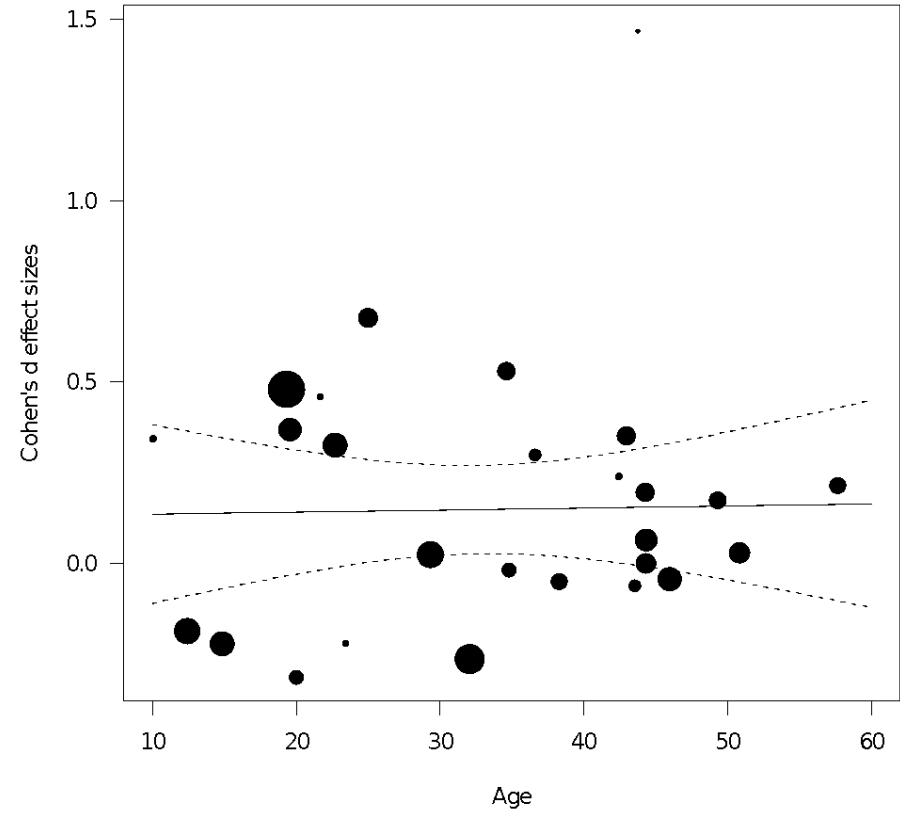

# meta-regression *cortical thickness*

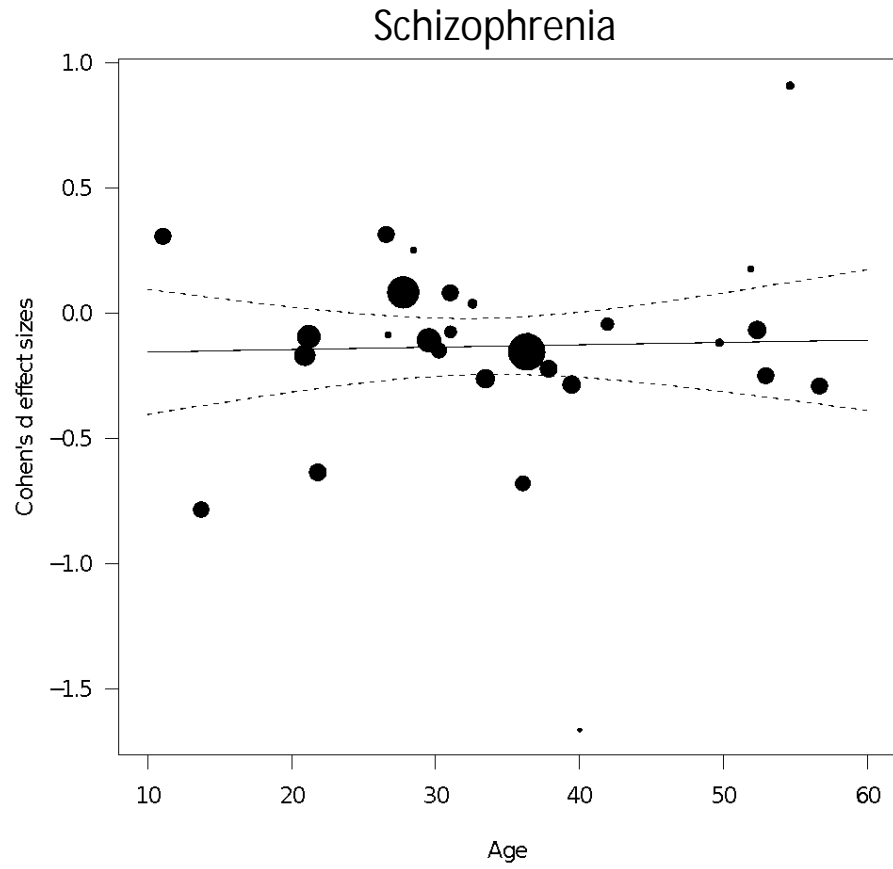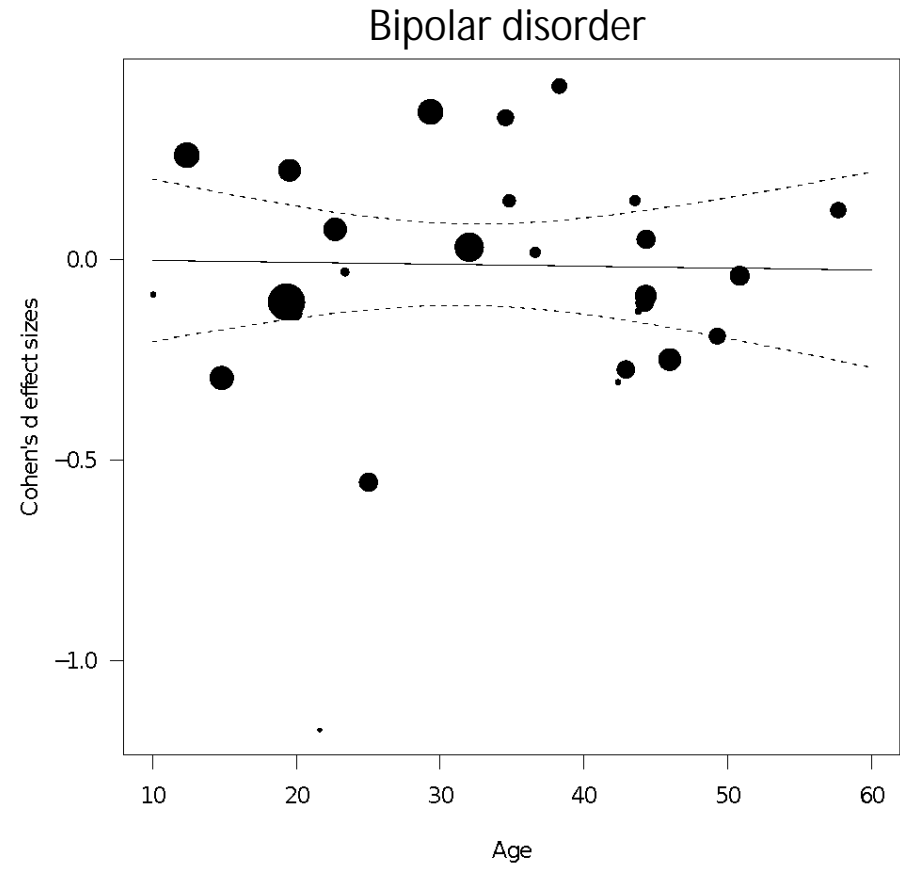



# meta-regression *thalamus*

## Schizophrenia

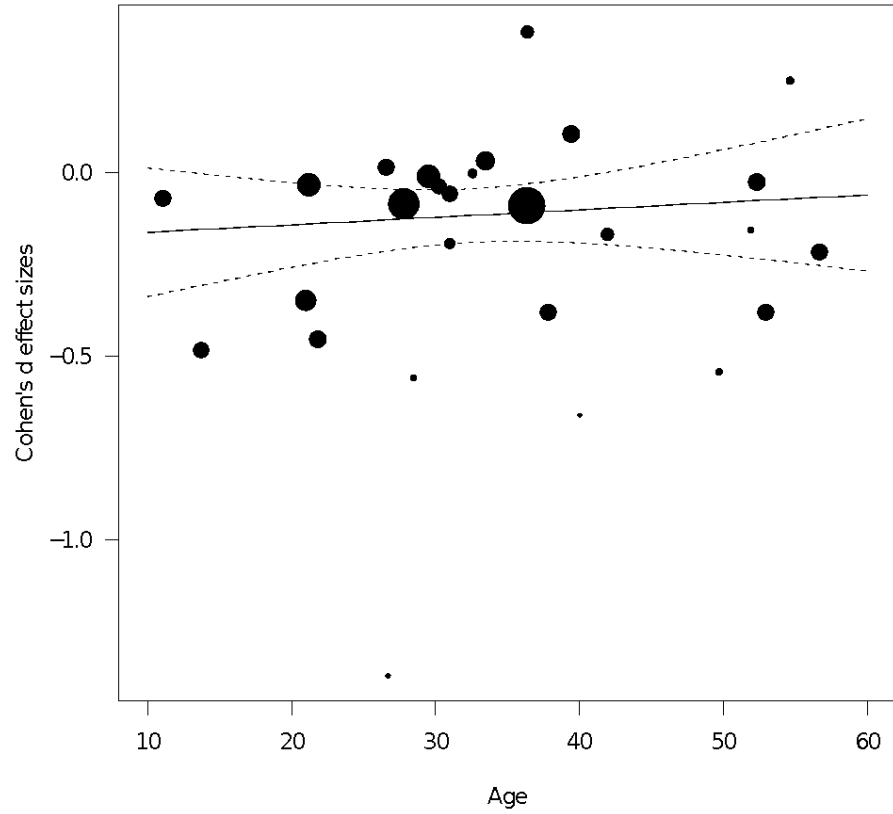

## Bipolar disorder

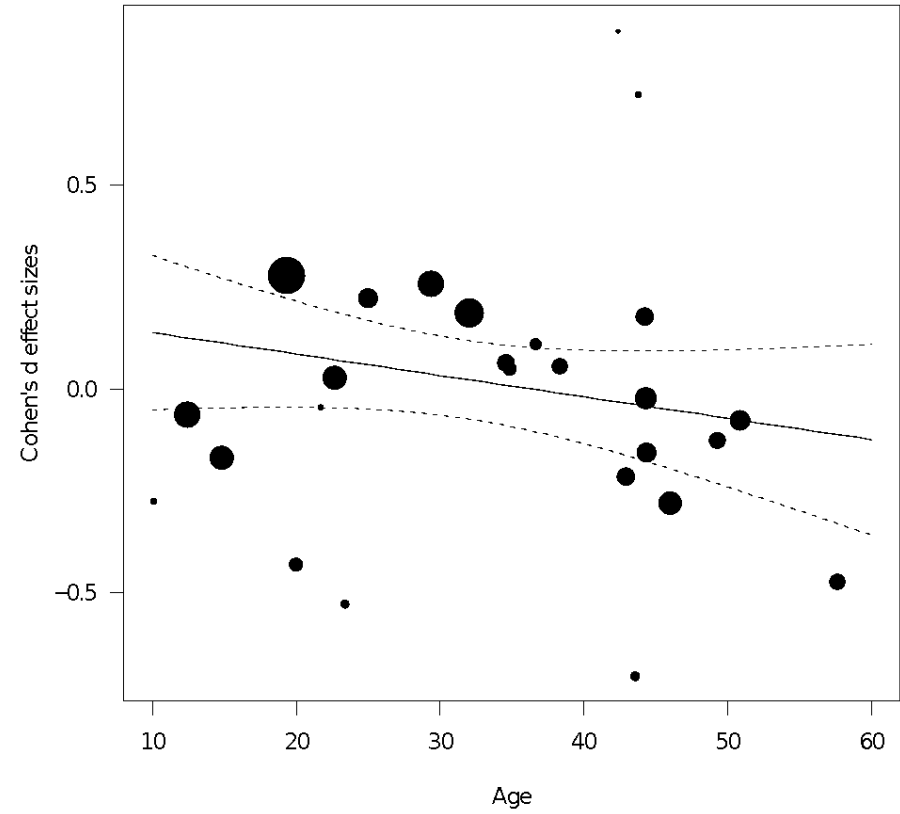

# meta-regression *caudate*

## Schizophrenia

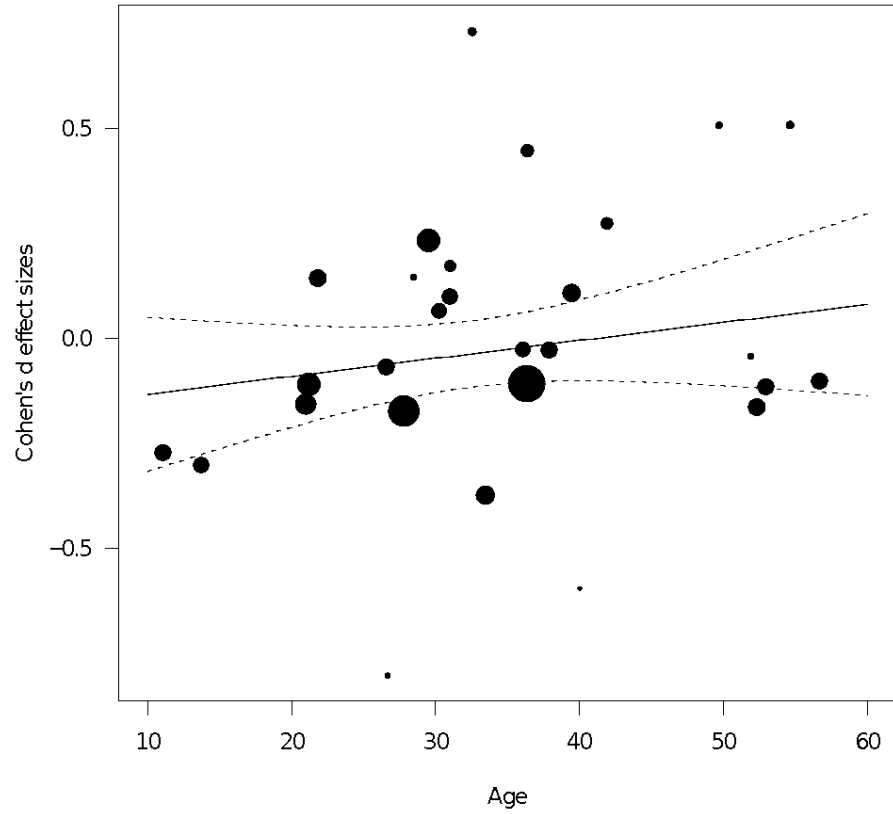

## Bipolar disorder

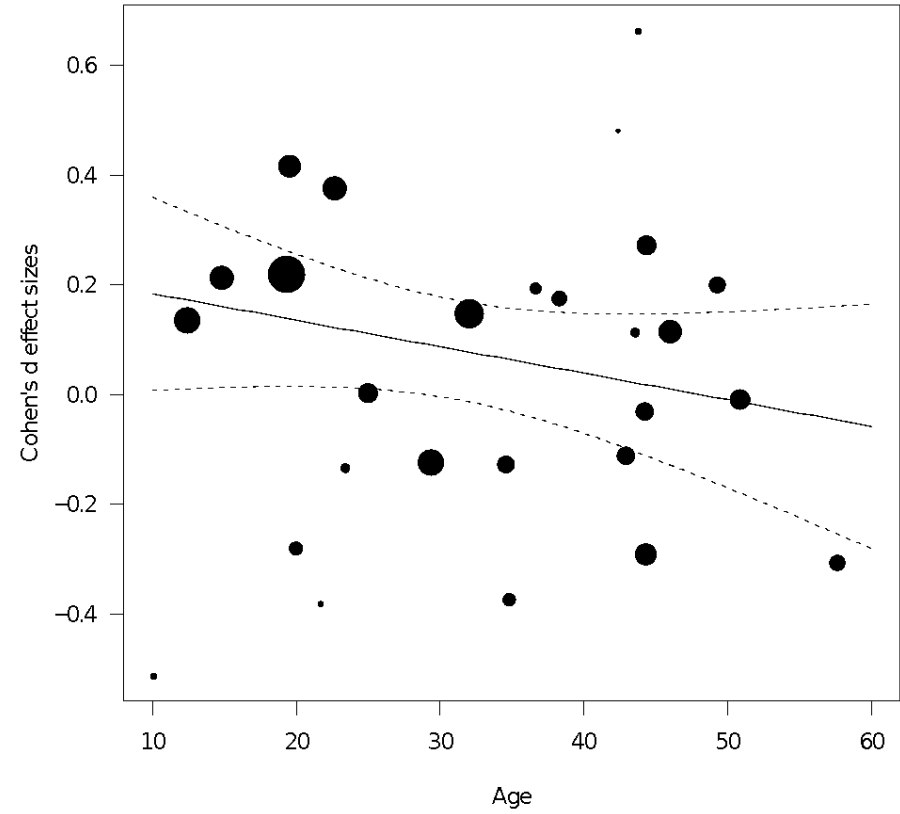

# meta-regression *putamen*

## Schizophrenia

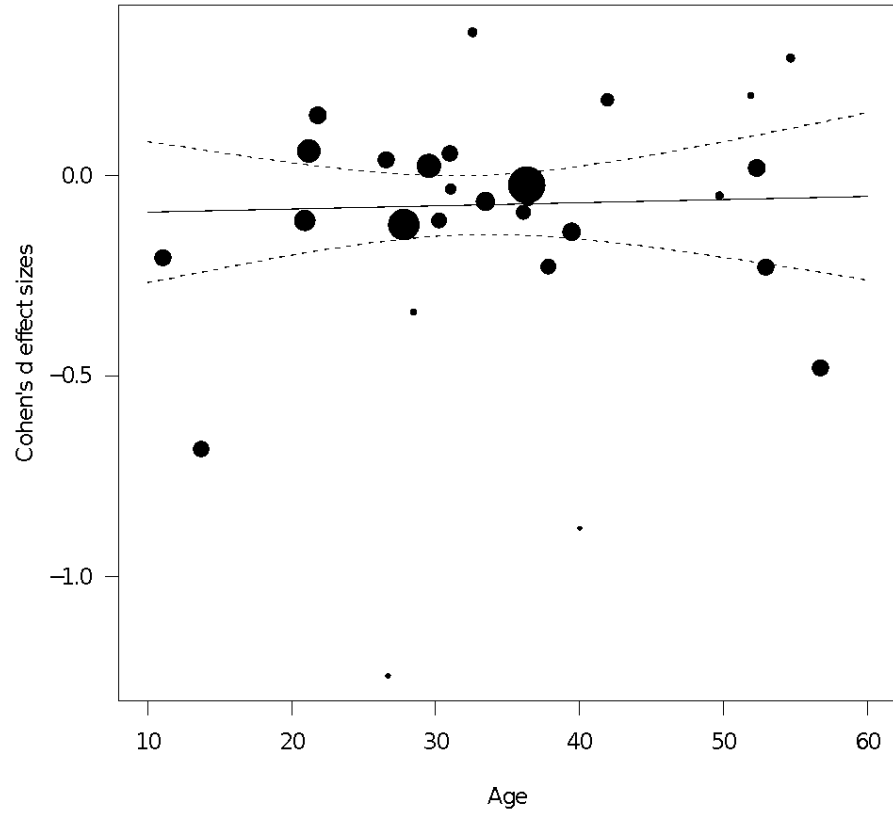

## Bipolar disorder

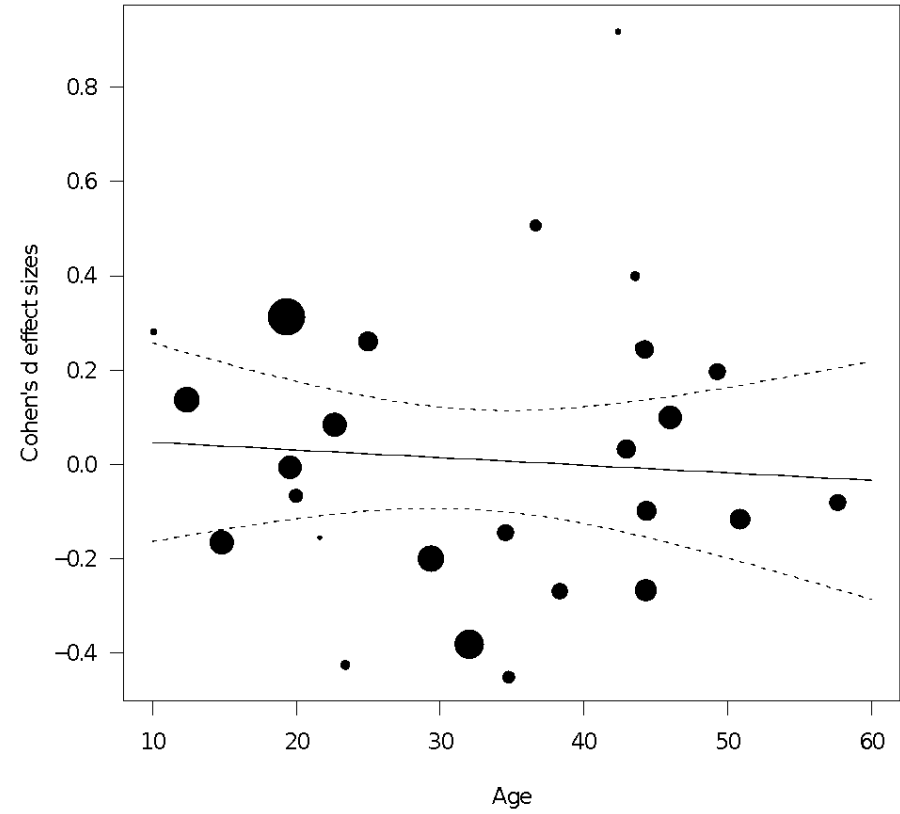

# meta-regression *pallidum*

## Schizophrenia

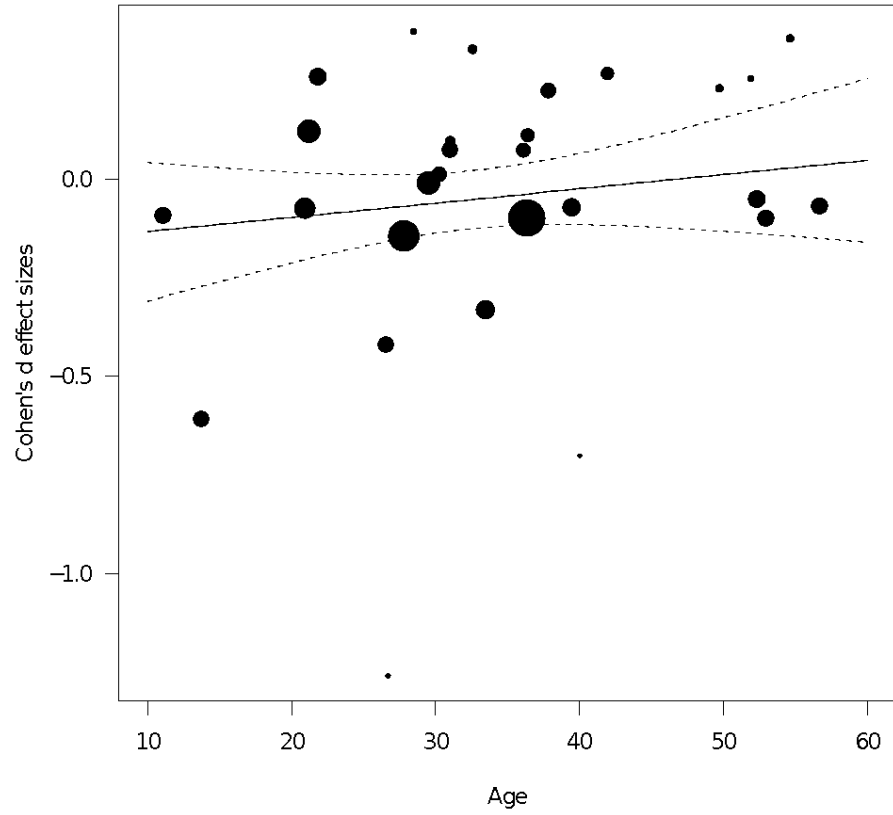

## Bipolar disorder

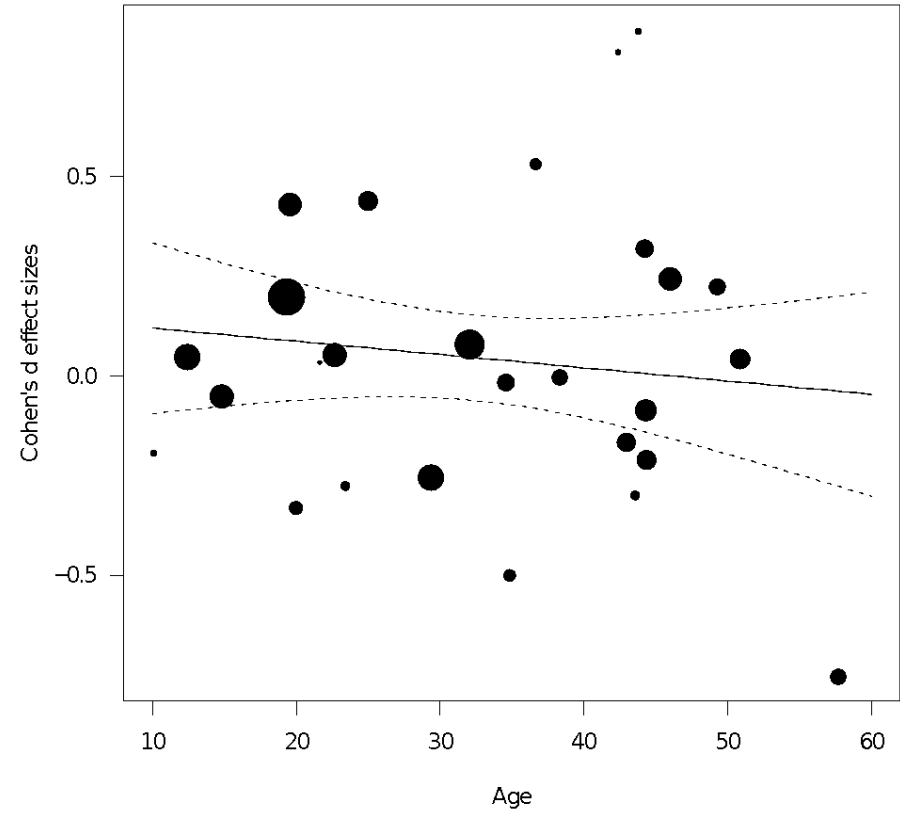

# meta-regression *hippocampus*

## Schizophrenia

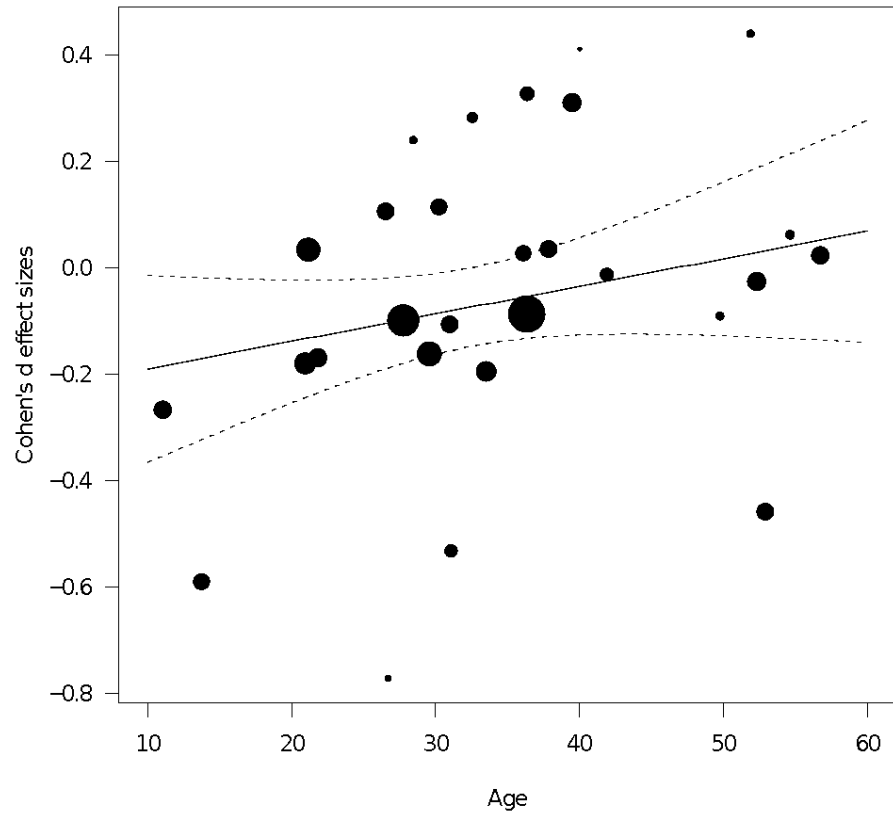

## Bipolar disorder

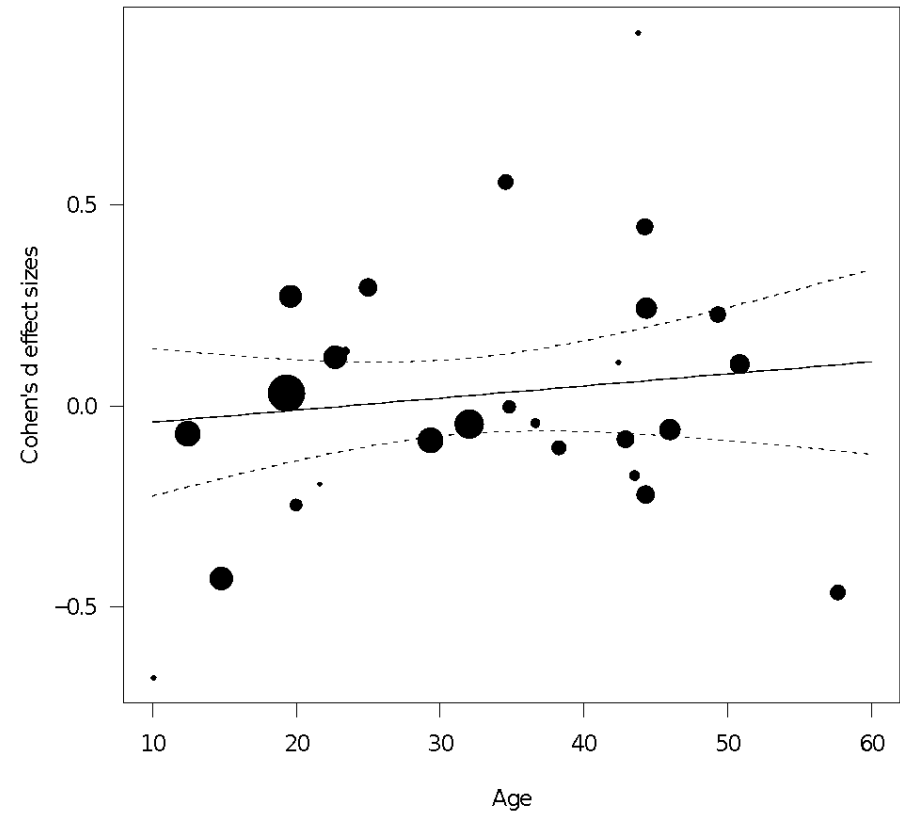

# meta-regression *amygdala*

## Schizophrenia

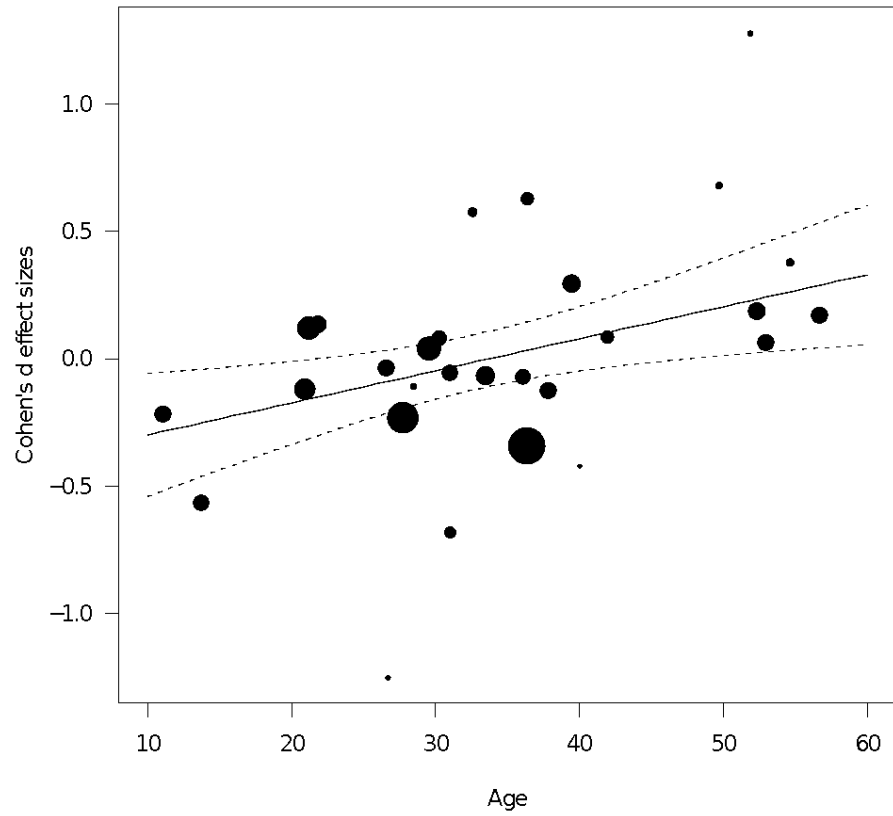

## Bipolar disorder

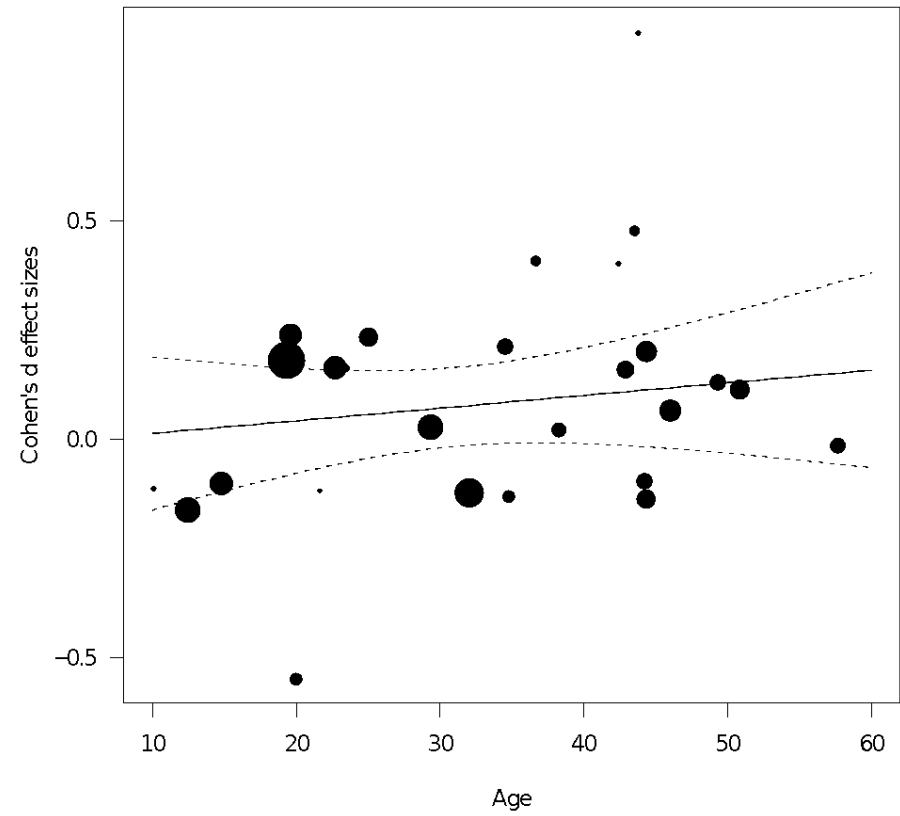

# meta-regression *accumbens*

## Schizophrenia

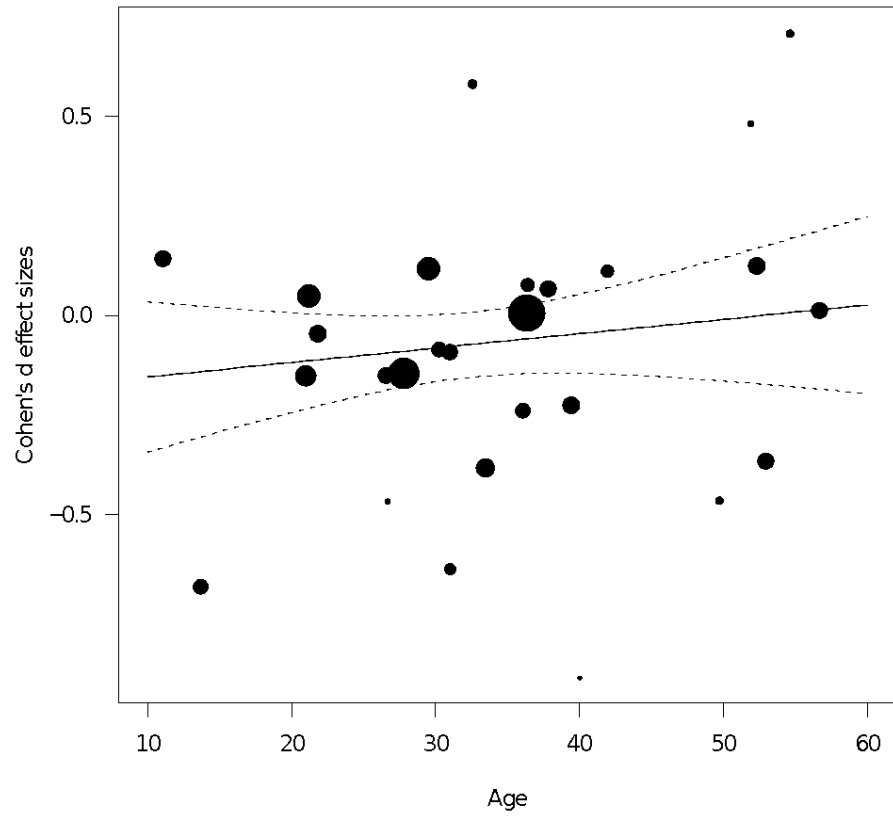

## Bipolar disorder

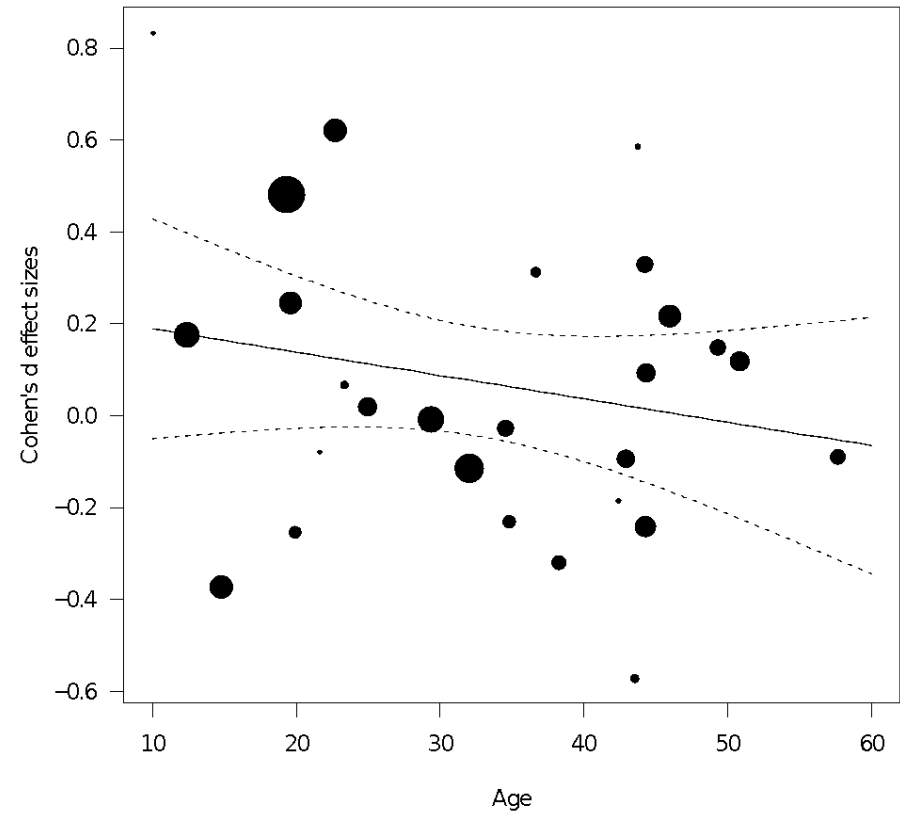

## Supplementary Methods

To compare the effect sizes between bipolar disorder and schizophrenia and between the different types of first-degree relatives, the following approach was applied;

If  $d$  is the observed Cohen's  $d$  value, then the sampling variance of  $d$  is approximately equal to:

$$v = \frac{1}{n_1} + \frac{1}{n_2} + \frac{d^2}{2(n_1 + n_2)}$$

With  $d$  the effect size as analyzed, and  $n_1$  and  $n_2$  the two corresponding sample sizes.

To test the null hypothesis  $H_0: \delta_1 = \delta_2$  (where  $\delta_1$  and  $\delta_2$  denote the true  $d$  values of the two effect sizes), we can compute a Z-score:

$$z = \frac{d_1 - d_2}{\sqrt{n_1 + n_2}}$$

Which follows approximately a standard normal distribution under  $H_0$ .

If  $|z| \geq 1.96$ ,  $H_0$  can be rejected at  $\alpha = 0.05$  (two-sided).



## Supplementary Results

### FDRs subtype analyses

#### **Bipolar disorder**

FDRs-BD parents were not included in these analyses as only one cohort included parents. None of the effect sizes was significant after correction for multiple comparisons (please see **Table S7a** and **Figure S1i-xvii** for all nominally significant effect sizes).

*Correction for intracranial volume:* After correction for ICV, hippocampal volume was significantly smaller in offspring than in siblings and thalamus volume was smaller in monozygotic co-twins compared to dizygotic co-twins ( $q < 0.05$  corrected; **Table S8a**).

#### **Schizophrenia**

The largest effects, when comparing the FDRs-SZ subtypes to controls, were reported in the offspring, but none of the effect sizes was significant after correction for multiple comparisons (see **Table S7b** and **Figure S1i-xvii** for all nominally significant effect sizes). Direct comparison between relatives showed differences between offspring and siblings, i.e., offspring had significantly smaller ICV, surface area, total brain, cortical gray matter, cerebral white matter, thalamus, caudate, putamen, pallidum, hippocampus, and amygdala volumes than siblings ( $q < 0.05$  corrected; **Table S7b**). In addition, parents had larger amygdala volumes than monozygotic co-twins and offspring; dizygotic co-twins had a thinner cortex than siblings and parents; and offspring had smaller pallidum and cortical gray matter volume than parents ( $q < 0.05$  corrected; **Table S7b**).

*Correction for intracranial volume:* When controlling for ICV, again, none of the effect sizes comparing FDRs-SZ subtypes with controls was significant after correction for multiple comparisons (please see **Table S8b** for all nominally significant effect sizes). Direct comparison of relative types showed thinner cortex and smaller cortical gray matter in dizygotic co-twins compared to siblings and parents; larger amygdala volume in parents than reported in monozygotic co-twins, offspring and siblings; and smaller cerebellar white matter in parents than monozygotic co-twins ( $q < 0.05$  corrected, **Table S8b**).

## Supplementary References

1. Sheehan DV, Lecrubier Y, Sheehan KH, Amorim P, Janavs J, Weiller E, *et al.* (1998): The Mini-International Neuropsychiatric Interview (M.I.N.I.): the development and validation of a structured diagnostic psychiatric interview for DSM-IV and ICD-10. *J Clin Psychiatry* 59 Suppl 20: 22–33.
2. Duffy A, Alda M, Kutcher S, Cavazzoni P, Robertson C, Grof E, Grof P (2002): A prospective study of the offspring of bipolar parents responsive and nonresponsive to lithium treatment. *J Clin Psychiatry* 63: 1171–1178.
3. Lopez de Lara C, Jaitovich-Groisman I, Cruceanu C, Mamdani F, Lebel V, Yerko V, *et al.* (2010): Implication of synapse-related genes in bipolar disorder by linkage and gene expression analyses. *Int J Neuropsychopharmacol* 13: 1397–1410.
4. Hajek T, Cooke C, Kopecek M, Novak T, Hoschl C, Alda M (2015): Using structural MRI to identify individuals at genetic risk for bipolar disorders: a 2-cohort, machine learning study. *J Psychiatry Neurosci* 40: 316–324.
5. Jönsson EG, Edman-Ahlbom B, Sillén A, Gunnar A, Kulle B, Frigessi A, *et al.* (2006): Brain-derived neurotrophic factor gene (BDNF) variants and schizophrenia: an association study. *Prog Neuropsychopharmacol Biol Psychiatry* 30: 924–933.
6. Laywer G, Nyman H, Agartz I, Arnborg S, Jönsson EG, Sedvall GC, Hall H (2006): Morphological correlates to cognitive dysfunction in schizophrenia as studied with Bayesian regression. *BMC Psychiatry* 6: 31
7. Nesvåg R, Lawyer G, Varnäs K, Fjell AM, Walhovd KB, Frigessi A, *et al.* (2008): Regional thinning of the cerebral cortex in schizophrenia: effects of diagnosis, age and antipsychotic medication. *Schizophr Res* 98: 16–28.
8. Sanchez-Gistau V, Romero S, Moreno D, de la Serna E, Baeza I, Sugranyes G, *et al.* (2015): Psychiatric disorders in child and adolescent offspring of patients with schizophrenia and bipolar disorder: A controlled study. *Schizophr Res* 168: 197–203.
9. Georgiades A, Rijdsdijk F, Kane F, Rebollo-Mesa I, Kalidindi S, Schultze KK, *et al.* (2016): New insights into the endophenotypic status of cognition in bipolar disorder: genetic modelling study of twins and siblings. *Br J Psychiatry* 208: 539–547.
10. Sugihara G, Kane F, Picchioni MM, Chaddock CA, Kravariti E, Kalidindi S, *et al.* (2017): Effects of risk for bipolar disorder on brain function: A twin and family study. *Eur Neuropsychopharmacol* 27: 494–503.
11. Toulopoulou T, Picchioni M, Rijdsdijk F, Hua-Hall M, Ettinger U, Sham P, Murray (2007): Substantial genetic overlap between neurocognition and schizophrenia: genetic modeling in twin samples. *Arch Gen Psychiatry* 64: 1348–1355.

12. Ettinger U, Picchioni M, Landau S, Matsumoto K, van Haren NE, Marshall N, *et al.* (2007): Magnetic resonance imaging of the thalamus and adhesio interthalamica in twins with schizophrenia. *Arch Gen Psychiatry* 64: 401–409.
13. Picchioni MM, Walshe M, Touloupoulou T, McDonald C, Taylor M, Waters-Metenier S, *et al.* (2010): Genetic modelling of childhood social development and personality in twins and siblings with schizophrenia. *Psychol Med* 40: 1305–1316.
14. Maxwell ME (1992): *Family Interview for Genetic Studies (FIGS): a manual for FIGS*. Clinical Neurogenetics Branch, Intramural Research Program, National Institute of Mental Health, Bethesda, Maryland
15. Andreasen NC, Flaum M, Arndt S (1992): The Comprehensive Assessment of Symptoms and History (CASH). An instrument for assessing diagnosis and psychopathology. *Arch Gen Psychiatry* 49: 615–623.
16. McDonald C, Grech A, Touloupoulou T, Schulze K, Chapple B, Sham P, *et al.* (2002): Brain volumes in familial and non-familial schizophrenic probands and their unaffected relatives. *Am J Med Genet* 114: 616–625.
17. McDonald C, Marshall N, Sham PC, Bullmore ET, Schulze K, Chapple B, *et al.* (2006): Regional brain morphometry in patients with schizophrenia or bipolar disorder and their unaffected relatives. *Am J Psychiatry* 163: 478–487.
18. Leckman JF, Sholomskas D, Thompson WD, Belanger A, Weissman MM (1982): Best estimate of lifetime psychiatric diagnosis: a methodological study. *Arch Gen Psychiatry* 39: 879–883.
19. Nurnberger JI Jr, McInnis M, Reich W, Kastelic E, Wilcox HC, Glowinski A, *et al.* (2011): A high-risk study of bipolar disorder. Childhood clinical phenotypes as precursors of major mood disorders. *Arch Gen Psychiatry* 68: 1012–1020.
20. Nurnberger JI Jr, Blehar MC, Kaufmann CA, York-Cooler C, Simpson SG, Harkavy-Friedman J, *et al.* (1994): Diagnostic interview for genetic studies. Rationale, unique features, and training. NIMH Genetics Initiative. *Arch Gen Psychiatry* 51: 849–859.
21. Korver N, Quee PJ, Boos HB, Simons CJ, de Haan L, GROUP investigators (2012): Genetic Risk and Outcome of Psychosis (GROUP), a multi-site longitudinal cohort study focused on gene-environment interaction: objectives, sample characteristics, recruitment and assessment methods. *Int J Methods Psychiatry Res* 21: 205–221.
22. Van der Meer L, Swart M, van der Velde J, Pijnenborg G, Wiersma D, Bruggeman R, Aleman A (2014): Neural correlates of emotion regulation in patients with schizophrenia and non-affected siblings. *PLoS One* 9: e99667.
23. Van der Schot AC, Vonk R, Brans RG, van Haren NE, Koolschijn PC, Nuboer V, *et al.* (2009): Influence of genes and environment on brain volumes in twin pairs concordant and discordant for bipolar disorder. *Arch Gen Psychiatry* 66: 142–151.

24. Bootsman F, Brouwer RM, Schnack HG, van Baal GC, van der Schot AC, Vonk R, *et al.* (2015): Genetic and environmental influences on cortical surface area and cortical thickness in bipolar disorder. *Psychol Med* 45: 193–204.
25. Collin G, Scholtens LH, Kahn RS, Hillegers MHJ, van den Heuvel MP (2017): Affected anatomical rich club and structural-functional coupling in young offspring of schizophrenia and bipolar disorder patients. *Biol Psychiatry* 82: 746–755.
26. Boos HB, Cahn W, van Haren NE, Derks EM, Brouwer RM, Schnack HG, *et al.* (2012): Focal and global brain measurements in siblings of patients with schizophrenia. *Schizophr Bull* 38: 814–825.
27. Boos HBM (2011): *Running in the family? Structural brain abnormalities in first-degree relatives of patients with schizophrenia*. ISBN: 978-90-393-5480-3: pp 103-116.
28. Baaré WF, van Oel CJ, Hulshoff Pol HE, Schnack HG, Durston S, Sitskoorn MM, Kahn RS (2001): Volumes of brain structures in twins discordant for schizophrenia. *Arch Gen Psychiatry* 58: 33–40.
29. Bohlken MM, Brouwer RM, Mandl RC, van den Heuvel MP, Hedman AM, de Hert M, *et al.* (2016): Structural brain connectivity as a genetic marker for schizophrenia. *JAMA Psychiatry* 73: 11–19.
